# Supplementary material for: Repurposed organoselenium tethered amidic acids as apoptosis inducers in melanoma cancer via P53, BAX, caspases-3, 6, 8, 9, BCL-2, MMP2, and MMP9 modulations
Source: Royal Society of Chemistry journal article supplement (doi:10.1039/d4ra02944e), 2024-01-01
Supplement: d4ra02944e1.pdf [file d4ra02944e1.pdf]

## Supporting Information

### Repurposed Organoselenium Tethered Amidic Acids as Apoptosis Inducers in Melanoma Cancer *via* P53, BAX, Caspases-3, 6, 8, 9, BCL-2, MMP2, and MMP9 Modulations

Saad Shaaban<sup>1,2,\*</sup>, Hanan A. Althikrallah<sup>1</sup>, Amr Negm<sup>1</sup>, Ayman Abo Elmaaty<sup>3</sup>, Ahmed A. Al-Karmalawy<sup>4,5\*</sup>

<sup>1</sup> Department of Chemistry, College of Science, King Faisal University, Al-Ahsa 31982, Saudi Arabia.

<sup>2</sup> Department of Chemistry, Faculty of Science, Mansoura University, 35516 Mansoura, Egypt.

<sup>3</sup> Medicinal Chemistry Department, Faculty of Pharmacy, Port Said University, Port Said, 42511, Egypt.

<sup>4</sup> Department of Pharmaceutical Chemistry, Faculty of Pharmacy, Horus University–Egypt, New Damietta 34518, Egypt.

<sup>5</sup> Pharmaceutical Chemistry Department, Faculty of Pharmacy, Ahram Canadian University, 6<sup>th</sup> of October City, Giza 12566, Egypt.

#### Corresponding authors:

Ahmed A. Al-Karmalawy: [akarmalawy@horus.edu.eg](mailto:akarmalawy@horus.edu.eg), ORCID: <https://orcid.org/0000-0002-8173-6073>

Saad Shaaban: [sibrahim@kfu.edu.sa](mailto:sibrahim@kfu.edu.sa), ORCID: <https://orcid.org/0000-0002-7835-6926>

## Supporting Information

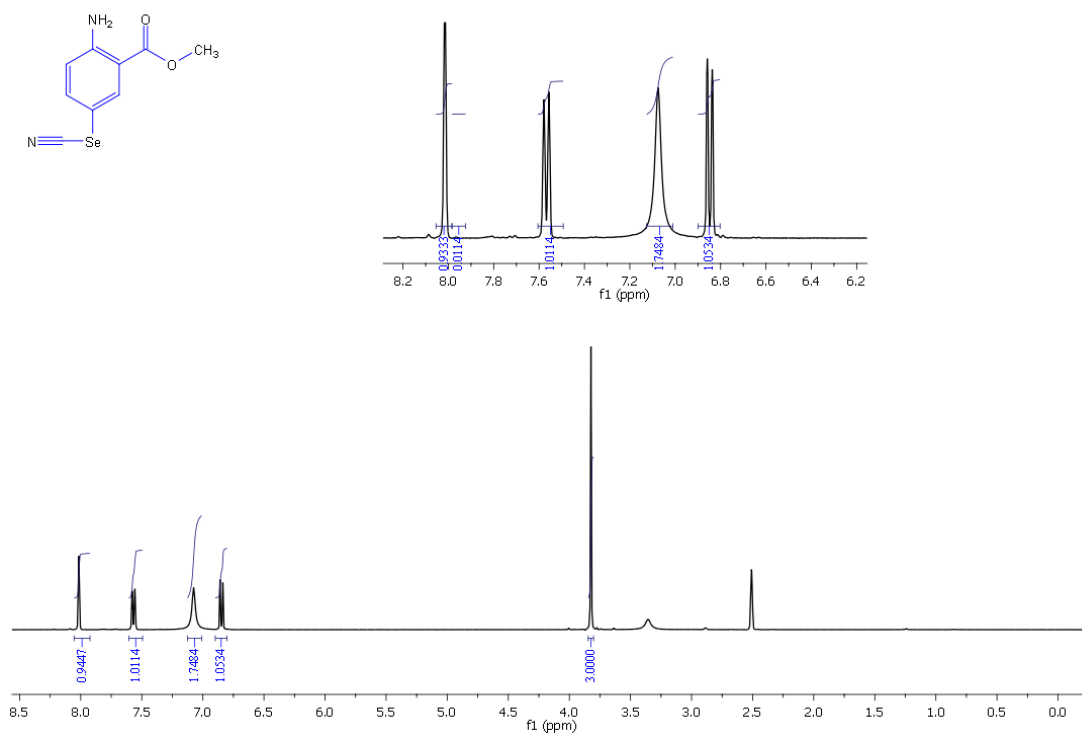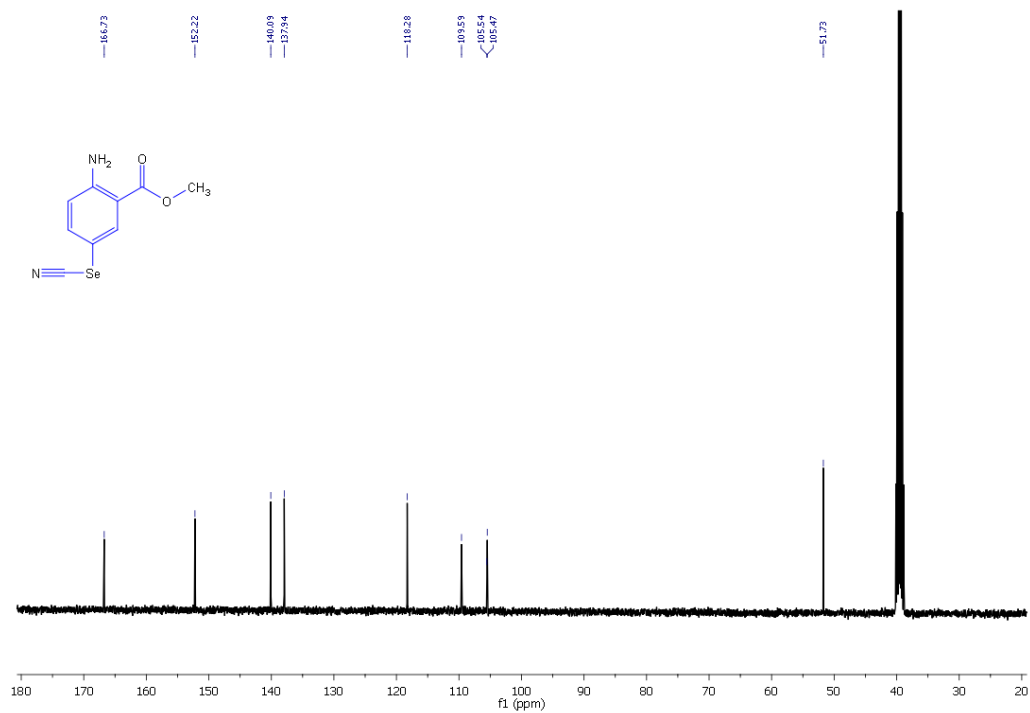

## Supporting Information

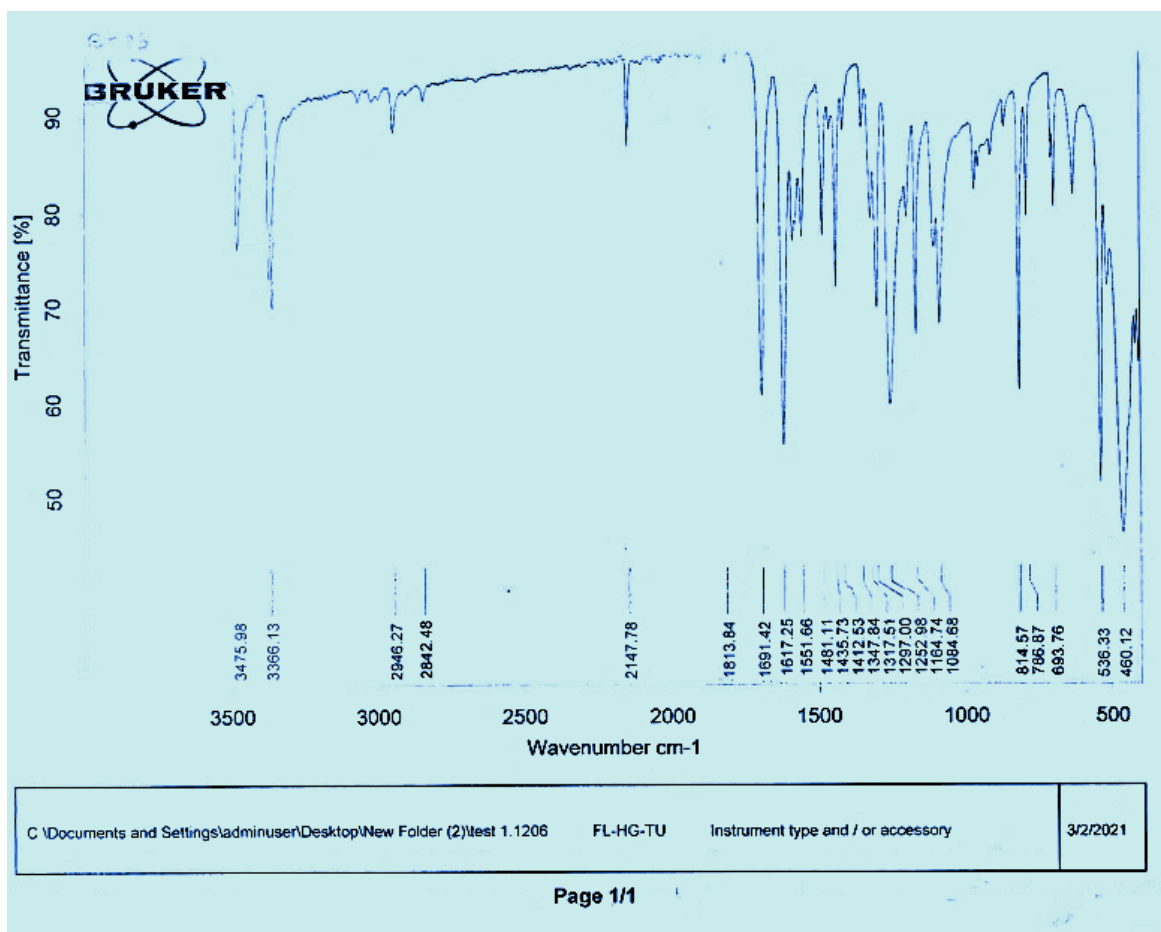

Figure S3. IR chart of compound 2.

# Supporting Information

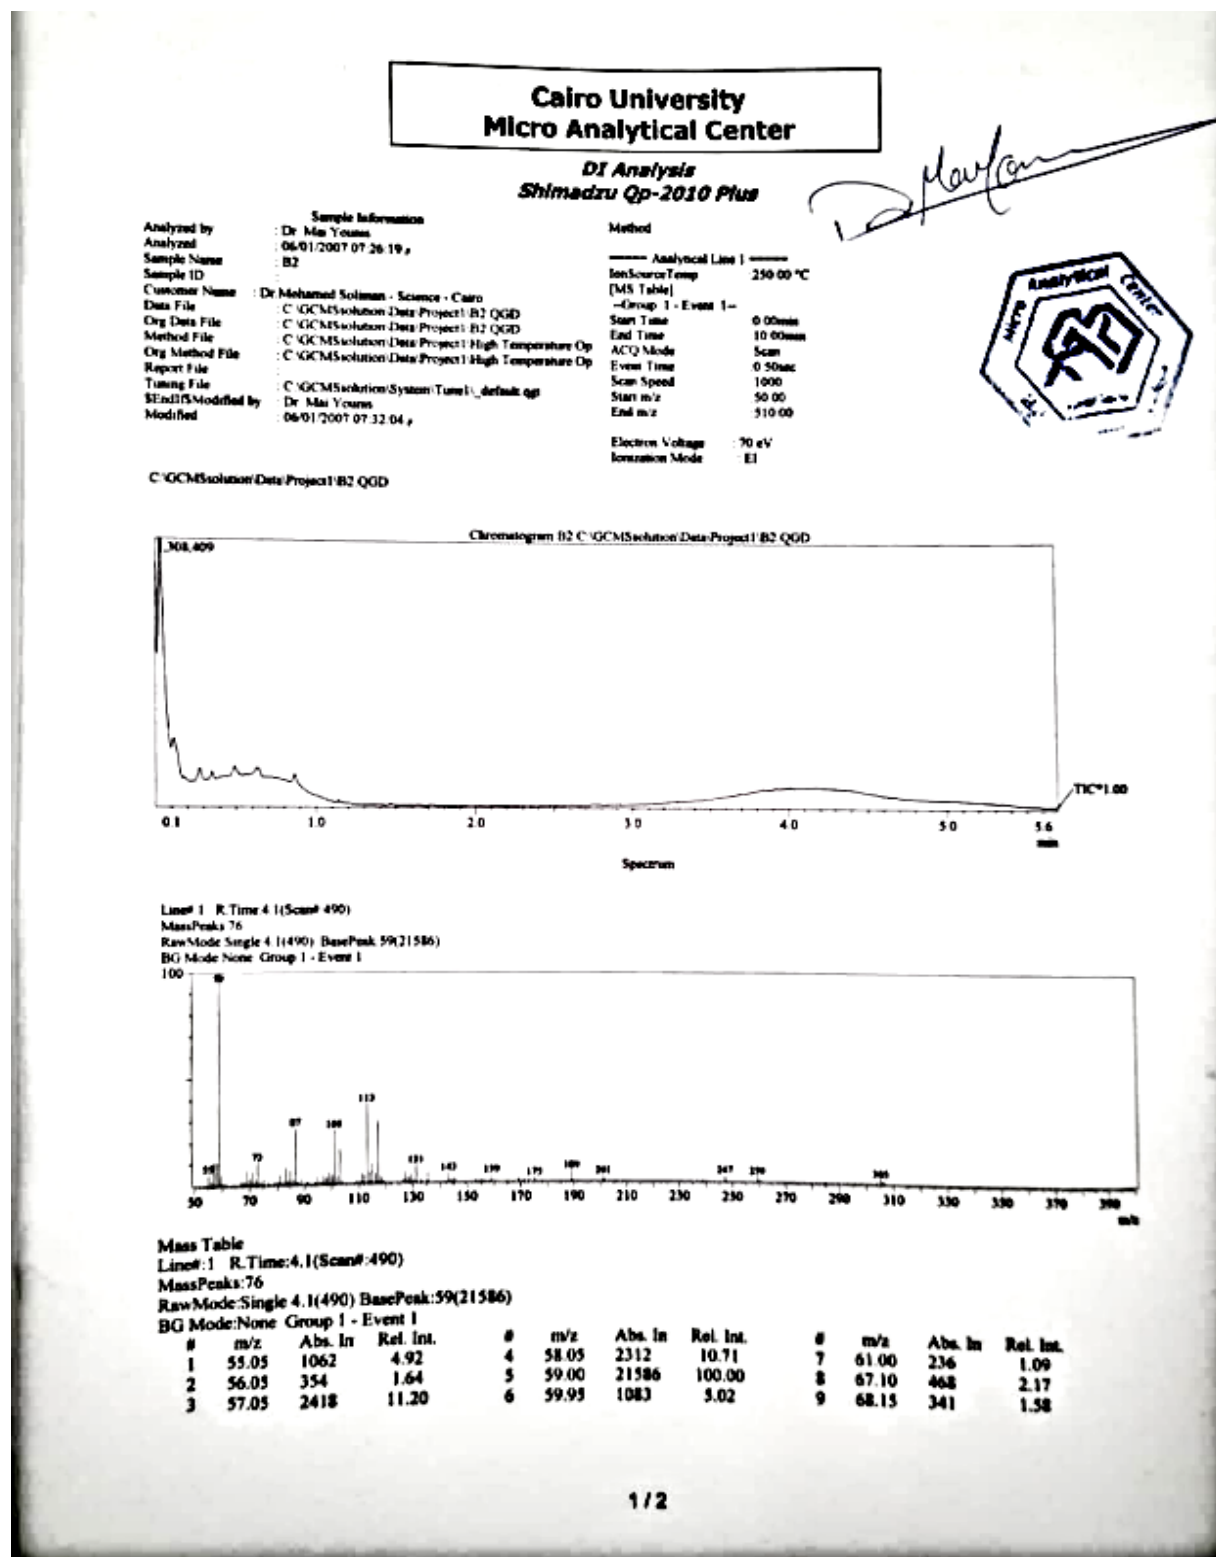

Figure S4. Mass chart of compound 2.

## Supporting Information

| $m/z$ | Abs. Int. | Rel. Int. | $m/z$ | Abs. Int. | Rel. Int. | $m/z$ | Abs. Int. | Rel. Int. |        |      |      |
|-------|-----------|-----------|-------|-----------|-----------|-------|-----------|-----------|--------|------|------|
| 10    | 69.05     | 1515      | 7.02  | 33        | 97.10     | 945   | 4.38      | 56        | 130.15 | 304  | 1.41 |
| 11    | 70.10     | 633       | 2.93  | 34        | 98.15     | 599   | 2.77      | 57        | 131.10 | 1722 | 7.98 |
| 12    | 71.05     | 1365      | 6.32  | 35        | 99.10     | 1268  | 5.87      | 58        | 133.15 | 432  | 2.00 |
| 13    | 72.05     | 440       | 2.04  | 36        | 100.15    | 840   | 3.89      | 59        | 135.20 | 1132 | 5.24 |
| 14    | 73.00     | 2258      | 10.46 | 37        | 101.10    | 5503  | 25.49     | 60        | 143.10 | 908  | 4.21 |
| 15    | 74.00     | 302       | 1.40  | 38        | 102.15    | 699   | 3.24      | 61        | 144.10 | 210  | 0.97 |
| 16    | 75.05     | 583       | 2.70  | 39        | 103.10    | 3649  | 16.90     | 62        | 145.20 | 492  | 2.28 |
| 17    | 77.00     | 268       | 1.24  | 40        | 104.10    | 322   | 1.49      | 63        | 153.20 | 234  | 1.08 |
| 18    | 79.00     | 223       | 1.03  | 41        | 109.10    | 401   | 1.86      | 64        | 155.20 | 281  | 1.30 |
| 19    | 80.10     | 324       | 1.50  | 42        | 110.10    | 220   | 1.02      | 65        | 159.15 | 662  | 3.07 |
| 20    | 81.10     | 954       | 4.42  | 43        | 111.10    | 969   | 4.49      | 66        | 169.20 | 334  | 1.55 |
| 21    | 82.15     | 315       | 1.46  | 44        | 112.15    | 807   | 3.74      | 67        | 171.20 | 204  | 0.95 |
| 22    | 83.10     | 1628      | 7.54  | 45        | 113.10    | 8084  | 37.45     | 68        | 173.20 | 202  | 0.94 |
| 23    | 84.10     | 481       | 2.23  | 46        | 114.10    | 1199  | 5.55      | 69        | 175.20 | 346  | 1.60 |
| 24    | 85.05     | 1397      | 6.47  | 47        | 115.10    | 2001  | 9.27      | 70        | 189.20 | 1038 | 4.81 |
| 25    | 86.05     | 492       | 2.28  | 48        | 116.25    | 936   | 4.34      | 71        | 201.15 | 502  | 2.33 |
| 26    | 87.05     | 5752      | 26.65 | 49        | 117.15    | 6264  | 29.02     | 72        | 247.20 | 575  | 2.68 |
| 27    | 88.00     | 314       | 1.45  | 50        | 118.15    | 607   | 2.81      | 73        | 259.35 | 515  | 2.39 |
| 28    | 89.05     | 560       | 2.59  | 51        | 119.20    | 271   | 1.26      | 74        | 260.40 | 207  | 0.96 |
| 29    | 91.10     | 327       | 1.51  | 52        | 126.15    | 310   | 1.44      | 75        | 305.40 | 401  | 1.86 |
| 30    | 94.10     | 202       | 0.94  | 53        | 127.10    | 1102  | 5.11      | 76        | 306.40 | 281  | 1.30 |
| 31    | 95.10     | 807       | 3.74  | 54        | 128.15    | 589   | 2.73      |           |        |      |      |
| 32    | 96.10     | 278       | 1.29  | 55        | 129.10    | 740   | 3.43      |           |        |      |      |

Figure S5. Mass chart of compound 2.

## Supporting Information

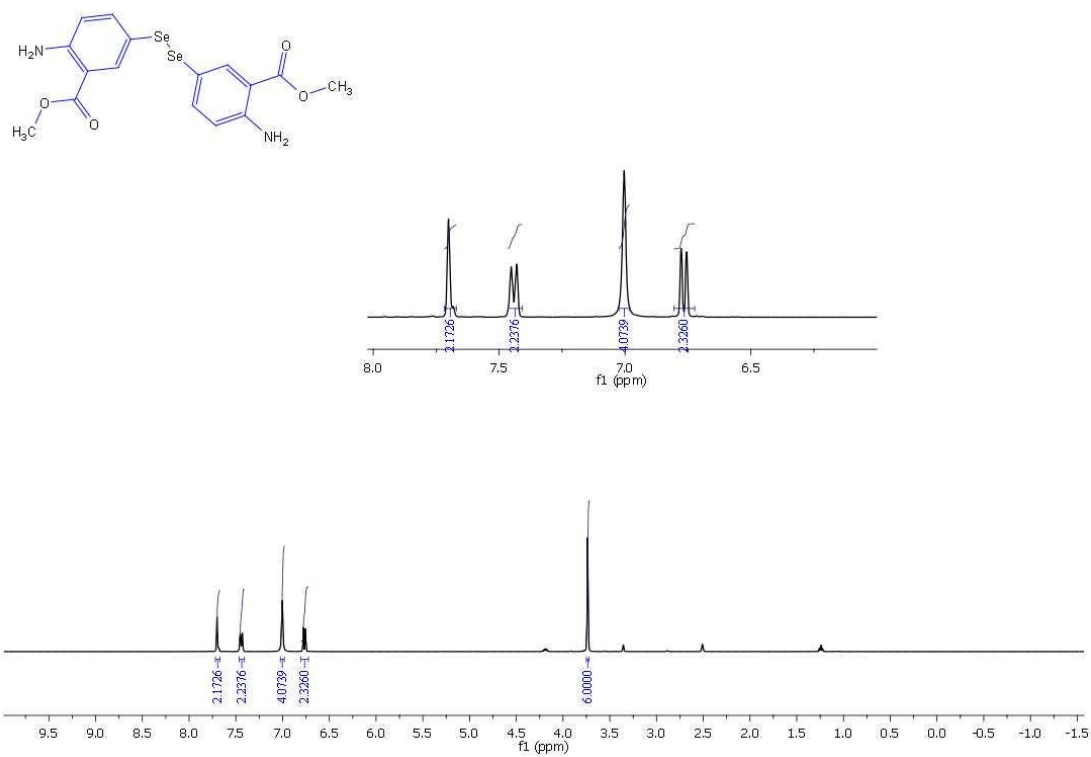

**Figure S6.** <sup>1</sup>H NMR chart of compound 3.

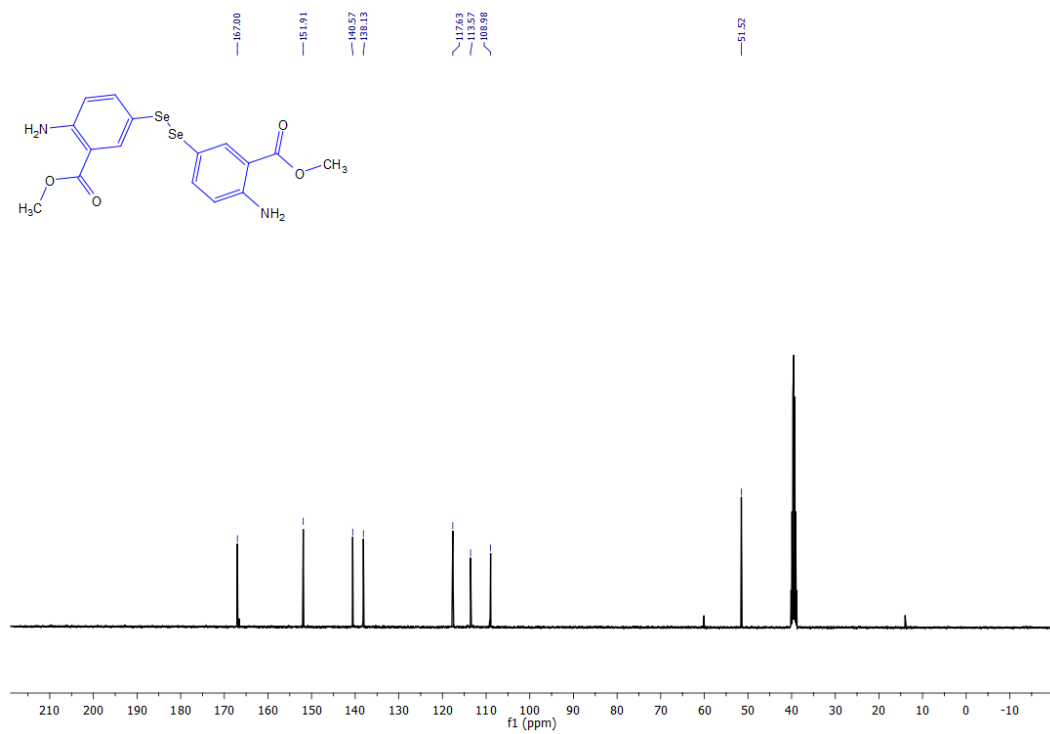

**Figure S7.** <sup>13</sup>C NMR chart of compound 3.

## Supporting Information

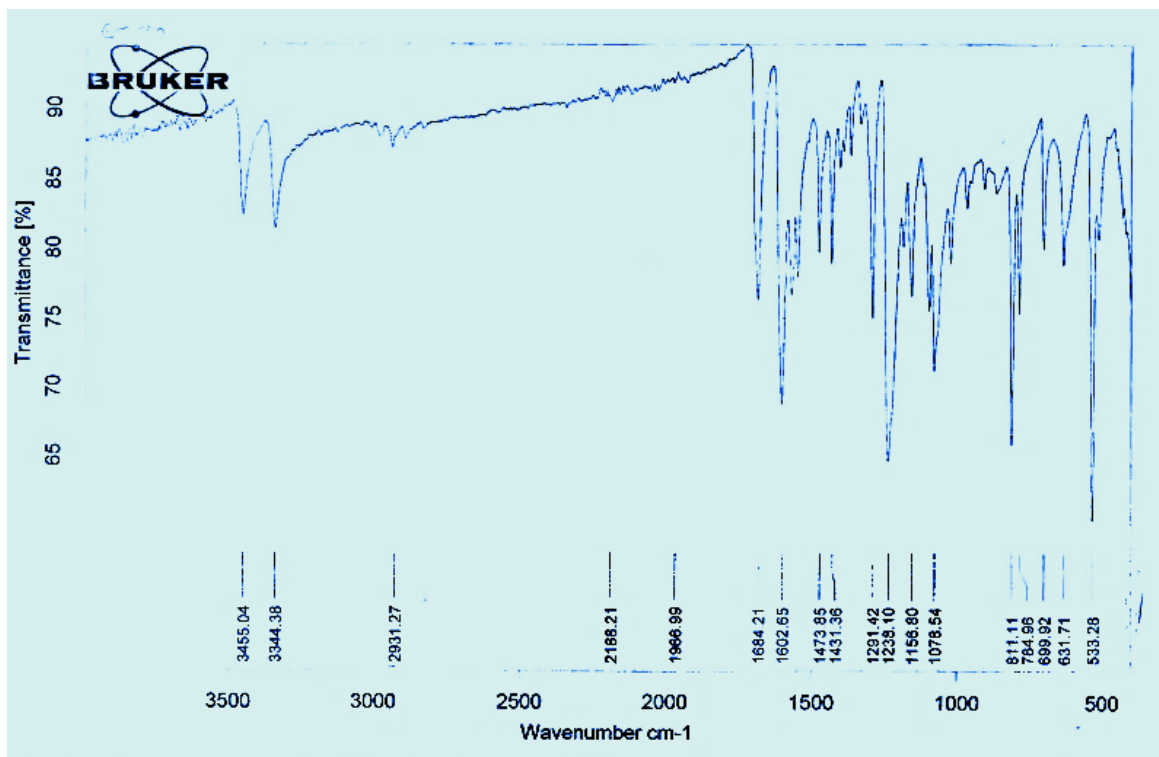

**Figure S8.** IR chart of compound **3**.

# Supporting Information

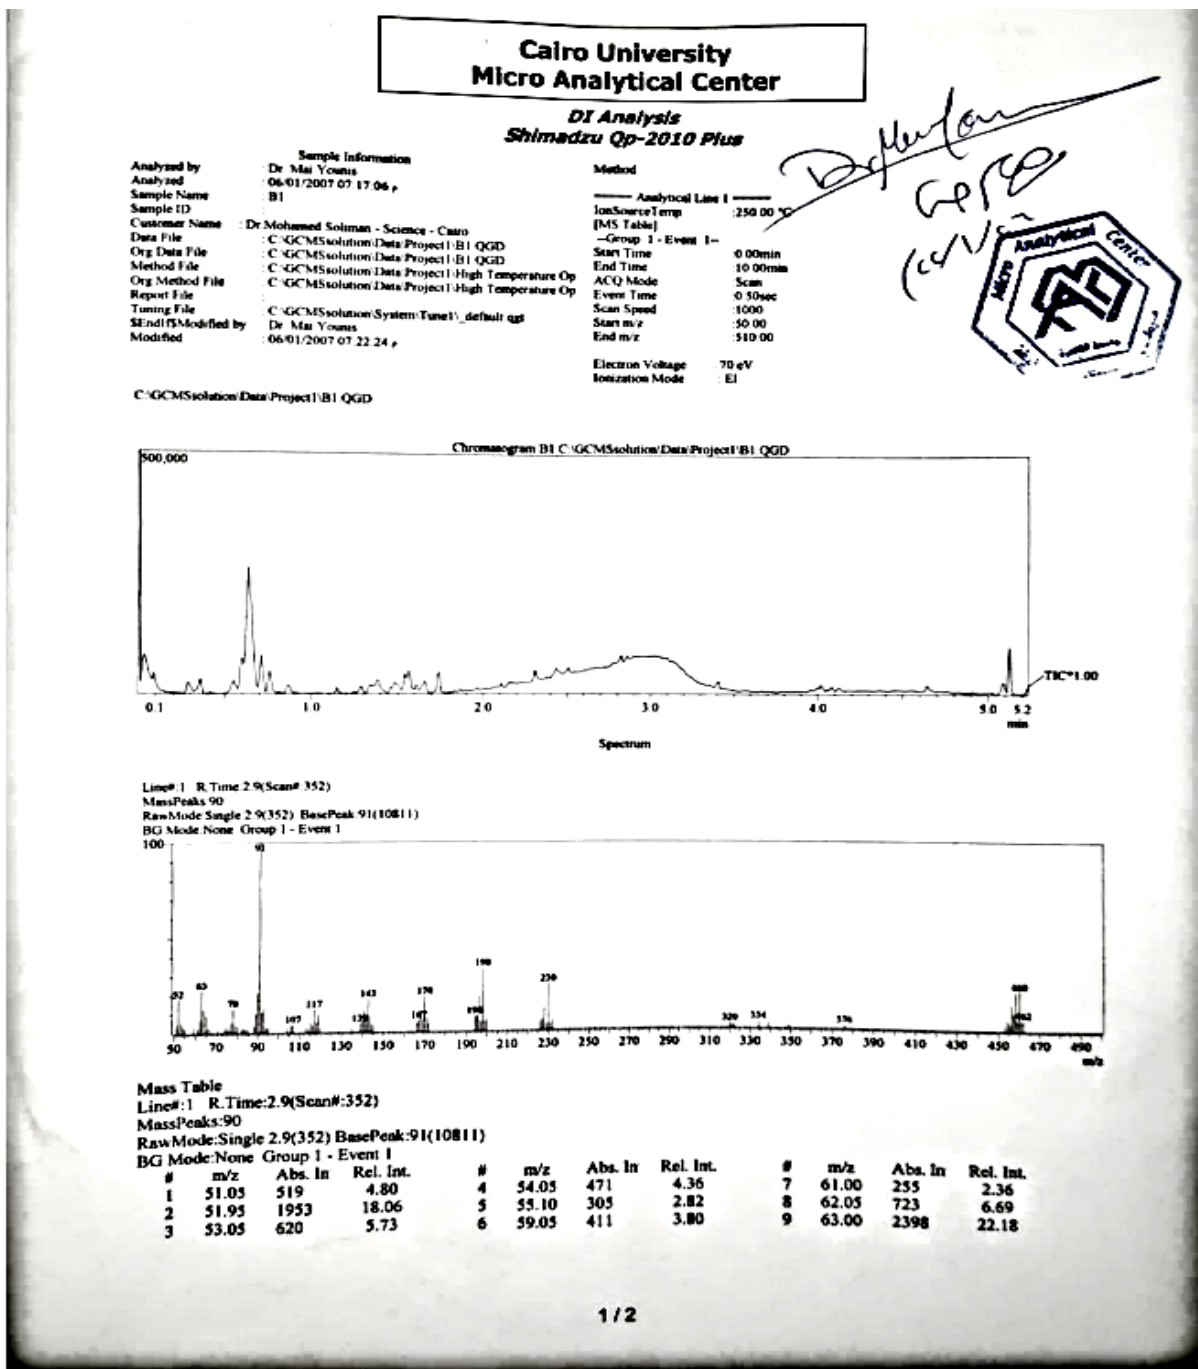

Figure S9. Mass chart of compound 3.



## Supporting Information

| #  | m/z    | Abs. In | Rel. Int. | #  | m/z    | Abs. In | Rel. Int. | #  | m/z    | Abs. In | Rel. Int. |
|----|--------|---------|-----------|----|--------|---------|-----------|----|--------|---------|-----------|
| 10 | 64.05  | 1311    | 12.13     | 37 | 113.00 | 308     | 2.85      | 64 | 198.00 | 3602    | 33.32     |
| 11 | 65.05  | 960     | 8.88      | 38 | 113.90 | 222     | 2.05      | 65 | 199.00 | 591     | 5.47      |
| 12 | 66.00  | 278     | 2.57      | 39 | 114.90 | 636     | 5.88      | 66 | 200.05 | 690     | 6.38      |
| 13 | 67.00  | 247     | 2.28      | 40 | 116.05 | 385     | 3.56      | 67 | 226.05 | 505     | 4.67      |
| 14 | 71.00  | 202     | 1.87      | 41 | 117.00 | 1319    | 12.20     | 68 | 227.05 | 655     | 6.06      |
| 15 | 74.00  | 313     | 2.90      | 42 | 118.05 | 599     | 5.54      | 69 | 228.00 | 1222    | 11.30     |
| 16 | 75.00  | 255     | 2.36      | 43 | 119.10 | 1022    | 9.45      | 70 | 229.15 | 316     | 2.92      |
| 17 | 76.00  | 214     | 1.98      | 44 | 120.10 | 310     | 2.87      | 71 | 230.05 | 2640    | 24.42     |
| 18 | 77.05  | 571     | 5.28      | 45 | 135.10 | 289     | 2.67      | 72 | 231.05 | 347     | 3.21      |
| 19 | 78.05  | 1366    | 12.64     | 46 | 139.00 | 482     | 4.46      | 73 | 232.05 | 594     | 5.49      |
| 20 | 79.10  | 466     | 4.31      | 47 | 140.00 | 614     | 5.68      | 74 | 320.00 | 290     | 2.68      |
| 21 | 80.10  | 388     | 3.59      | 48 | 141.05 | 1196    | 11.06     | 75 | 321.00 | 222     | 2.05      |
| 22 | 82.10  | 233     | 2.16      | 49 | 142.05 | 619     | 5.73      | 76 | 322.00 | 228     | 2.11      |
| 23 | 83.10  | 260     | 2.40      | 50 | 143.00 | 1894    | 17.52     | 77 | 334.00 | 398     | 3.68      |
| 24 | 84.10  | 220     | 2.03      | 51 | 144.00 | 850     | 7.86      | 78 | 339.00 | 318     | 2.94      |
| 25 | 85.10  | 278     | 2.57      | 52 | 144.95 | 409     | 3.78      | 79 | 349.00 | 230     | 2.13      |
| 26 | 88.05  | 377     | 3.49      | 53 | 166.05 | 493     | 4.56      | 80 | 376.00 | 215     | 1.99      |
| 27 | 89.05  | 1081    | 10.00     | 54 | 167.05 | 639     | 5.91      | 81 | 453.00 | 263     | 2.43      |
| 28 | 90.05  | 2287    | 21.15     | 55 | 168.05 | 1148    | 10.62     | 82 | 454.20 | 604     | 5.59      |
| 29 | 91.05  | 10811   | 100.00    | 56 | 169.15 | 688     | 6.36      | 83 | 455.20 | 425     | 3.93      |
| 30 | 92.05  | 1150    | 10.64     | 57 | 170.05 | 2031    | 18.79     | 84 | 456.25 | 1479    | 13.68     |
| 31 | 92.95  | 1429    | 13.22     | 58 | 171.10 | 802     | 7.42      | 85 | 457.20 | 1015    | 9.39      |
| 32 | 94.00  | 254     | 2.35      | 59 | 172.10 | 420     | 3.88      | 86 | 458.20 | 2169    | 20.06     |
| 33 | 95.00  | 354     | 3.27      | 60 | 194.05 | 863     | 7.98      | 87 | 459.15 | 562     | 5.20      |
| 34 | 104.00 | 249     | 2.30      | 61 | 195.05 | 858     | 7.94      | 88 | 460.15 | 2244    | 20.76     |
| 35 | 106.10 | 398     | 3.68      | 62 | 196.00 | 1993    | 18.43     | 89 | 461.15 | 521     | 4.82      |
| 36 | 107.00 | 444     | 4.11      | 63 | 197.05 | 575     | 5.32      | 90 | 462.10 | 618     | 5.72      |

Figure S10. Mass chart of compound 3.

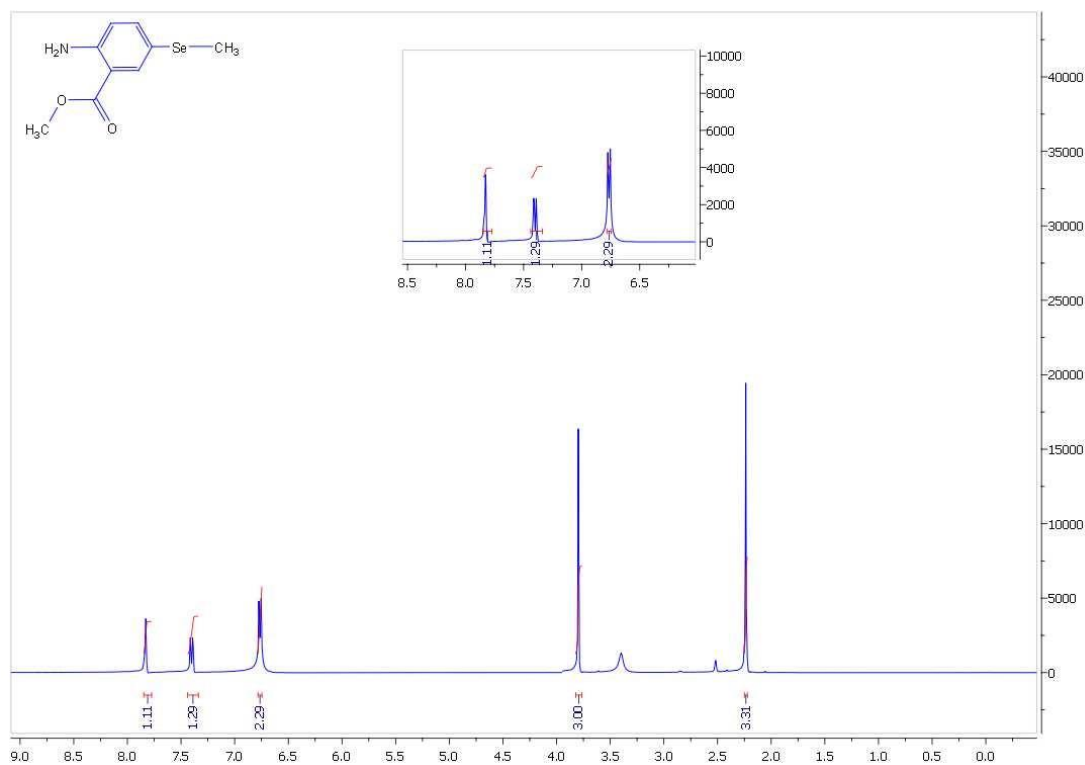

Figure S11. <sup>1</sup>H NMR chart of compound 4.

## Supporting Information

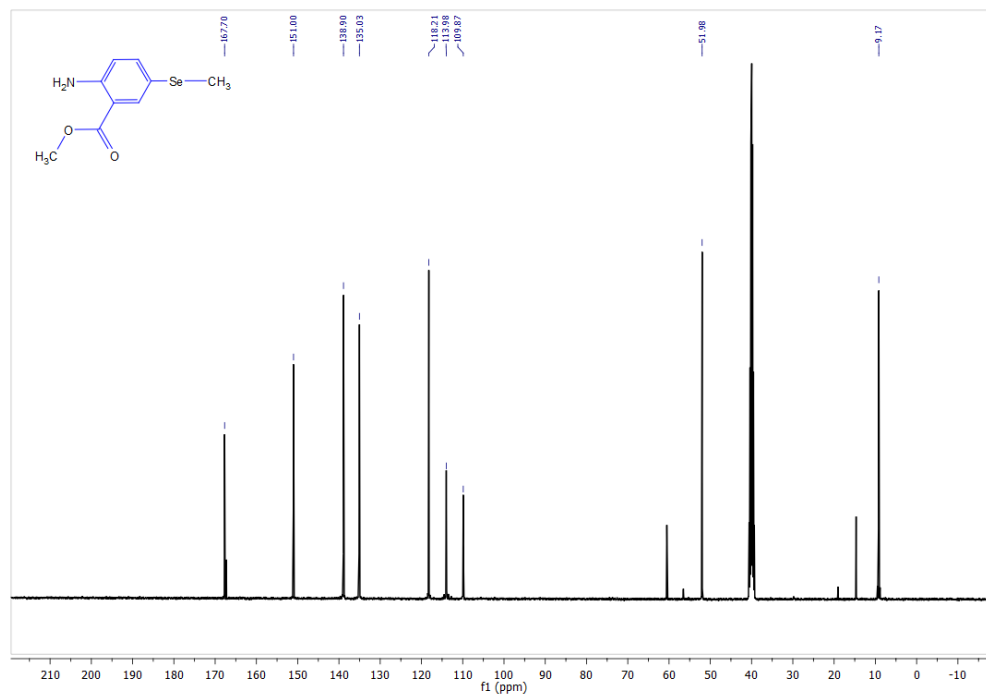

Figure S12. <sup>13</sup>C NMR chart of compound 4.

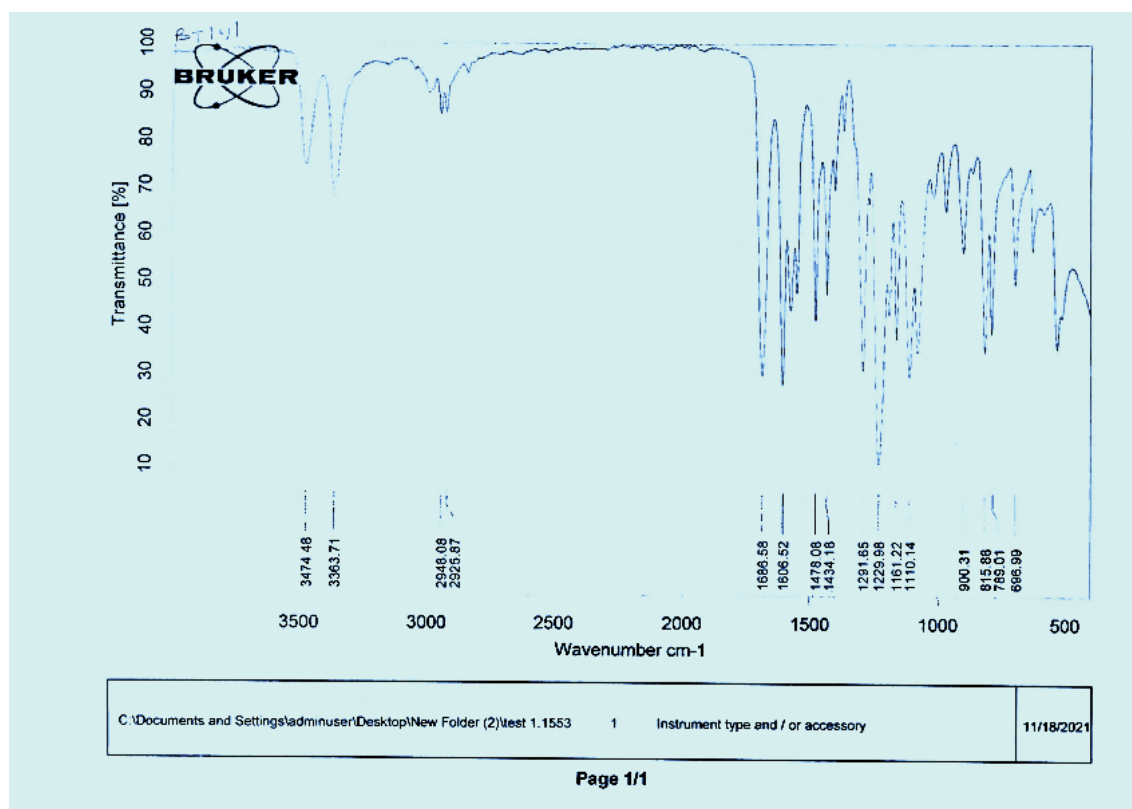

Figure S13. IR chart of compound 4.

# Supporting Information

## Cairo University Micro Analytical Center

### DI Analysis Shimadzu Qp-2010 Plus

Sample Information  
 Analyzed by : Dr. Mai Younis  
 Analyzed : 16/01/2007 03:02:11  
 Sample Name : B35  
 Sample ID :  
 Customer Name : Dr. Mohamed Soliman - Science - Cairo  
 Data File : C:\GCMSolution\Data\Project1\B35 QGD  
 Org Data File : C:\GCMSolution\Data\Project1\B35 QGD  
 Method File : C:\GCMSolution\Data\Project1\High Temperature Op  
 Org Method File : C:\GCMSolution\Data\Project1\High Temperature Op  
 Report File :  
 Tuning File : C:\GCMSolution\System\Tune1\\_default.gcf  
 SEAD/PS Modified by : Dr. Mai Younis  
 Modified : 16/01/2007 03:12:11

Method  
 Analytical Line 1  
 IonSourceTemp : 250.00 °C  
 [MS Table]  
 --Group 1 - Event 1--  
 Start Time : 0.00min  
 End Time : 10.00min  
 ACQ Mode : Scan  
 Event Time : 0.50sec  
 Scan Speed : 1000  
 Start m/z : 50.00  
 End m/z : 310.00  
 Electron Voltage : 70 eV  
 Ionization Mode : EI

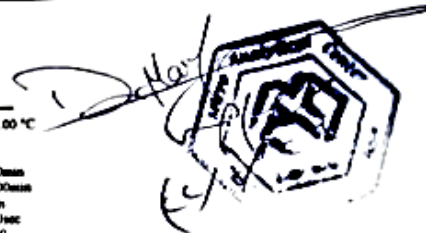

C:\GCMSolution\Data\Project1\B35 QGD

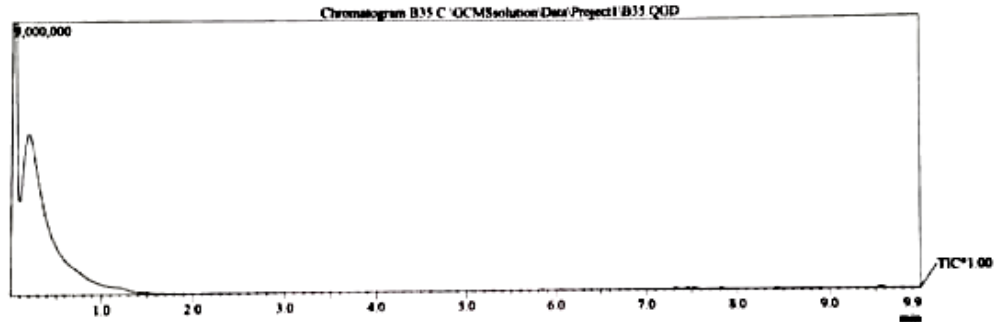

Spectrum

Line# 1 R. Time:0.2(Scan#:26)  
 MassPeaks:205  
 RawMode:Single 0.2(26) BasePeak:245(391154)  
 BG Mode:None Group 1 - Event 1

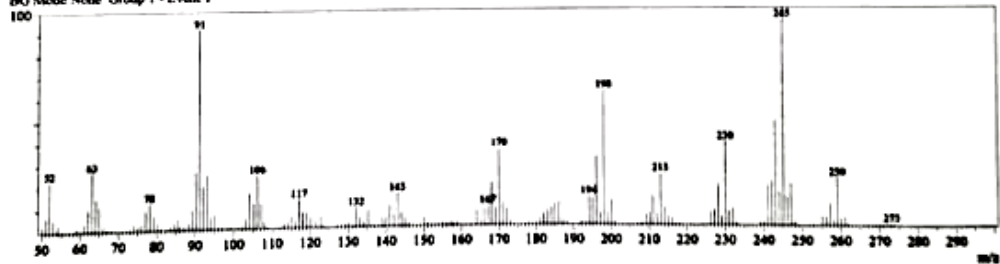

Mass Table  
 Line# 1 R. Time:0.2(Scan#:26)  
 MassPeaks:205  
 RawMode:Single 0.2(26) BasePeak:245(391154)  
 BG Mode:None Group 1 - Event 1

| # | m/z   | Abs. In | Rel. Int. | # | m/z   | Abs. In | Rel. Int. |
|---|-------|---------|-----------|---|-------|---------|-----------|
| 1 | 50.05 | 10411   | 2.66      | 4 | 53.00 | 21482   | 5.49      |
| 2 | 51.05 | 26260   | 6.71      | 5 | 54.05 | 11184   | 2.86      |
| 3 | 52.00 | 89298   | 22.83     | 6 | 55.00 | 2246    | 0.57      |
|   |       |         |           | 7 | 56.05 | 488     | 0.12      |
|   |       |         |           | 8 | 57.05 | 709     | 0.18      |
|   |       |         |           | 9 | 58.05 | 1164    | 0.30      |

## Supporting Information

Figure S14. Mass chart of compound 4.

| #  | m/z    | Abs. In | Rel. Int. | #   | m/z    | Abs. In | Rel. Int. | #   | m/z    | Abs. In | Rel. Int. |
|----|--------|---------|-----------|-----|--------|---------|-----------|-----|--------|---------|-----------|
| 10 | 59.00  | 6150    | 1.57      | 76  | 126.05 | 2179    | 0.56      | 142 | 195.00 | 47017   | 12.02     |
| 11 | 60.05  | 1575    | 0.40      | 77  | 127.05 | 3204    | 0.82      | 143 | 196.00 | 122146  | 31.23     |
| 12 | 61.05  | 14415   | 3.69      | 78  | 128.00 | 4023    | 1.03      | 144 | 197.05 | 22307   | 5.70      |
| 13 | 62.05  | 39733   | 10.16     | 79  | 129.05 | 5617    | 1.44      | 145 | 198.00 | 241660  | 61.78     |
| 14 | 63.05  | 103836  | 26.55     | 80  | 130.00 | 7762    | 1.98      | 146 | 198.95 | 25629   | 6.53      |
| 15 | 64.05  | 57318   | 14.65     | 81  | 131.15 | 4478    | 1.14      | 147 | 200.00 | 43719   | 11.18     |
| 16 | 65.05  | 43819   | 11.20     | 82  | 132.10 | 33902   | 8.67      | 148 | 200.95 | 4204    | 1.07      |
| 17 | 66.10  | 9838    | 2.52      | 83  | 133.10 | 15628   | 4.00      | 149 | 201.95 | 533     | 0.14      |
| 18 | 67.05  | 4572    | 1.17      | 84  | 134.15 | 8746    | 2.24      | 150 | 207.00 | 2228    | 0.57      |
| 19 | 68.05  | 2933    | 0.75      | 85  | 135.10 | 31116   | 7.95      | 151 | 208.05 | 2526    | 0.65      |
| 20 | 69.10  | 1041    | 0.27      | 86  | 136.15 | 5476    | 1.40      | 152 | 209.05 | 20084   | 5.13      |
| 21 | 70.05  | 837     | 0.21      | 87  | 137.00 | 2783    | 0.71      | 153 | 210.05 | 23473   | 6.00      |
| 22 | 71.05  | 1646    | 0.42      | 88  | 138.05 | 3352    | 0.86      | 154 | 211.00 | 50268   | 12.85     |
| 23 | 72.05  | 1669    | 0.43      | 89  | 139.00 | 15473   | 3.96      | 155 | 212.05 | 22070   | 5.64      |
| 24 | 72.95  | 2952    | 0.75      | 90  | 140.00 | 17660   | 4.51      | 156 | 213.00 | 91327   | 23.35     |
| 25 | 74.05  | 12141   | 3.10      | 91  | 141.00 | 39022   | 9.98      | 157 | 214.00 | 31220   | 7.98      |
| 26 | 75.10  | 10198   | 2.61      | 92  | 142.05 | 21311   | 5.45      | 158 | 215.00 | 18164   | 4.64      |
| 27 | 76.10  | 12385   | 3.17      | 93  | 143.00 | 58711   | 15.01     | 159 | 216.00 | 12508   | 3.20      |
| 28 | 77.10  | 36498   | 9.33      | 94  | 144.00 | 25175   | 6.44      | 160 | 216.95 | 1191    | 0.30      |
| 29 | 78.05  | 47310   | 12.09     | 95  | 145.00 | 13801   | 3.53      | 161 | 218.00 | 1618    | 0.41      |
| 30 | 79.10  | 24441   | 6.25      | 96  | 146.00 | 5042    | 1.29      | 162 | 224.00 | 2599    | 0.66      |
| 31 | 80.00  | 15313   | 3.91      | 97  | 147.00 | 1039    | 0.27      | 163 | 225.05 | 1510    | 0.39      |
| 32 | 81.00  | 4794    | 1.23      | 98  | 148.10 | 804     | 0.21      | 164 | 226.05 | 26426   | 6.76      |
| 33 | 82.55  | 1873    | 0.48      | 99  | 149.15 | 1515    | 0.39      | 165 | 227.05 | 28172   | 7.20      |
| 34 | 83.55  | 6981    | 1.78      | 100 | 150.10 | 15154   | 3.36      | 166 | 228.05 | 72774   | 18.60     |
| 35 | 84.55  | 13095   | 3.35      | 101 | 151.10 | 4439    | 1.13      | 167 | 229.05 | 16399   | 4.19      |
| 36 | 85.50  | 19868   | 5.08      | 102 | 151.95 | 1797    | 0.46      | 168 | 230.05 | 148867  | 38.06     |
| 37 | 86.10  | 5970    | 1.53      | 103 | 153.00 | 3161    | 0.81      | 169 | 231.00 | 25292   | 6.47      |
| 38 | 87.05  | 4792    | 1.23      | 104 | 154.00 | 3514    | 0.90      | 170 | 232.05 | 29923   | 7.65      |
| 39 | 88.10  | 12948   | 3.31      | 105 | 155.00 | 5122    | 1.31      | 171 | 233.00 | 4730    | 1.21      |
| 40 | 89.10  | 37161   | 9.50      | 106 | 156.00 | 4514    | 1.15      | 172 | 233.95 | 605     | 0.15      |
| 41 | 90.15  | 101589  | 25.97     | 107 | 157.05 | 6492    | 1.66      | 173 | 238.15 | 734     | 0.19      |
| 42 | 91.10  | 358905  | 91.76     | 108 | 158.00 | 3975    | 1.02      | 174 | 239.10 | 6298    | 1.61      |
| 43 | 92.05  | 75198   | 19.22     | 109 | 159.00 | 5625    | 1.44      | 175 | 240.15 | 7887    | 2.02      |
| 44 | 93.00  | 97377   | 24.89     | 110 | 160.00 | 1470    | 0.38      | 176 | 241.10 | 72847   | 18.62     |
| 45 | 94.00  | 22561   | 5.77      | 111 | 161.00 | 1084    | 0.28      | 177 | 242.10 | 80234   | 20.51     |
| 46 | 95.00  | 26670   | 6.82      | 112 | 162.00 | 380     | 0.10      | 178 | 243.10 | 187193  | 47.86     |
| 47 | 96.00  | 4114    | 1.05      | 113 | 163.15 | 1307    | 0.33      | 179 | 244.15 | 60066   | 15.36     |
| 48 | 97.05  | 4225    | 1.08      | 114 | 164.10 | 28951   | 7.40      | 180 | 245.10 | 391154  | 100.00    |
| 49 | 98.35  | 2449    | 0.63      | 115 | 165.05 | 9689    | 2.48      | 181 | 246.05 | 51306   | 13.12     |
| 50 | 99.30  | 3386    | 0.87      | 116 | 166.00 | 30183   | 7.72      | 182 | 247.05 | 74480   | 19.04     |
| 51 | 100.25 | 1374    | 0.35      | 117 | 167.05 | 33926   | 8.67      | 183 | 248.05 | 8926    | 2.28      |
| 52 | 101.05 | 1757    | 0.45      | 118 | 168.00 | 75583   | 19.32     | 184 | 249.05 | 953     | 0.24      |
| 53 | 102.10 | 5450    | 1.39      | 119 | 169.05 | 30276   | 7.74      | 185 | 253.10 | 1460    | 0.37      |
| 54 | 103.15 | 15671   | 4.01      | 120 | 170.00 | 137220  | 35.08     | 186 | 254.15 | 1011    | 0.26      |
| 55 | 104.15 | 62814   | 16.06     | 121 | 171.00 | 40180   | 10.27     | 187 | 255.10 | 15329   | 3.92      |
| 56 | 105.25 | 45718   | 11.69     | 122 | 172.00 | 30348   | 7.76      | 188 | 256.15 | 16105   | 4.12      |
| 57 | 106.20 | 94842   | 24.25     | 123 | 173.00 | 7290    | 1.86      | 189 | 257.10 | 40538   | 10.36     |
| 58 | 107.15 | 45188   | 11.55     | 124 | 174.00 | 1239    | 0.32      | 190 | 258.15 | 9549    | 2.44      |
| 59 | 108.15 | 10687   | 2.73      | 125 | 177.20 | 238     | 0.06      | 191 | 259.10 | 84319   | 21.56     |
| 60 | 109.05 | 2089    | 0.53      | 126 | 178.15 | 3162    | 0.81      | 192 | 260.05 | 12047   | 3.08      |
| 61 | 110.05 | 710     | 0.18      | 127 | 179.05 | 1817    | 0.46      | 193 | 261.10 | 15478   | 3.96      |
| 62 | 111.05 | 1314    | 0.34      | 128 | 180.00 | 3514    | 0.90      | 194 | 262.05 | 2350    | 0.60      |
| 63 | 112.05 | 1199    | 0.31      | 129 | 181.05 | 9794    | 2.50      | 195 | 263.05 | 335     | 0.09      |
| 64 | 113.00 | 7610    | 1.95      | 130 | 182.00 | 19970   | 5.11      | 196 | 264.10 | 220     | 0.06      |
| 65 | 114.00 | 10354   | 2.65      | 131 | 183.00 | 25158   | 6.43      | 197 | 269.15 | 730     | 0.19      |
| 66 | 115.00 | 21430   | 5.48      | 132 | 184.00 | 31201   | 7.98      | 198 | 270.15 | 629     | 0.16      |
| 67 | 116.05 | 12818   | 3.28      | 133 | 185.00 | 38050   | 9.73      | 199 | 271.15 | 1493    | 0.38      |
| 68 | 117.05 | 50031   | 12.79     | 134 | 186.00 | 40924   | 10.46     | 200 | 272.25 | 533     | 0.14      |
| 69 | 118.05 | 27671   | 7.07      | 135 | 187.00 | 10028   | 2.56      | 201 | 273.15 | 2823    | 0.72      |
| 70 | 119.10 | 26692   | 6.82      | 136 | 188.00 | 6714    | 1.72      | 202 | 274.20 | 558     | 0.14      |
| 71 | 120.10 | 18391   | 4.70      | 137 | 189.00 | 868     | 0.22      | 203 | 275.20 | 654     | 0.17      |
| 72 | 121.55 | 12099   | 3.09      | 138 | 191.05 | 296     | 0.08      | 204 | 276.20 | 290     | 0.07      |
| 73 | 122.60 | 19750   | 5.05      | 139 | 192.00 | 4826    | 1.23      | 205 | 277.10 | 369     | 0.09      |
| 74 | 123.55 | 4338    | 1.11      | 140 | 193.05 | 2875    | 0.74      |     |        |         |           |
| 75 | 125.05 | 1061    | 0.27      | 141 | 194.00 | 49812   | 12.73     |     |        |         |           |

Figure S15. Mass chart of compound 4.

## Supporting Information

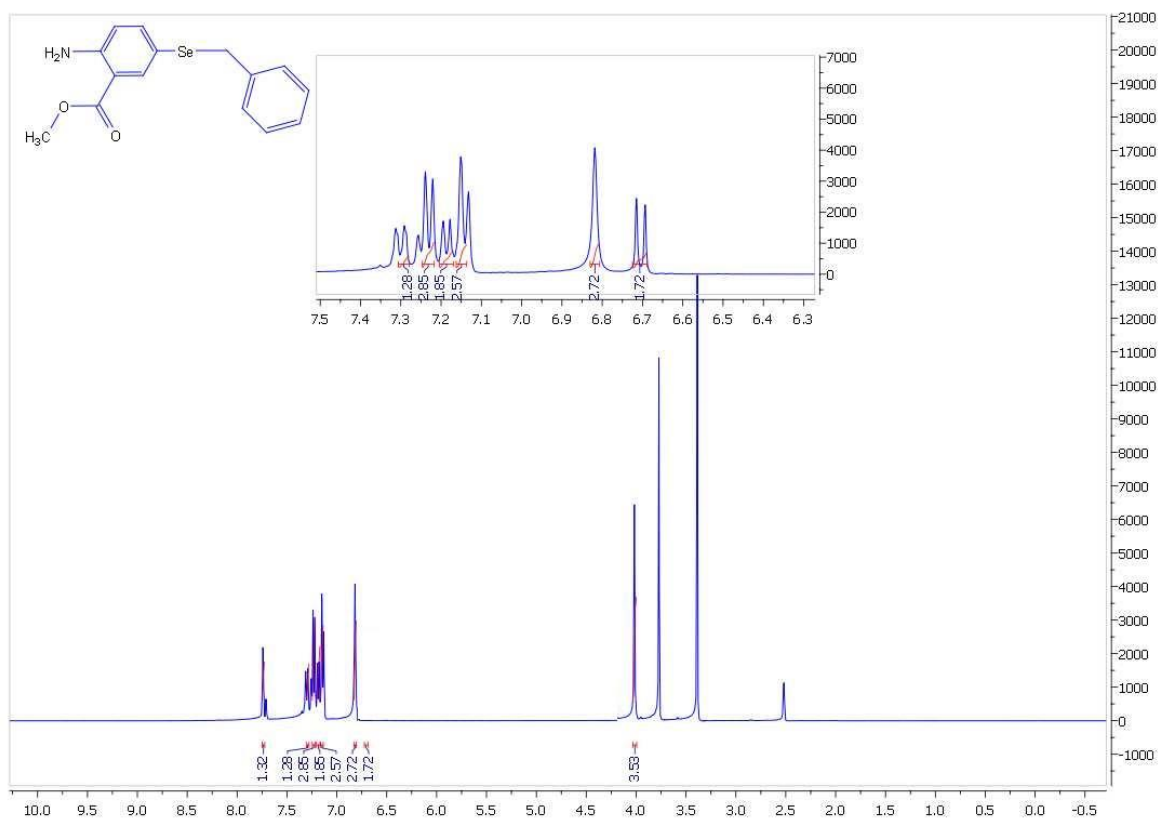

Figure S16.  $^1\text{H}$  NMR chart of compound 5.

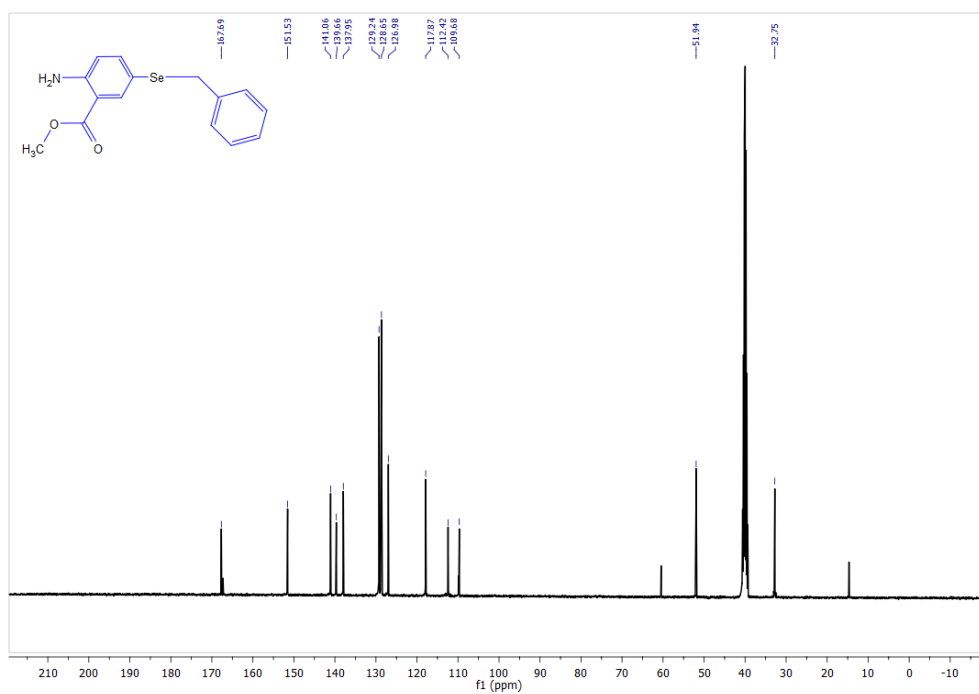

Figure S17.  $^{13}\text{C}$  NMR chart of compound 5.

## Supporting Information

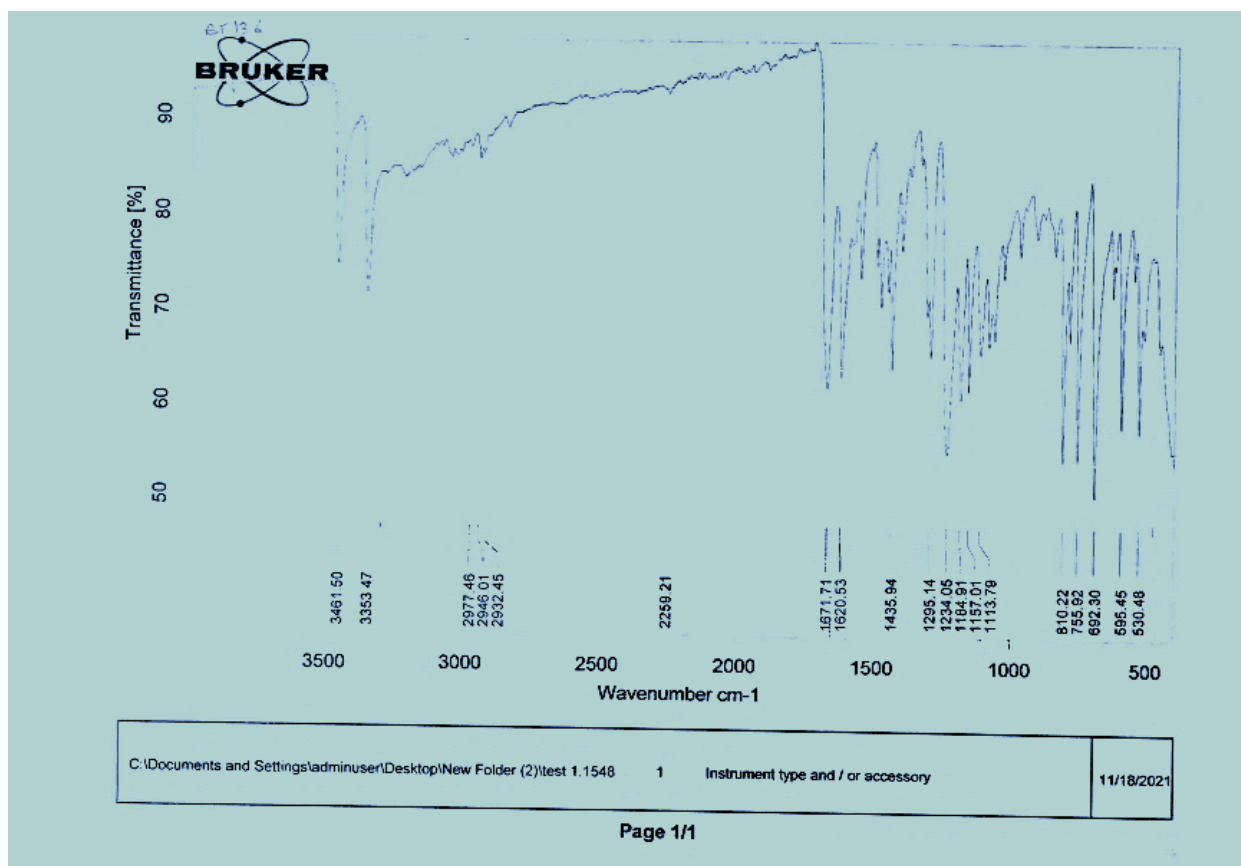

Figure S18. IR chart of compound 5.

# Supporting Information

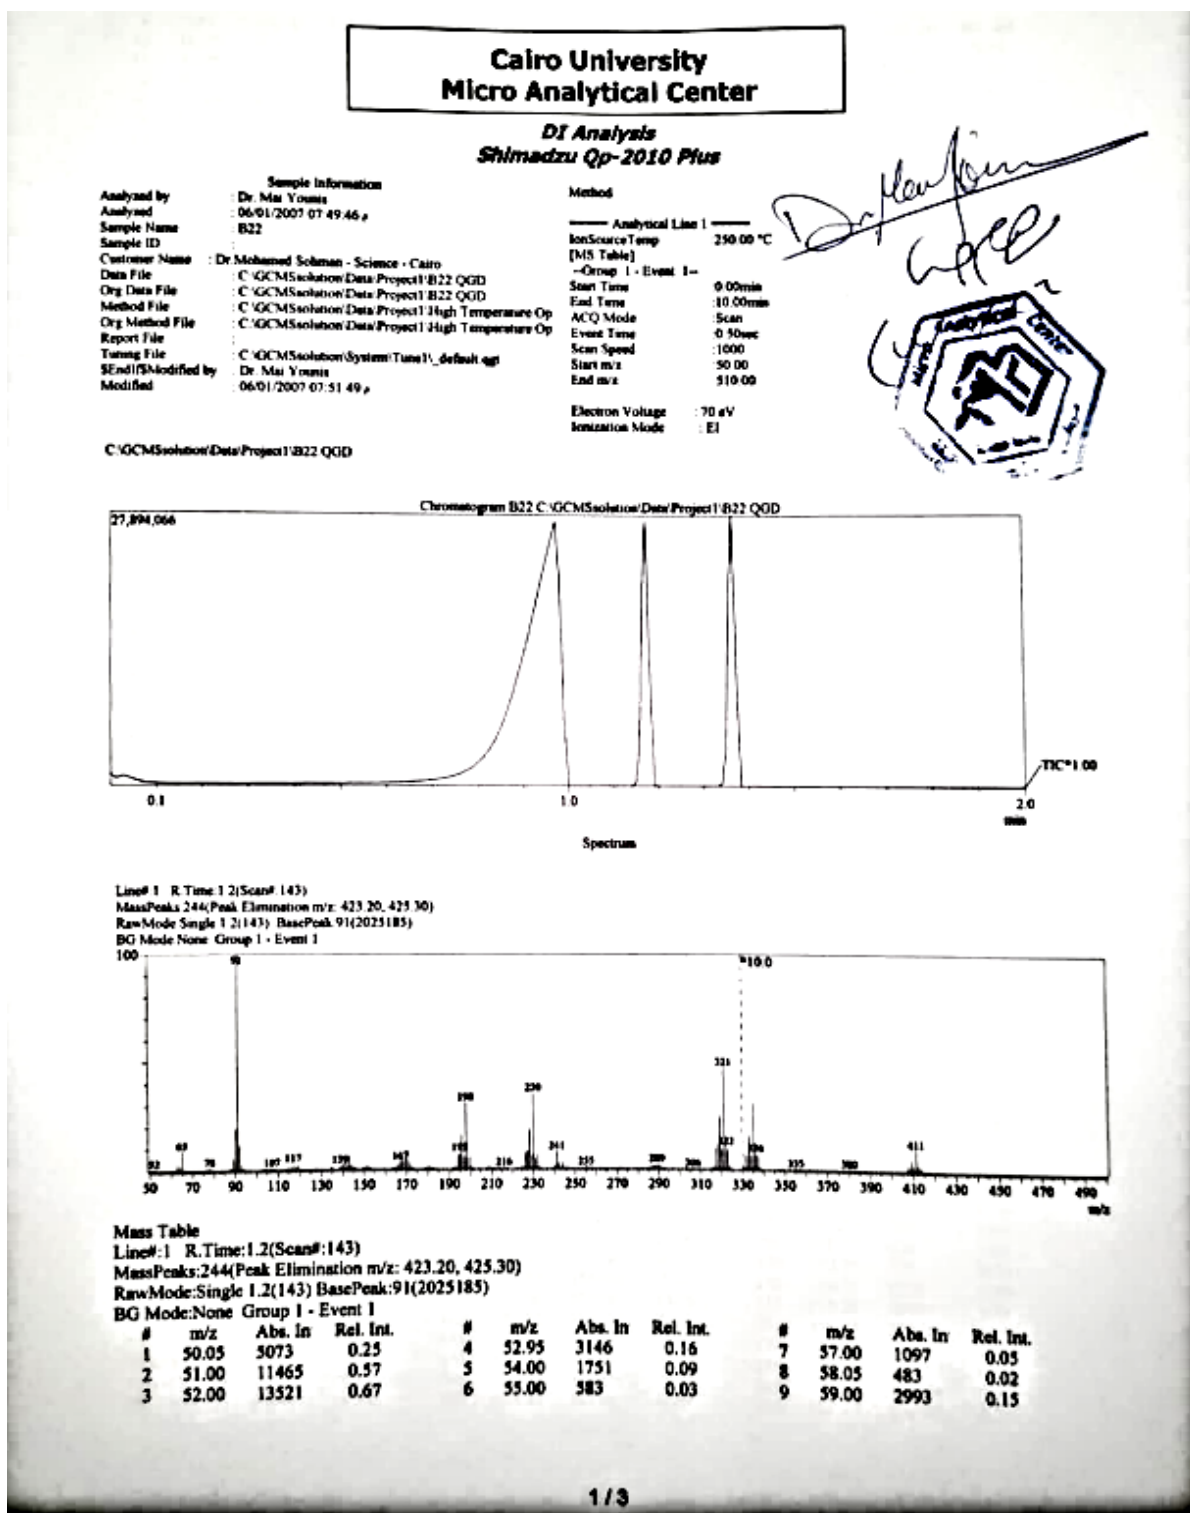

Figure S19. Mass chart of compound 5.

## Supporting Information

| #  | m/z    | Abs. Int. | Rel. Int. | #   | m/z    | Abs. Int. | Rel. Int. | #   | m/z    | Abs. Int. | Rel. Int. |
|----|--------|-----------|-----------|-----|--------|-----------|-----------|-----|--------|-----------|-----------|
| 10 | 60.05  | 391       | 0.02      | 79  | 129.05 | 9313      | 0.46      | 148 | 201.95 | 1028      | 0.05      |
| 11 | 61.05  | 3772      | 0.19      | 80  | 130.05 | 11086     | 0.55      | 149 | 204.25 | 5464      | 0.27      |
| 12 | 62.05  | 17107     | 0.84      | 81  | 131.10 | 5054      | 0.25      | 150 | 205.15 | 701       | 0.03      |
| 13 | 63.00  | 56926     | 2.81      | 82  | 132.05 | 10987     | 0.54      | 151 | 206.20 | 1020      | 0.05      |
| 14 | 64.05  | 36812     | 1.82      | 83  | 133.10 | 3684      | 0.18      | 152 | 207.25 | 2877      | 0.14      |
| 15 | 65.00  | 176463    | 8.71      | 84  | 134.15 | 9264      | 0.46      | 153 | 208.20 | 14284     | 0.71      |
| 16 | 65.95  | 12878     | 0.64      | 85  | 135.05 | 30121     | 1.49      | 154 | 209.15 | 17645     | 0.87      |
| 17 | 67.00  | 1580      | 0.08      | 86  | 136.05 | 4109      | 0.20      | 155 | 210.05 | 5896      | 0.29      |
| 18 | 68.05  | 483       | 0.02      | 87  | 137.05 | 5343      | 0.26      | 156 | 211.15 | 1898      | 0.09      |
| 19 | 69.10  | 985       | 0.05      | 88  | 138.05 | 7879      | 0.39      | 157 | 212.05 | 5471      | 0.27      |
| 20 | 70.10  | 1497      | 0.07      | 89  | 139.00 | 35607     | 1.76      | 158 | 213.10 | 2154      | 0.11      |
| 21 | 71.10  | 1663      | 0.08      | 90  | 140.05 | 41787     | 2.06      | 159 | 214.05 | 4336      | 0.21      |
| 22 | 72.05  | 379       | 0.02      | 91  | 141.00 | 77244     | 3.81      | 160 | 215.15 | 994       | 0.05      |
| 23 | 73.05  | 2080      | 0.10      | 92  | 142.05 | 47101     | 2.33      | 161 | 216.10 | 6855      | 0.34      |
| 24 | 74.05  | 4921      | 0.24      | 93  | 142.95 | 126329    | 6.25      | 162 | 217.05 | 395       | 0.02      |
| 25 | 75.05  | 5212      | 0.26      | 94  | 143.95 | 48735     | 2.41      | 163 | 218.10 | 921       | 0.05      |
| 26 | 76.05  | 6114      | 0.30      | 95  | 144.95 | 28945     | 1.43      | 164 | 221.20 | 846       | 0.04      |
| 27 | 77.05  | 10886     | 0.54      | 96  | 146.05 | 23129     | 1.14      | 165 | 223.15 | 1595      | 0.08      |
| 28 | 78.05  | 20811     | 1.03      | 97  | 146.95 | 4067      | 0.20      | 166 | 224.10 | 14468     | 0.71      |
| 29 | 79.05  | 8101      | 0.40      | 98  | 148.15 | 1843      | 0.09      | 167 | 225.15 | 19403     | 0.96      |
| 30 | 80.00  | 5090      | 0.25      | 99  | 149.15 | 8597      | 0.42      | 168 | 226.10 | 153471    | 7.58      |
| 31 | 81.05  | 1605      | 0.08      | 100 | 150.15 | 20578     | 1.02      | 169 | 227.15 | 166163    | 8.20      |
| 32 | 82.15  | 1045      | 0.05      | 101 | 151.05 | 33271     | 1.64      | 170 | 228.10 | 368934    | 18.22     |
| 33 | 83.10  | 2590      | 0.13      | 102 | 152.05 | 32505     | 1.61      | 171 | 229.15 | 120571    | 5.95      |
| 34 | 84.15  | 2599      | 0.13      | 103 | 153.05 | 20872     | 1.03      | 172 | 230.10 | 706377    | 34.88     |
| 35 | 85.15  | 4470      | 0.22      | 104 | 154.05 | 7855      | 0.39      | 173 | 231.05 | 94541     | 4.67      |
| 36 | 86.05  | 4174      | 0.21      | 105 | 155.00 | 4855      | 0.24      | 174 | 232.10 | 132870    | 6.56      |
| 37 | 87.15  | 6312      | 0.31      | 106 | 155.95 | 3585      | 0.18      | 175 | 233.05 | 15116     | 0.75      |
| 38 | 88.15  | 20787     | 1.03      | 107 | 157.00 | 5398      | 0.17      | 176 | 234.05 | 960       | 0.05      |
| 39 | 89.15  | 110480    | 5.46      | 108 | 157.95 | 2693      | 0.13      | 177 | 238.15 | 969       | 0.05      |
| 40 | 90.15  | 391518    | 19.33     | 109 | 159.05 | 2274      | 0.11      | 178 | 239.25 | 4131      | 0.20      |
| 41 | 91.05  | 202518    | 100.00    | 110 | 160.05 | 4165      | 0.21      | 179 | 240.25 | 35113     | 1.73      |
| 42 | 92.05  | 228419    | 11.28     | 111 | 161.00 | 602       | 0.03      | 180 | 241.25 | 155831    | 7.69      |
| 43 | 93.05  | 46032     | 2.27      | 112 | 162.05 | 482       | 0.02      | 181 | 242.10 | 54386     | 2.69      |
| 44 | 94.00  | 4180      | 0.21      | 113 | 163.05 | 3714      | 0.18      | 182 | 243.15 | 12588     | 0.62      |
| 45 | 95.00  | 8522      | 0.42      | 114 | 164.05 | 12889     | 0.64      | 183 | 244.10 | 56178     | 2.77      |
| 46 | 96.15  | 1388      | 0.07      | 115 | 165.05 | 22436     | 1.11      | 184 | 245.05 | 8044      | 0.40      |
| 47 | 97.10  | 2596      | 0.13      | 116 | 166.05 | 47284     | 2.33      | 185 | 246.10 | 9770      | 0.48      |
| 48 | 98.10  | 2490      | 0.12      | 117 | 167.05 | 66556     | 3.29      | 186 | 247.10 | 1503      | 0.07      |
| 49 | 99.10  | 2721      | 0.13      | 118 | 168.00 | 102111    | 5.04      | 187 | 254.35 | 1823      | 0.09      |
| 50 | 100.15 | 911       | 0.04      | 119 | 169.05 | 77098     | 3.81      | 188 | 255.25 | 10721     | 0.53      |
| 51 | 101.10 | 2750      | 0.14      | 120 | 169.95 | 174770    | 8.63      | 189 | 256.15 | 3888      | 0.19      |
| 52 | 102.10 | 4402      | 0.22      | 121 | 170.95 | 74461     | 3.68      | 190 | 257.15 | 1891      | 0.09      |
| 53 | 103.10 | 7242      | 0.36      | 122 | 172.00 | 39018     | 1.93      | 191 | 258.15 | 4289      | 0.21      |
| 54 | 104.05 | 11796     | 0.58      | 123 | 172.95 | 11808     | 0.58      | 192 | 259.15 | 3074      | 0.15      |
| 55 | 105.05 | 7012      | 0.35      | 124 | 173.95 | 1305      | 0.06      | 193 | 260.15 | 2910      | 0.14      |
| 56 | 106.10 | 11636     | 0.57      | 125 | 176.15 | 889       | 0.04      | 194 | 261.15 | 2231      | 0.11      |
| 57 | 107.05 | 13258     | 0.65      | 126 | 177.15 | 2401      | 0.12      | 195 | 262.20 | 1594      | 0.08      |
| 58 | 108.00 | 3873      | 0.19      | 127 | 178.15 | 5969      | 0.29      | 196 | 283.25 | 376       | 0.02      |
| 59 | 109.15 | 1378      | 0.07      | 128 | 179.15 | 10187     | 0.50      | 197 | 284.25 | 1803      | 0.09      |
| 60 | 110.05 | 979       | 0.05      | 129 | 180.15 | 36701     | 1.81      | 198 | 285.20 | 7185      | 0.35      |
| 61 | 111.05 | 2440      | 0.12      | 130 | 181.10 | 18865     | 0.93      | 199 | 286.20 | 14742     | 0.73      |
| 62 | 112.05 | 2793      | 0.14      | 131 | 182.15 | 14965     | 0.74      | 200 | 287.15 | 23239     | 1.15      |
| 63 | 113.05 | 9979      | 0.49      | 132 | 183.05 | 3441      | 0.17      | 201 | 288.20 | 24534     | 1.21      |
| 64 | 114.05 | 12822     | 0.63      | 133 | 184.00 | 2350      | 0.12      | 202 | 289.15 | 36611     | 1.81      |
| 65 | 115.00 | 27724     | 1.37      | 134 | 185.10 | 1281      | 0.06      | 203 | 290.15 | 36028     | 1.78      |
| 66 | 116.05 | 18052     | 0.89      | 135 | 186.05 | 1167      | 0.06      | 204 | 291.10 | 11612     | 0.57      |
| 67 | 117.00 | 53988     | 2.67      | 136 | 190.05 | 602       | 0.03      | 205 | 292.15 | 6462      | 0.32      |
| 68 | 118.05 | 26835     | 1.33      | 137 | 191.05 | 1736      | 0.09      | 206 | 293.15 | 552       | 0.03      |
| 69 | 119.05 | 43451     | 2.15      | 138 | 192.05 | 12467     | 0.62      | 207 | 306.20 | 302       | 0.01      |
| 70 | 120.05 | 15785     | 0.78      | 139 | 193.05 | 17901     | 0.88      | 208 | 308.10 | 636       | 0.03      |
| 71 | 121.10 | 4878      | 0.24      | 140 | 194.05 | 131489    | 6.49      | 209 | 310.05 | 707       | 0.03      |
| 72 | 122.05 | 2063      | 0.10      | 141 | 195.05 | 146464    | 7.23      | 210 | 314.25 | 1728      | 0.09      |
| 73 | 123.10 | 1527      | 0.08      | 142 | 196.00 | 323593    | 15.98     | 211 | 315.20 | 18481     | 0.91      |
| 74 | 124.05 | 682       | 0.03      | 143 | 197.05 | 113333    | 5.60      | 212 | 316.25 | 23945     | 1.18      |
| 75 | 125.05 | 4002      | 0.20      | 144 | 198.00 | 620129    | 30.62     | 213 | 317.20 | 196281    | 9.69      |
| 76 | 126.05 | 5459      | 0.27      | 145 | 198.95 | 99120     | 4.89      | 214 | 318.25 | 227987    | 11.26     |
| 77 | 127.05 | 10480     | 0.52      | 146 | 200.00 | 113441    | 5.60      | 215 | 319.20 | 494574    | 24.42     |
| 78 | 128.05 | 10844     | 0.54      | 147 | 200.95 | 16159     | 0.80      | 216 | 320.25 | 188395    | 9.30      |

Figure S20. Mass chart of compound 5.



## Supporting Information

| #   | m/z    | Abs. In | Rel. Int. | #   | m/z    | Abs. In | Rel. Int. | #   | m/z    | Abs. In | Rel. Int. |
|-----|--------|---------|-----------|-----|--------|---------|-----------|-----|--------|---------|-----------|
| 217 | 321.20 | 949119  | 46.87     | 227 | 334.25 | 12617   | 0.62      | 237 | 407.30 | 3812    | 0.19      |
| 218 | 322.15 | 206457  | 10.19     | 228 | 335.20 | 61590   | 3.04      | 238 | 408.35 | 4545    | 0.22      |
| 219 | 323.15 | 182324  | 9.00      | 229 | 336.15 | 14251   | 0.70      | 239 | 409.25 | 10425   | 0.51      |
| 220 | 324.05 | 37472   | 1.85      | 230 | 337.20 | 12284   | 0.61      | 240 | 410.35 | 4385    | 0.22      |
| 221 | 325.05 | 4024    | 0.20      | 231 | 338.15 | 2137    | 0.11      | 241 | 411.25 | 19850   | 0.98      |
| 222 | 329.25 | 824     | 0.04      | 232 | 347.20 | 470     | 0.02      | 242 | 412.25 | 5834    | 0.29      |
| 223 | 330.25 | 1720    | 0.08      | 233 | 349.20 | 1524    | 0.08      | 243 | 413.25 | 4131    | 0.20      |
| 224 | 331.20 | 13207   | 0.65      | 234 | 355.20 | 474     | 0.02      | 244 | 414.15 | 786     | 0.04      |
| 225 | 332.25 | 14297   | 0.71      | 235 | 378.20 | 226     | 0.01      |     |        |         |           |
| 226 | 333.20 | 31734   | 1.57      | 236 | 380.20 | 604     | 0.03      |     |        |         |           |

Figure S21. Mass chart of compound 5.

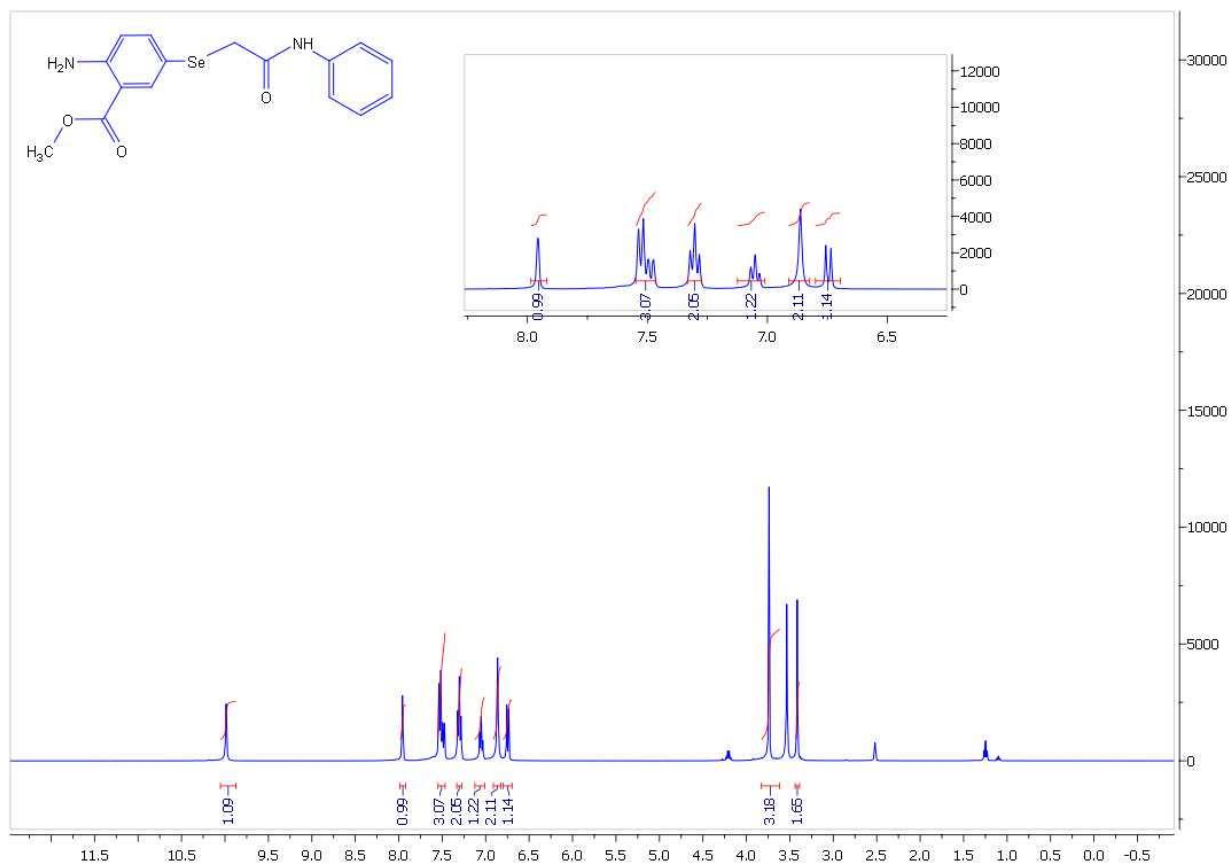

Figure S22.  $^1\text{H}$  NMR chart of compound 6.

## Supporting Information

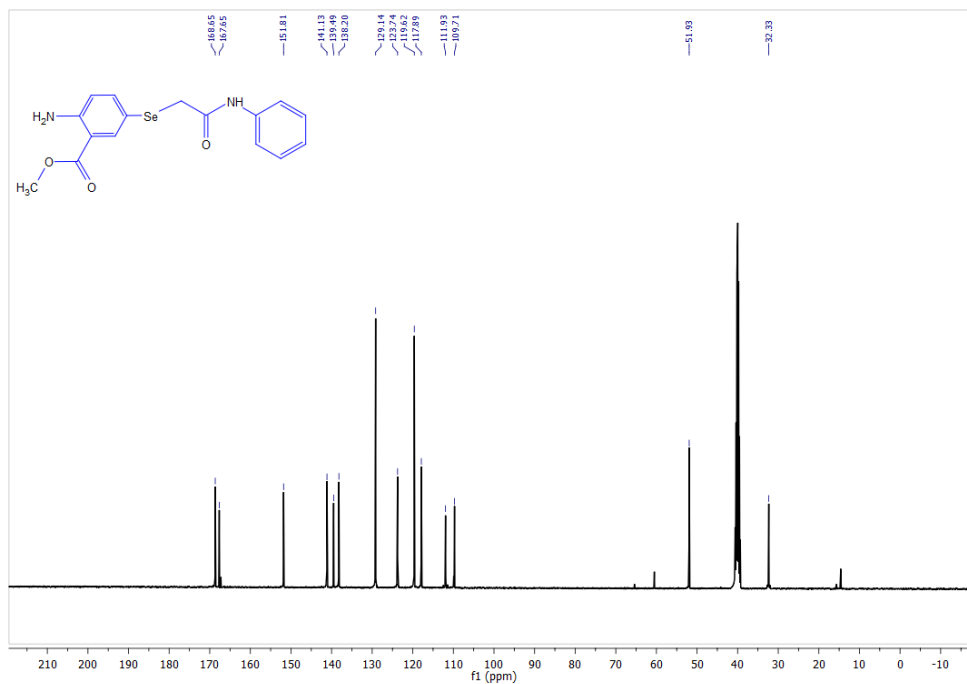

Figure S23.  $^{13}\text{C}$  NMR chart of compound 6.

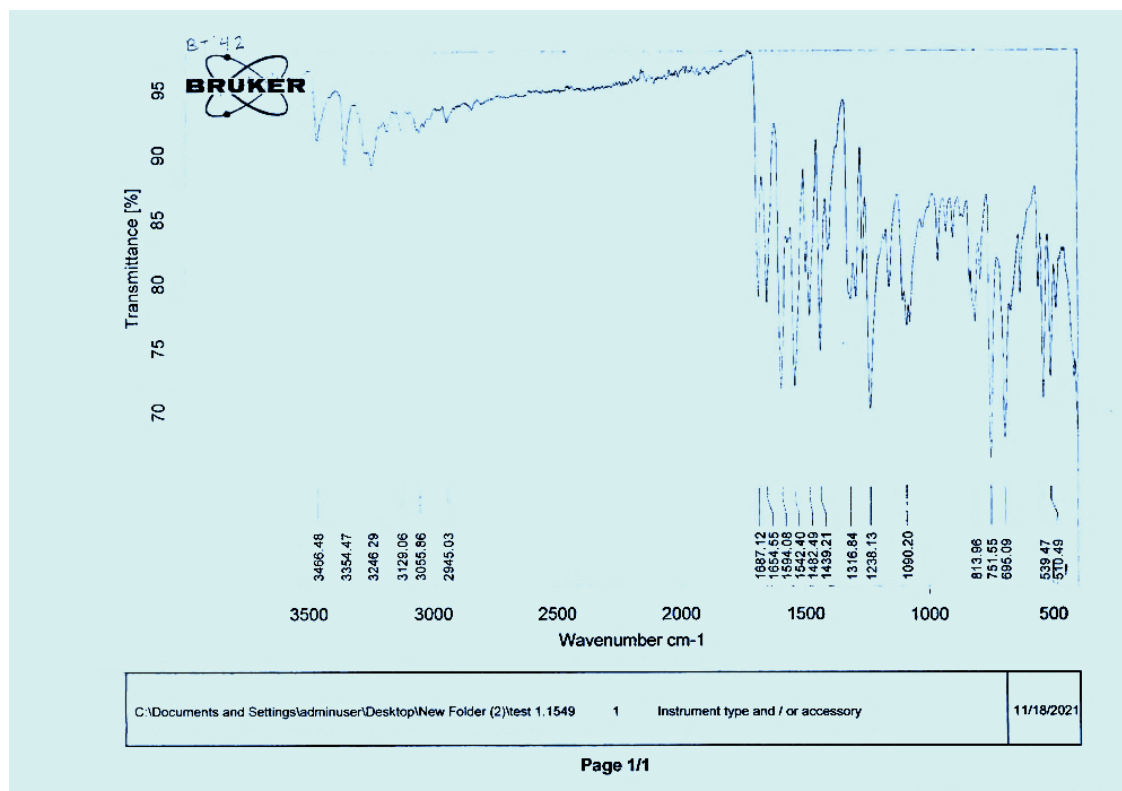

Figure S24. IR chart of compound 6.

# Supporting Information

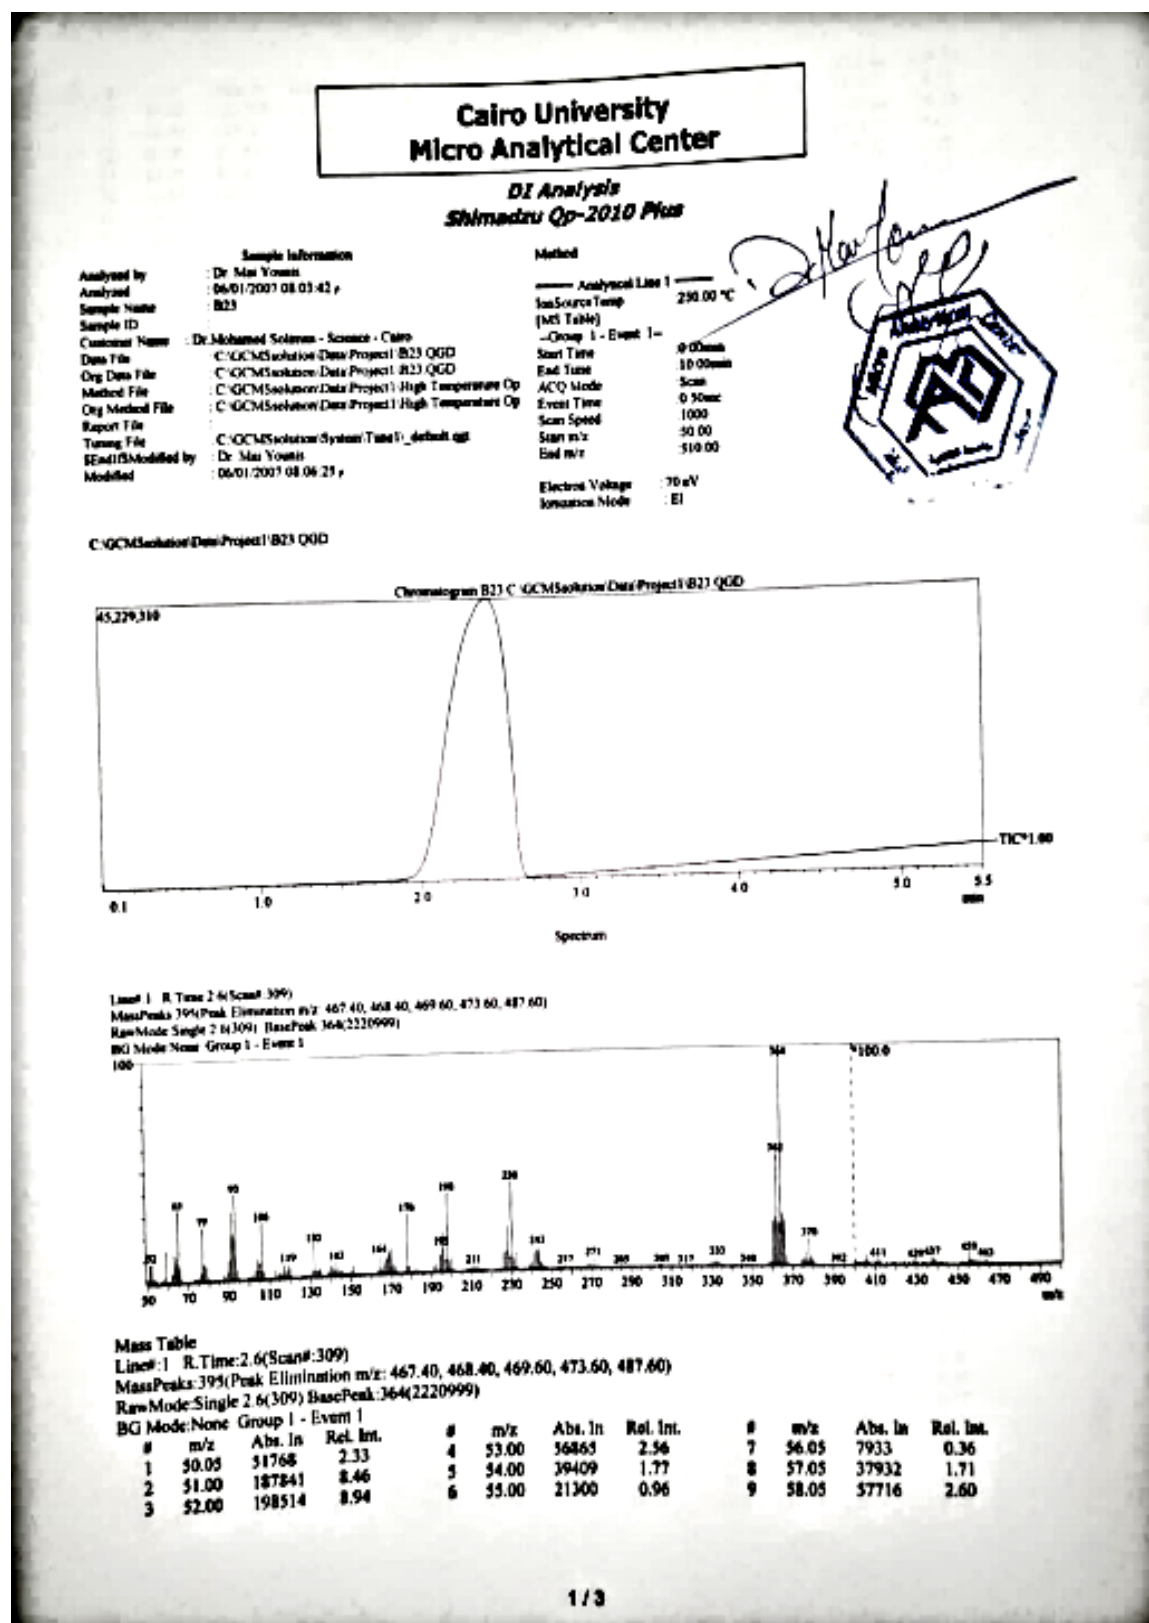

Figure S25. Mass chart of compound 6.

## Supporting Information

| #  | m/z    | Abs. In | Rel. Int. | #   | m/z    | Abs. In | Rel. Int. | #   | m/z    | Abs. In | Rel. Int. |
|----|--------|---------|-----------|-----|--------|---------|-----------|-----|--------|---------|-----------|
| 10 | 59.00  | 323380  | 14.56     | 79  | 128.15 | 17920   | 0.81      | 148 | 197.05 | 127657  | 5.75      |
| 11 | 60.00  | 19518   | 0.88      | 80  | 129.15 | 16582   | 0.75      | 149 | 198.00 | 802486  | 36.13     |
| 12 | 61.05  | 25294   | 1.14      | 81  | 130.15 | 23991   | 1.08      | 150 | 198.95 | 111117  | 5.00      |
| 13 | 62.05  | 85663   | 3.86      | 82  | 131.15 | 62358   | 2.81      | 151 | 200.00 | 147049  | 6.62      |
| 14 | 63.05  | 284974  | 12.83     | 83  | 132.10 | 333977  | 15.04     | 152 | 201.00 | 27327   | 1.23      |
| 15 | 64.05  | 230676  | 11.29     | 84  | 133.15 | 66067   | 2.97      | 153 | 202.05 | 6591    | 0.30      |
| 16 | 65.00  | 718538  | 32.35     | 85  | 134.15 | 78340   | 3.53      | 154 | 203.15 | 3651    | 0.16      |
| 17 | 66.00  | 152620  | 6.87      | 86  | 135.15 | 69517   | 3.13      | 155 | 204.15 | 2634    | 0.12      |
| 18 | 66.95  | 28433   | 1.28      | 87  | 136.15 | 11769   | 0.53      | 156 | 205.10 | 8610    | 0.39      |
| 19 | 68.05  | 8877    | 0.40      | 88  | 137.10 | 7681    | 0.35      | 157 | 206.05 | 3512    | 0.16      |
| 20 | 69.05  | 15359   | 0.69      | 89  | 138.15 | 13090   | 0.59      | 158 | 207.05 | 11680   | 0.53      |
| 21 | 70.05  | 8547    | 0.38      | 90  | 139.15 | 52322   | 2.36      | 159 | 208.05 | 15928   | 0.72      |
| 22 | 71.05  | 14796   | 0.67      | 91  | 140.10 | 117575  | 5.29      | 160 | 209.05 | 33769   | 1.52      |
| 23 | 72.05  | 7256    | 0.33      | 92  | 141.05 | 90195   | 4.06      | 161 | 210.05 | 30291   | 1.36      |
| 24 | 73.05  | 29968   | 1.35      | 93  | 142.05 | 52676   | 2.37      | 162 | 211.05 | 55042   | 2.48      |
| 25 | 74.05  | 26922   | 1.21      | 94  | 143.00 | 141599  | 6.38      | 163 | 212.05 | 30408   | 1.37      |
| 26 | 75.05  | 38018   | 1.71      | 95  | 144.00 | 54009   | 2.43      | 164 | 213.05 | 31320   | 1.41      |
| 27 | 76.05  | 89648   | 4.04      | 96  | 145.05 | 43425   | 1.96      | 165 | 214.05 | 18869   | 0.85      |
| 28 | 77.05  | 535908  | 24.13     | 97  | 146.05 | 54032   | 2.43      | 166 | 215.05 | 9367    | 0.42      |
| 29 | 78.05  | 171575  | 7.73      | 98  | 147.10 | 12569   | 0.57      | 167 | 216.05 | 19840   | 0.89      |
| 30 | 79.05  | 144276  | 6.50      | 99  | 148.10 | 17756   | 0.80      | 168 | 217.05 | 4333    | 0.20      |
| 31 | 80.05  | 37639   | 1.69      | 100 | 149.15 | 8208    | 0.37      | 169 | 218.05 | 4479    | 0.20      |
| 32 | 81.05  | 11176   | 0.50      | 101 | 150.15 | 38743   | 1.74      | 170 | 219.10 | 2612    | 0.12      |
| 33 | 82.15  | 5419    | 0.24      | 102 | 151.10 | 102964  | 4.64      | 171 | 220.10 | 778     | 0.04      |
| 34 | 83.10  | 15562   | 0.70      | 103 | 152.05 | 16710   | 0.75      | 172 | 221.15 | 1397    | 0.06      |
| 35 | 84.15  | 7935    | 0.36      | 104 | 153.10 | 11177   | 0.50      | 173 | 222.15 | 1142    | 0.05      |
| 36 | 85.10  | 16374   | 0.74      | 105 | 154.10 | 14711   | 0.66      | 174 | 223.15 | 4881    | 0.22      |
| 37 | 86.15  | 16002   | 0.72      | 106 | 155.05 | 15641   | 0.70      | 175 | 224.05 | 17976   | 0.81      |
| 38 | 87.10  | 69636   | 3.14      | 107 | 156.05 | 11100   | 0.50      | 176 | 225.15 | 20916   | 0.94      |
| 39 | 88.15  | 32733   | 1.47      | 108 | 157.05 | 15214   | 0.69      | 177 | 226.10 | 174902  | 7.87      |
| 40 | 89.15  | 88448   | 3.98      | 109 | 158.05 | 8233    | 0.37      | 178 | 227.15 | 189200  | 8.52      |
| 41 | 90.15  | 210874  | 9.49      | 110 | 159.10 | 16986   | 0.76      | 179 | 228.05 | 447454  | 20.15     |
| 42 | 91.10  | 688561  | 31.00     | 111 | 160.05 | 4503    | 0.20      | 180 | 229.15 | 133404  | 6.01      |
| 43 | 92.15  | 463765  | 20.88     | 112 | 161.15 | 4537    | 0.20      | 181 | 230.05 | 899020  | 40.48     |
| 44 | 93.10  | 862055  | 38.81     | 113 | 162.15 | 5173    | 0.23      | 182 | 231.05 | 114924  | 5.17      |
| 45 | 94.05  | 112139  | 5.05      | 114 | 163.15 | 35647   | 1.60      | 183 | 232.05 | 173318  | 7.80      |
| 46 | 95.00  | 27708   | 1.25      | 115 | 164.10 | 195450  | 8.80      | 184 | 233.05 | 21637   | 0.97      |
| 47 | 96.10  | 5274    | 0.24      | 116 | 165.05 | 50811   | 2.29      | 185 | 234.05 | 3484    | 0.16      |
| 48 | 97.10  | 9146    | 0.41      | 117 | 166.05 | 92270   | 4.15      | 186 | 235.15 | 3179    | 0.14      |
| 49 | 98.15  | 5237    | 0.24      | 118 | 167.05 | 149172  | 6.72      | 187 | 236.15 | 3807    | 0.17      |
| 50 | 99.10  | 12962   | 0.58      | 119 | 168.05 | 172761  | 7.78      | 188 | 237.05 | 8985    | 0.40      |
| 51 | 100.15 | 13487   | 0.61      | 120 | 169.05 | 226041  | 10.18     | 189 | 238.15 | 10887   | 0.49      |
| 52 | 101.10 | 60012   | 2.70      | 121 | 170.00 | 257615  | 11.60     | 190 | 239.10 | 48174   | 2.17      |
| 53 | 102.15 | 30642   | 1.38      | 122 | 171.00 | 96798   | 4.36      | 191 | 240.10 | 75681   | 3.41      |
| 54 | 103.15 | 88585   | 3.99      | 123 | 172.00 | 69998   | 3.15      | 192 | 241.10 | 157647  | 7.10      |
| 55 | 104.10 | 204116  | 9.19      | 124 | 173.00 | 21033   | 0.95      | 193 | 242.15 | 186228  | 8.38      |
| 56 | 105.15 | 159966  | 7.20      | 125 | 174.10 | 7897    | 0.36      | 194 | 243.10 | 230793  | 10.39     |
| 57 | 106.10 | 568420  | 25.59     | 126 | 175.15 | 17735   | 0.80      | 195 | 244.05 | 179124  | 8.07      |
| 58 | 107.10 | 76871   | 3.46      | 127 | 176.15 | 7737    | 0.35      | 196 | 245.05 | 65413   | 2.95      |
| 59 | 108.05 | 12580   | 0.57      | 128 | 177.15 | 62536   | 2.82      | 197 | 246.05 | 36727   | 1.63      |
| 60 | 109.10 | 3719    | 0.17      | 129 | 178.10 | 605762  | 27.27     | 198 | 247.20 | 22822   | 1.03      |
| 61 | 110.15 | 3039    | 0.14      | 130 | 179.05 | 72024   | 3.24      | 199 | 248.15 | 7827    | 0.35      |
| 62 | 111.15 | 9856    | 0.44      | 131 | 180.05 | 20815   | 0.94      | 200 | 249.15 | 2124    | 0.10      |
| 63 | 112.15 | 15347   | 0.69      | 132 | 181.10 | 26969   | 1.21      | 201 | 250.25 | 1855    | 0.08      |
| 64 | 113.10 | 93678   | 4.22      | 133 | 182.05 | 36544   | 1.65      | 202 | 251.20 | 7351    | 0.33      |
| 65 | 114.15 | 34219   | 1.54      | 134 | 183.10 | 28086   | 1.26      | 203 | 252.15 | 3123    | 0.14      |
| 66 | 115.10 | 49390   | 2.22      | 135 | 184.05 | 26423   | 1.19      | 204 | 253.15 | 6626    | 0.30      |
| 67 | 116.15 | 38664   | 1.74      | 136 | 185.00 | 19938   | 0.90      | 205 | 254.15 | 7024    | 0.32      |
| 68 | 117.10 | 130407  | 5.87      | 137 | 186.00 | 10751   | 0.48      | 206 | 255.10 | 19212   | 0.87      |
| 69 | 118.15 | 63644   | 2.87      | 138 | 187.05 | 6516    | 0.29      | 207 | 256.15 | 19273   | 0.87      |
| 70 | 119.10 | 142945  | 6.44      | 139 | 188.25 | 4750    | 0.21      | 208 | 257.10 | 29007   | 1.31      |
| 71 | 120.10 | 98100   | 4.42      | 140 | 189.15 | 25047   | 1.13      | 209 | 258.15 | 10175   | 0.46      |
| 72 | 121.05 | 14291   | 0.64      | 141 | 190.15 | 9994    | 0.45      | 210 | 259.20 | 21718   | 0.98      |
| 73 | 122.10 | 5969    | 0.27      | 142 | 191.15 | 57570   | 2.59      | 211 | 260.15 | 6061    | 0.27      |
| 74 | 123.05 | 3081    | 0.14      | 143 | 192.10 | 82754   | 3.73      | 212 | 261.15 | 4356    | 0.20      |
| 75 | 124.15 | 1538    | 0.07      | 144 | 193.05 | 33585   | 1.51      | 213 | 262.15 | 3391    | 0.15      |
| 76 | 125.15 | 3955    | 0.18      | 145 | 194.05 | 172249  | 7.76      | 214 | 263.15 | 3353    | 0.15      |
| 77 | 126.15 | 7068    | 0.32      | 146 | 195.05 | 249002  | 11.21     | 215 | 264.10 | 1687    | 0.08      |
| 78 | 127.15 | 19469   | 0.88      | 147 | 196.00 | 413670  | 18.63     | 216 | 265.15 | 3515    | 0.16      |

Figure S26. Mass chart of compound 6.

## Supporting Information

| #   | m/z    | Abs. In | Rel. Int. | #   | m/z    | Abs. In | Rel. Int. | #   | m/z    | Abs. In | Rel. Int. |
|-----|--------|---------|-----------|-----|--------|---------|-----------|-----|--------|---------|-----------|
| 217 | 266.15 | 2637    | 0.12      | 277 | 326.15 | 836     | 0.04      | 337 | 387.30 | 279     | 0.01      |
| 218 | 267.10 | 18146   | 0.82      | 278 | 327.15 | 2834    | 0.13      | 338 | 388.25 | 396     | 0.02      |
| 219 | 268.15 | 20158   | 0.91      | 279 | 328.15 | 6030    | 0.27      | 339 | 389.35 | 651     | 0.03      |
| 220 | 269.10 | 46786   | 2.11      | 280 | 329.15 | 23275   | 1.05      | 340 | 390.25 | 1290    | 0.06      |
| 221 | 270.15 | 15694   | 0.71      | 281 | 330.15 | 29151   | 1.31      | 341 | 391.35 | 1022    | 0.05      |
| 222 | 271.10 | 96137   | 4.33      | 282 | 331.15 | 50733   | 2.26      | 342 | 392.30 | 1966    | 0.09      |
| 223 | 272.05 | 16070   | 0.72      | 283 | 332.15 | 33893   | 1.53      | 343 | 393.35 | 1297    | 0.06      |
| 224 | 273.10 | 21305   | 0.96      | 284 | 333.15 | 88344   | 3.98      | 344 | 394.30 | 940     | 0.04      |
| 225 | 274.05 | 3890    | 0.18      | 285 | 334.05 | 24078   | 1.08      | 345 | 395.30 | 473     | 0.02      |
| 226 | 275.15 | 1899    | 0.09      | 286 | 335.15 | 19856   | 0.89      | 346 | 396.45 | 384     | 0.02      |
| 227 | 276.25 | 1345    | 0.06      | 287 | 336.15 | 4538    | 0.20      | 347 | 397.50 | 1070    | 0.05      |
| 228 | 277.20 | 2796    | 0.13      | 288 | 337.15 | 1006    | 0.05      | 348 | 398.45 | 583     | 0.03      |
| 229 | 278.15 | 1433    | 0.06      | 289 | 338.25 | 662     | 0.03      | 349 | 399.45 | 317     | 0.01      |
| 230 | 279.15 | 898     | 0.04      | 290 | 339.30 | 1508    | 0.07      | 350 | 400.20 | 370     | 0.02      |
| 231 | 280.15 | 727     | 0.03      | 291 | 340.25 | 578     | 0.03      | 351 | 401.20 | 289     | 0.01      |
| 232 | 281.15 | 2478    | 0.11      | 292 | 341.25 | 684     | 0.03      | 352 | 402.20 | 230     | 0.01      |
| 233 | 282.15 | 2409    | 0.11      | 293 | 342.25 | 584     | 0.03      | 353 | 403.20 | 257     | 0.01      |
| 234 | 283.10 | 5790    | 0.26      | 294 | 343.25 | 805     | 0.04      | 354 | 404.45 | 336     | 0.02      |
| 235 | 284.15 | 3531    | 0.16      | 295 | 344.20 | 1958    | 0.09      | 355 | 405.40 | 1146    | 0.05      |
| 236 | 285.10 | 12303   | 0.55      | 296 | 345.25 | 2706    | 0.12      | 356 | 406.35 | 447     | 0.02      |
| 237 | 286.15 | 5148    | 0.23      | 297 | 346.20 | 3890    | 0.18      | 357 | 407.40 | 271     | 0.01      |
| 238 | 287.10 | 5833    | 0.26      | 298 | 347.25 | 4640    | 0.21      | 358 | 409.45 | 410     | 0.02      |
| 239 | 288.25 | 2633    | 0.12      | 299 | 348.20 | 7434    | 0.33      | 359 | 410.50 | 282     | 0.01      |
| 240 | 289.15 | 7201    | 0.32      | 300 | 349.15 | 2578    | 0.12      | 360 | 411.50 | 583     | 0.03      |
| 241 | 290.15 | 2396    | 0.12      | 301 | 350.15 | 2611    | 0.12      | 361 | 412.50 | 284     | 0.01      |
| 242 | 291.20 | 2186    | 0.10      | 302 | 351.20 | 977     | 0.04      | 362 | 415.50 | 254     | 0.01      |
| 243 | 292.15 | 1131    | 0.05      | 303 | 352.15 | 764     | 0.03      | 363 | 417.50 | 207     | 0.01      |
| 244 | 293.25 | 1594    | 0.07      | 304 | 353.25 | 847     | 0.04      | 364 | 418.50 | 257     | 0.01      |
| 245 | 294.25 | 1118    | 0.05      | 305 | 354.15 | 553     | 0.02      | 365 | 419.50 | 354     | 0.02      |
| 246 | 295.20 | 5345    | 0.24      | 306 | 355.25 | 657     | 0.03      | 366 | 421.50 | 326     | 0.01      |
| 247 | 296.15 | 1761    | 0.08      | 307 | 356.25 | 704     | 0.03      | 367 | 423.50 | 396     | 0.02      |
| 248 | 297.25 | 811     | 0.04      | 308 | 357.25 | 3443    | 0.16      | 368 | 425.50 | 250     | 0.01      |
| 249 | 298.35 | 617     | 0.03      | 309 | 358.20 | 42783   | 1.93      | 369 | 426.50 | 212     | 0.01      |
| 250 | 299.30 | 823     | 0.04      | 310 | 359.25 | 41697   | 1.88      | 370 | 428.55 | 430     | 0.02      |
| 251 | 300.25 | 1273    | 0.06      | 311 | 360.20 | 448631  | 20.20     | 371 | 429.50 | 458     | 0.02      |
| 252 | 301.25 | 1429    | 0.06      | 312 | 361.25 | 490508  | 22.09     | 372 | 430.30 | 231     | 0.01      |
| 253 | 302.25 | 2061    | 0.09      | 313 | 362.20 | 113024  | 50.89     | 373 | 432.30 | 222     | 0.01      |
| 254 | 303.30 | 3346    | 0.15      | 314 | 363.25 | 435043  | 19.50     | 374 | 433.30 | 212     | 0.01      |
| 255 | 304.35 | 3895    | 0.18      | 315 | 364.20 | 222099  | 100.00    | 375 | 434.30 | 201     | 0.01      |
| 256 | 305.30 | 14001   | 0.63      | 316 | 365.15 | 516139  | 23.24     | 376 | 436.40 | 250     | 0.01      |
| 257 | 306.20 | 5601    | 0.25      | 317 | 366.15 | 453240  | 20.41     | 377 | 437.45 | 688     | 0.03      |
| 258 | 307.15 | 2298    | 0.10      | 318 | 367.15 | 94607   | 4.26      | 378 | 438.35 | 497     | 0.02      |
| 259 | 308.15 | 902     | 0.04      | 319 | 368.15 | 13453   | 0.61      | 379 | 439.50 | 431     | 0.02      |
| 260 | 309.30 | 892     | 0.04      | 320 | 369.15 | 2332    | 0.10      | 380 | 441.50 | 303     | 0.01      |
| 261 | 310.25 | 583     | 0.03      | 321 | 370.30 | 4468    | 0.20      | 381 | 442.50 | 233     | 0.01      |
| 262 | 311.35 | 721     | 0.03      | 322 | 371.25 | 1831    | 0.08      | 382 | 444.50 | 210     | 0.01      |
| 263 | 312.35 | 712     | 0.03      | 323 | 372.20 | 3146    | 0.23      | 383 | 451.50 | 289     | 0.01      |
| 264 | 313.35 | 1160    | 0.05      | 324 | 373.25 | 5093    | 0.23      | 384 | 452.50 | 233     | 0.01      |
| 265 | 314.35 | 803     | 0.04      | 325 | 374.25 | 54806   | 2.47      | 385 | 454.45 | 304     | 0.01      |
| 266 | 315.35 | 918     | 0.04      | 326 | 375.25 | 61887   | 2.79      | 386 | 455.40 | 1105    | 0.05      |
| 267 | 316.35 | 904     | 0.04      | 327 | 376.20 | 144442  | 6.50      | 387 | 456.35 | 499     | 0.02      |
| 268 | 317.30 | 4386    | 0.20      | 328 | 377.25 | 48025   | 2.16      | 388 | 457.10 | 265     | 0.01      |
| 269 | 318.25 | 2391    | 0.11      | 329 | 378.20 | 271025  | 12.20     | 389 | 458.15 | 443     | 0.02      |
| 270 | 319.25 | 2801    | 0.13      | 330 | 379.15 | 67760   | 3.05      | 390 | 459.10 | 218     | 0.01      |
| 271 | 320.25 | 1770    | 0.08      | 331 | 380.20 | 56982   | 2.57      | 391 | 460.20 | 433     | 0.02      |
| 272 | 321.20 | 4260    | 0.19      | 332 | 381.15 | 13270   | 0.60      | 392 | 462.20 | 287     | 0.01      |
| 273 | 322.25 | 2058    | 0.09      | 333 | 382.15 | 2182    | 0.10      | 393 | 463.40 | 473     | 0.02      |
| 274 | 323.25 | 2501    | 0.11      | 334 | 383.20 | 484     | 0.02      | 394 | 464.40 | 252     | 0.01      |
| 275 | 324.25 | 848     | 0.04      | 335 | 384.20 | 236     | 0.01      | 395 | 466.40 | 212     | 0.01      |
| 276 | 325.15 | 508     | 0.02      | 336 | 386.20 | 215     | 0.01      |     |        |         |           |

Figure S27. Mass chart of compound 6.

## Supporting Information

### 4-((2-(methoxycarbonyl)-4-(methylselanyl)phenyl)amino)-4-oxobut-2-enoic acid (7)

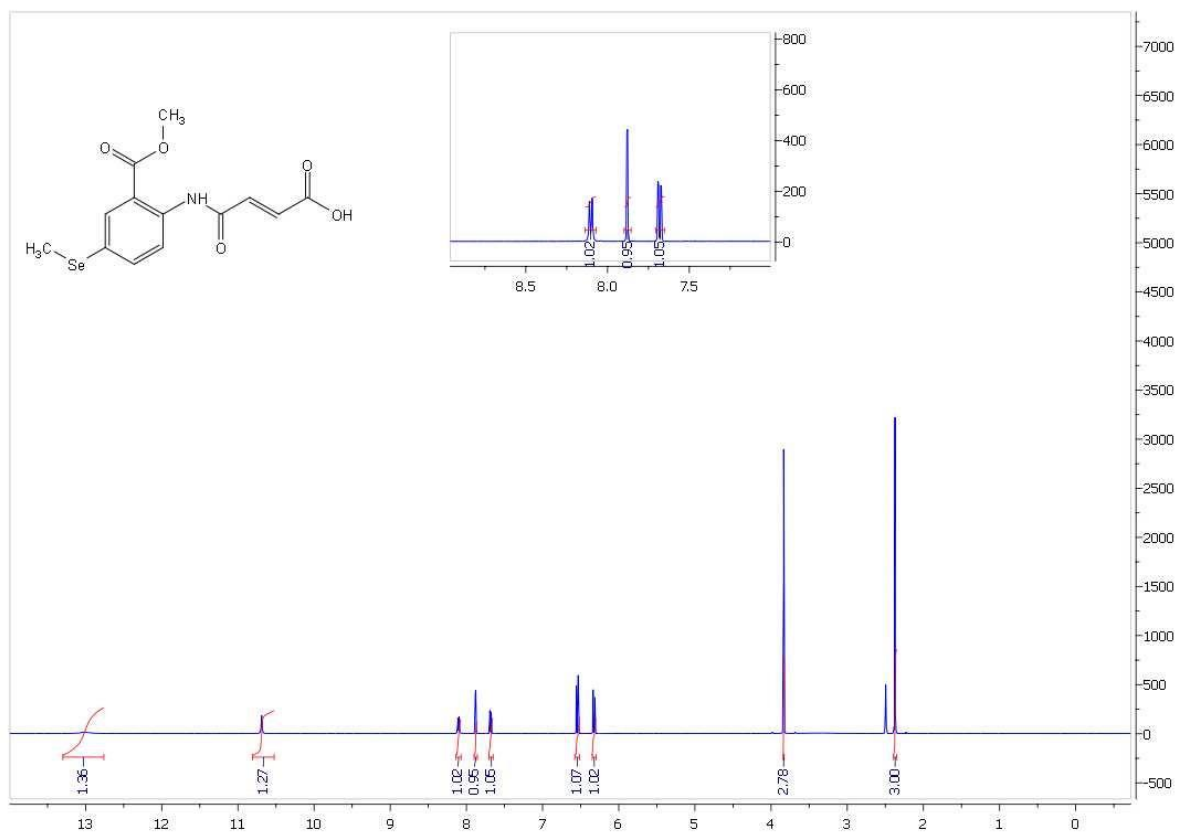

Figure S28. <sup>1</sup>H NMR chart of compound 7.

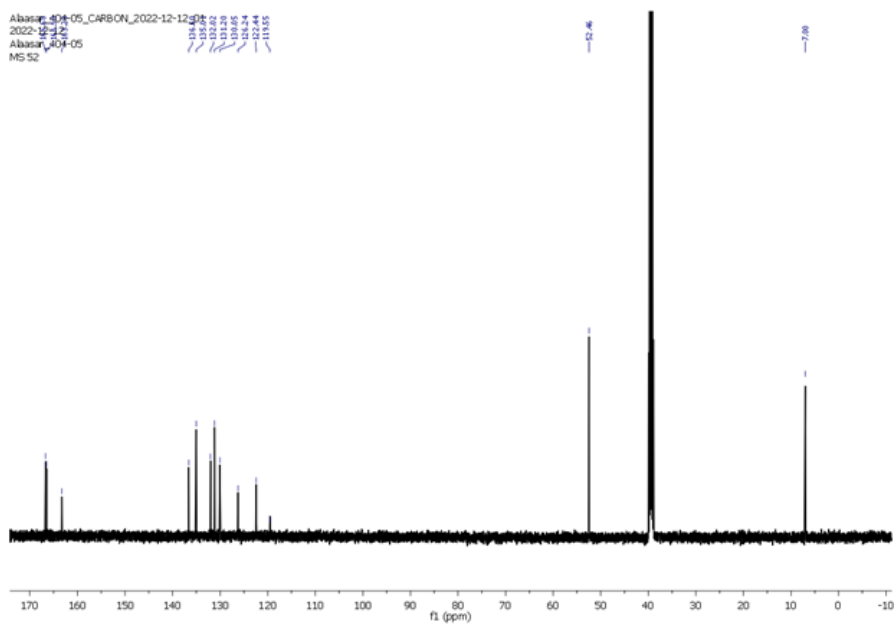

Figure S29. <sup>13</sup>C NMR chart of compound 7.

# Supporting Information

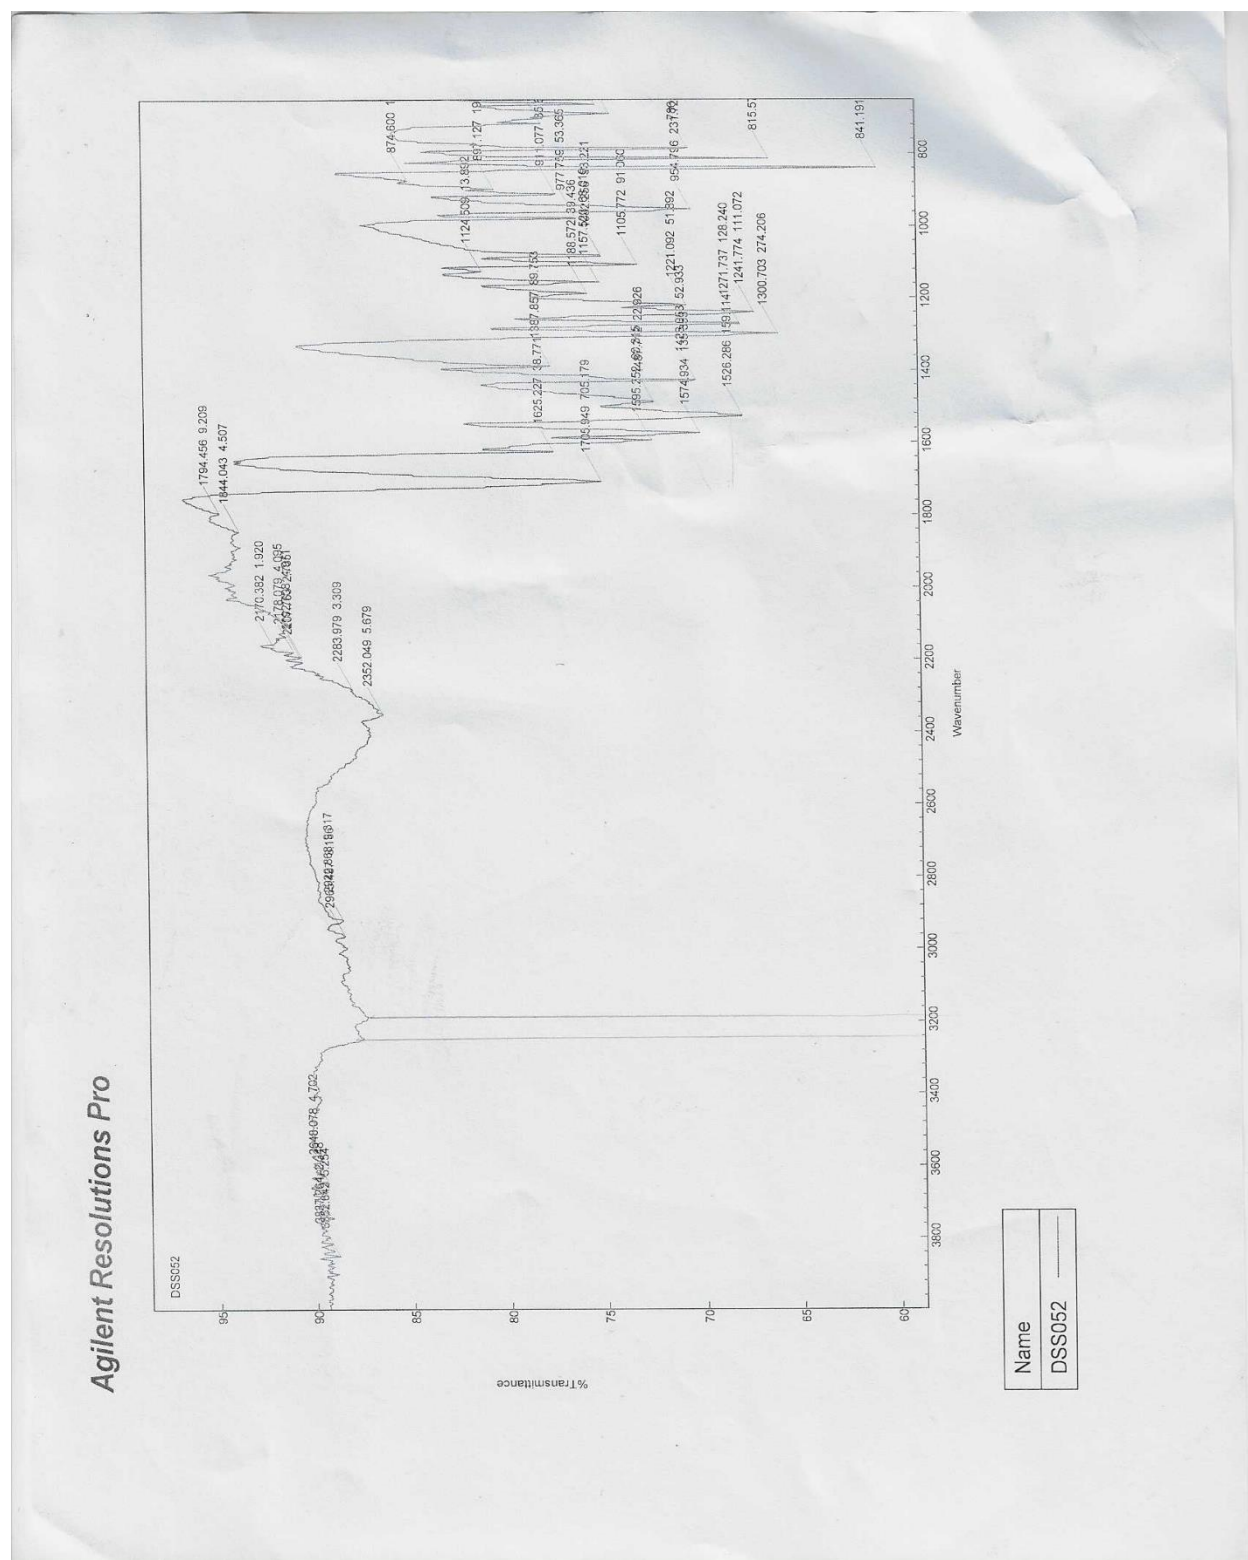

Figure S30. IR chart of compound 7.

## Supporting Information

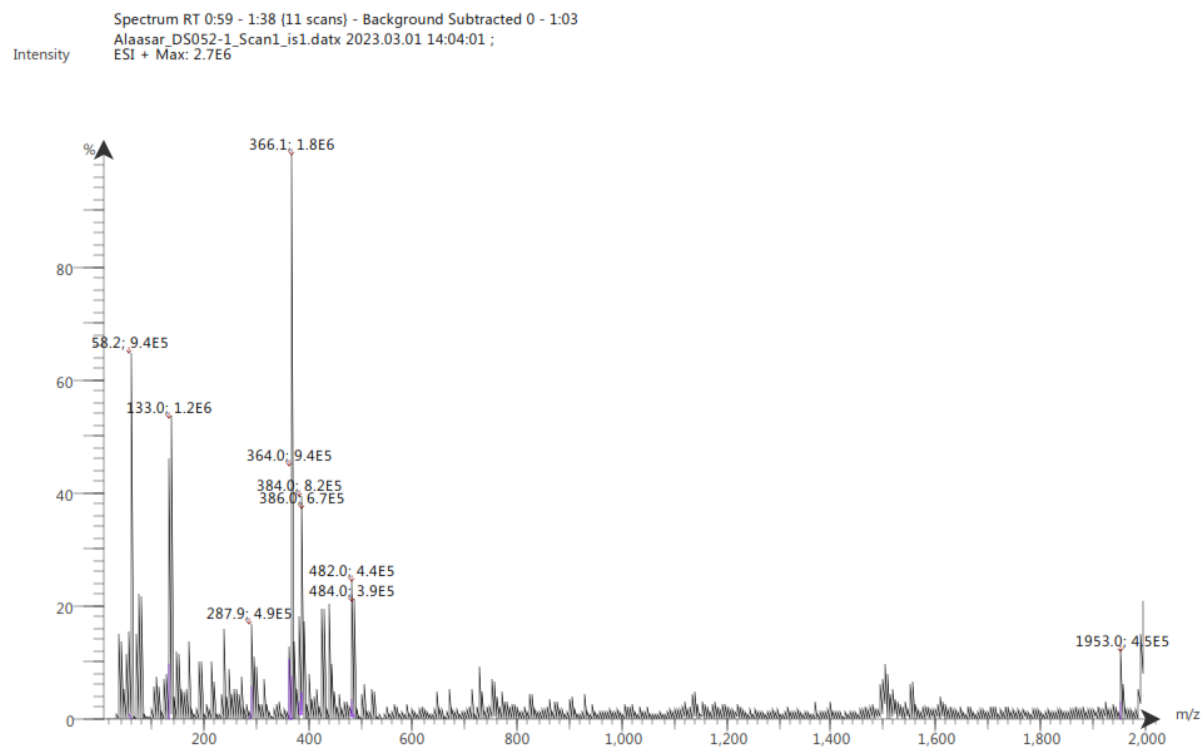

**Figure S31.** MS chart of compound 7.

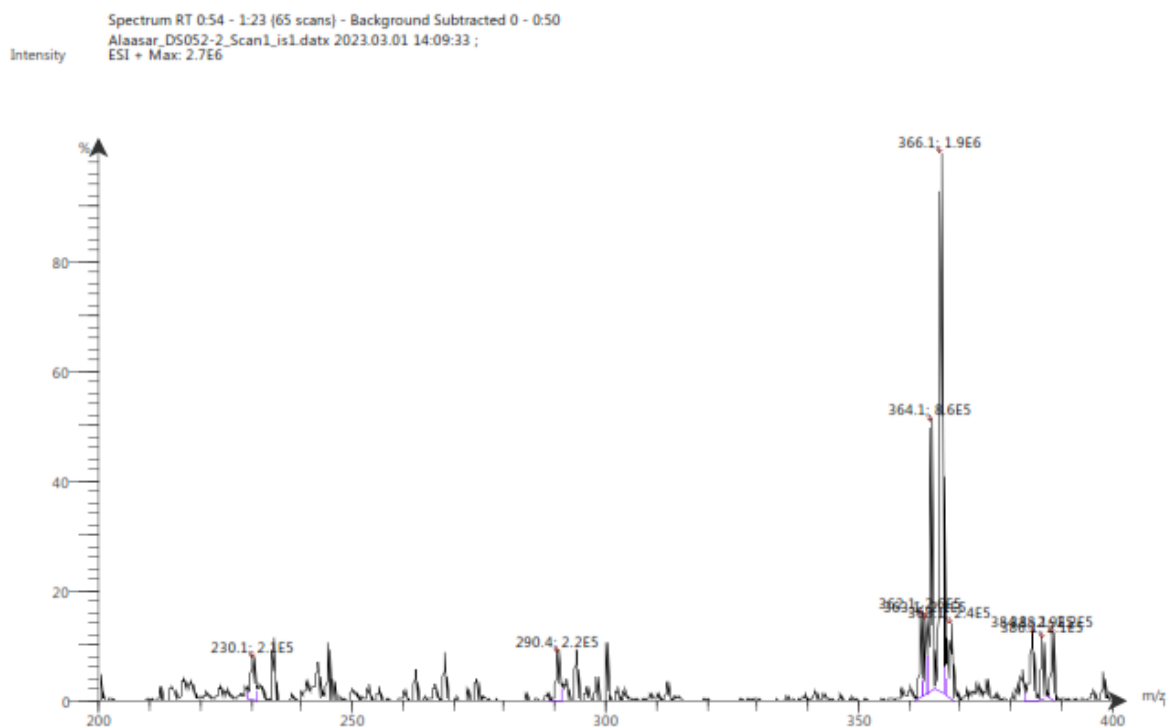

**Figure S32.** MS chart of compound 7.



## Supporting Information

### 4-((2-(methoxycarbonyl)-4-(methylselanyl)phenyl)amino)-4-oxobut-2-enoic acid (**8**)

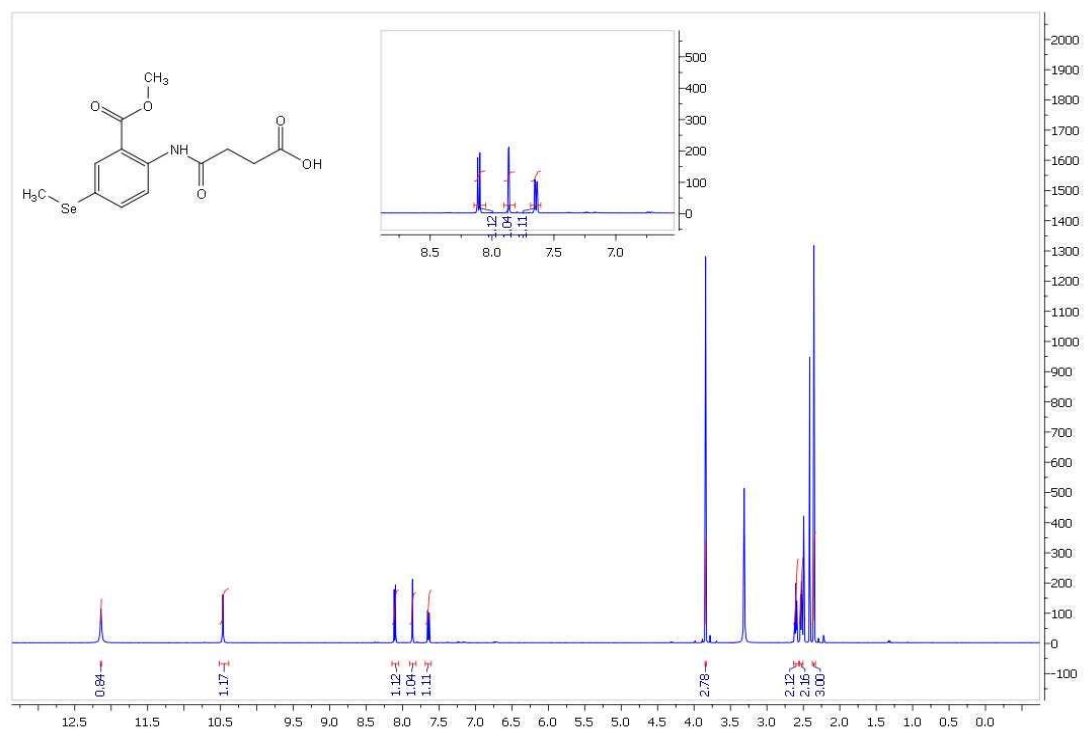

Figure S33. <sup>1</sup>H NMR chart of compound **8**.

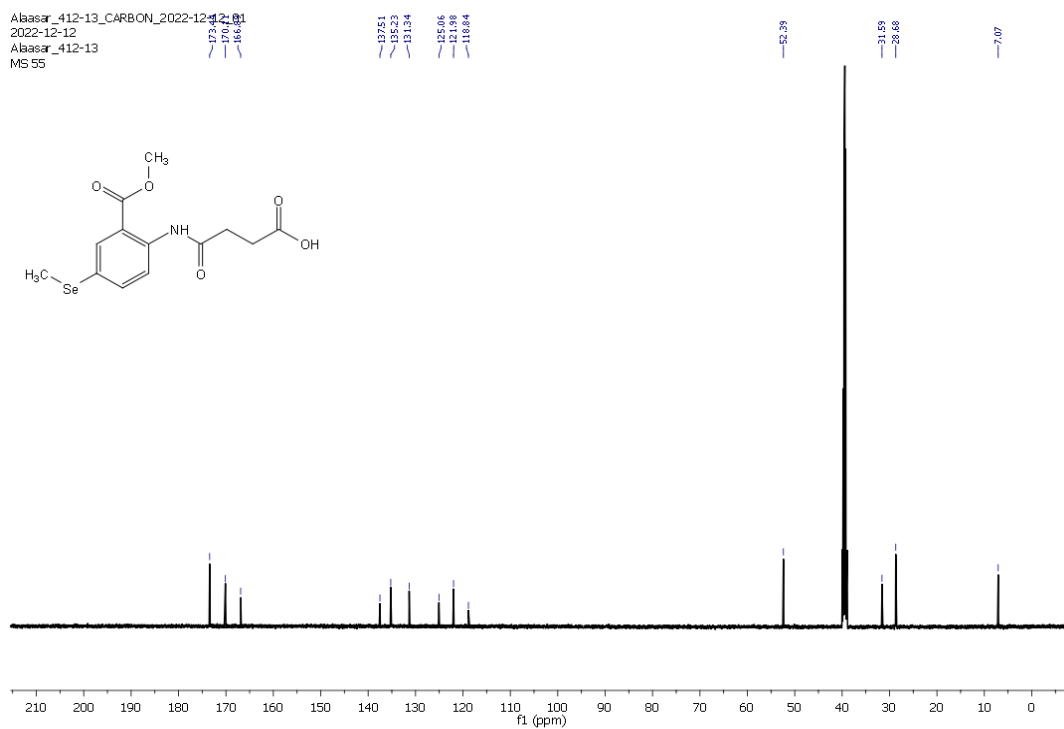

Figure S34. <sup>13</sup>C NMR chart of compound **8**.

# Supporting Information

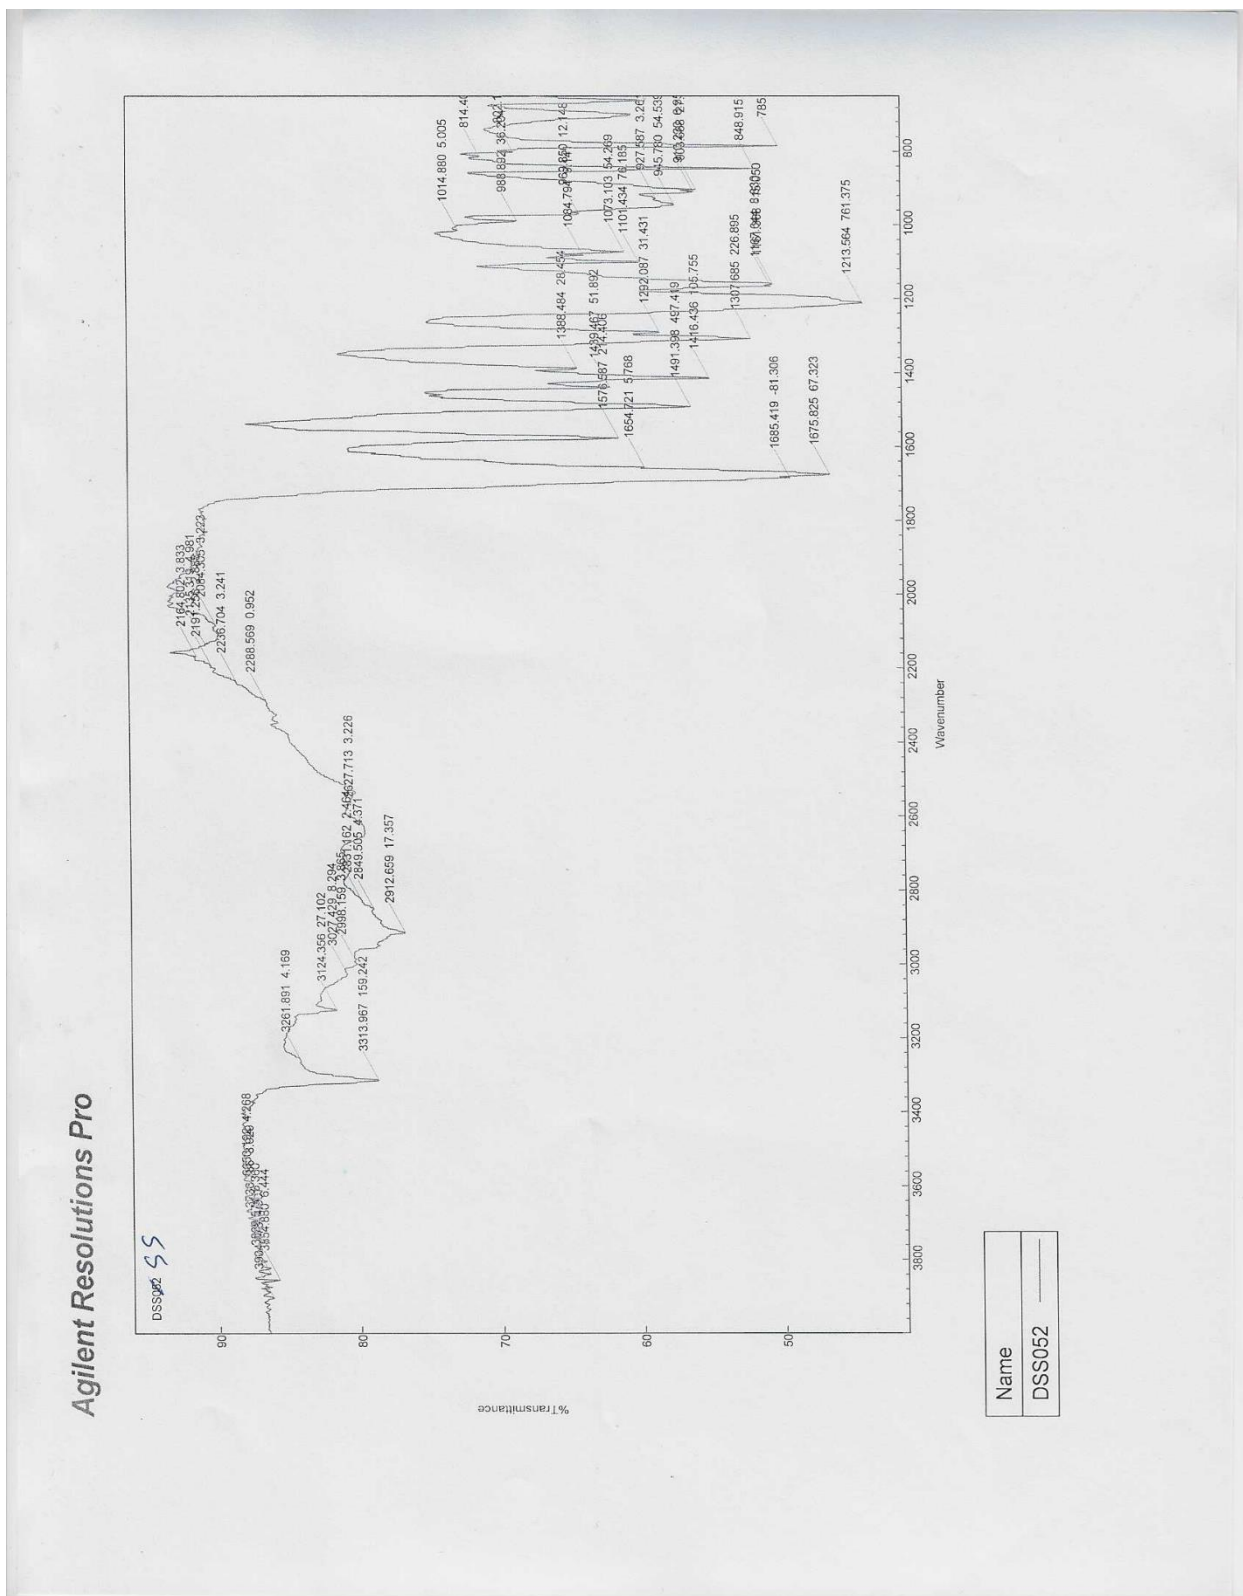

**Figure S35.** IR chart of compound **8**.

## Supporting Information

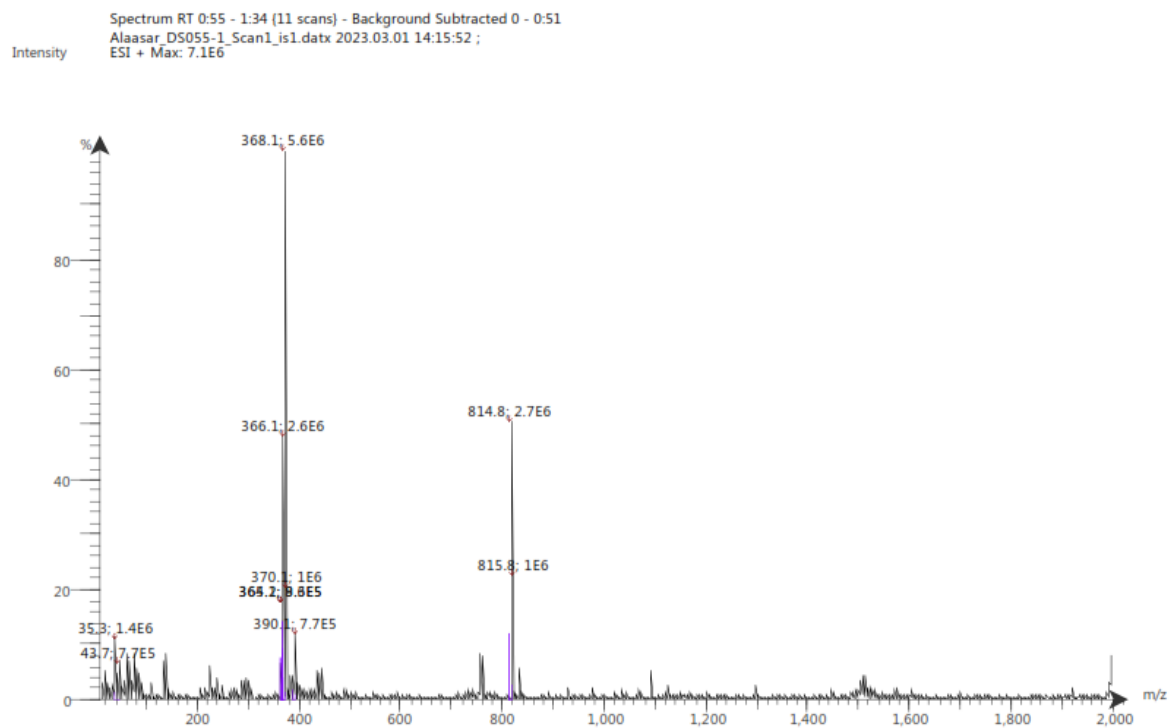

Figure S36. MS chart of compound 8.

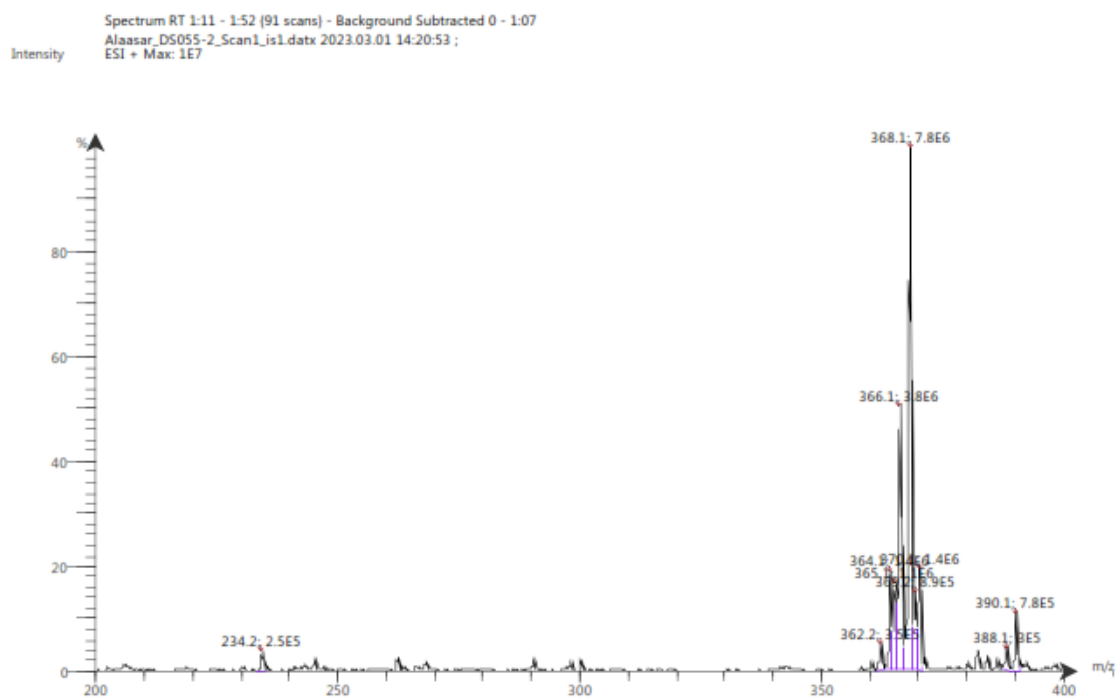

Figure S37. MS chart of compound 8.

## Supporting Information

4-((2-(methoxycarbonyl)-4-(methylselanyl)phenyl)amino)-4-oxobut-2-enoic acid (**9**)

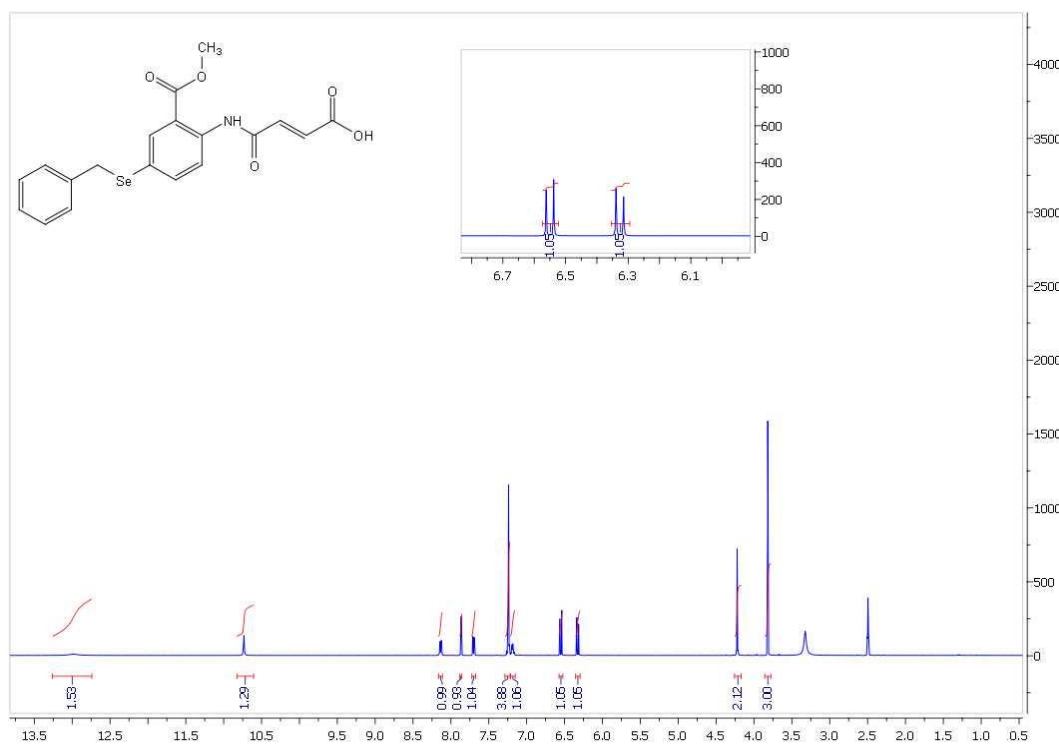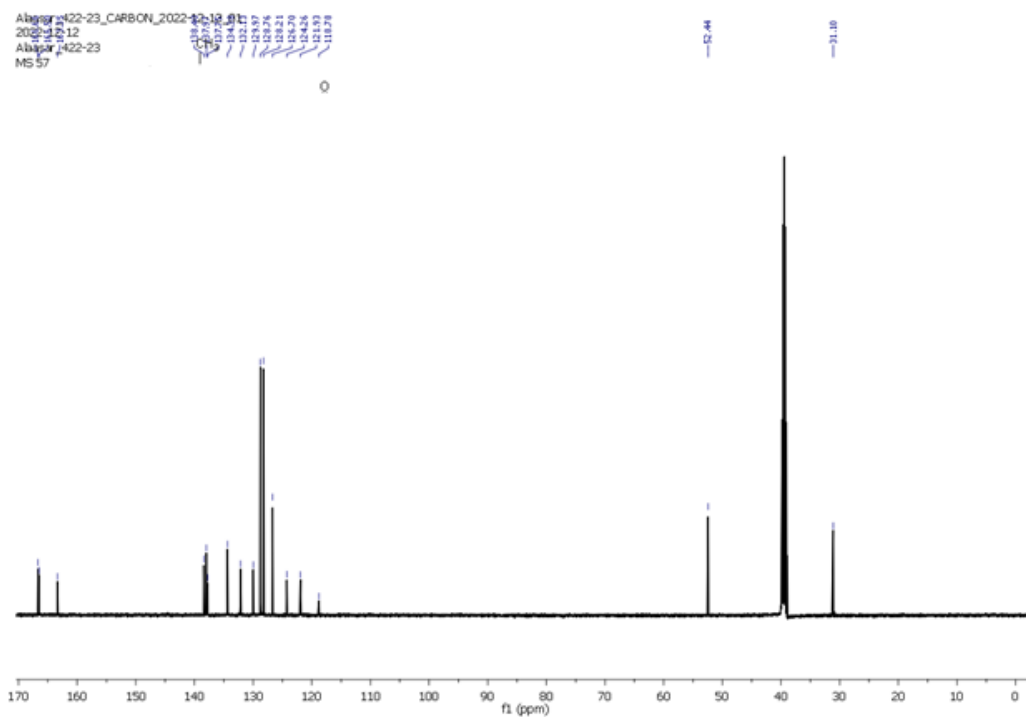

**Figure S39.**  $^{13}\text{C}$  NMR chart of compound **9**.

# Supporting Information

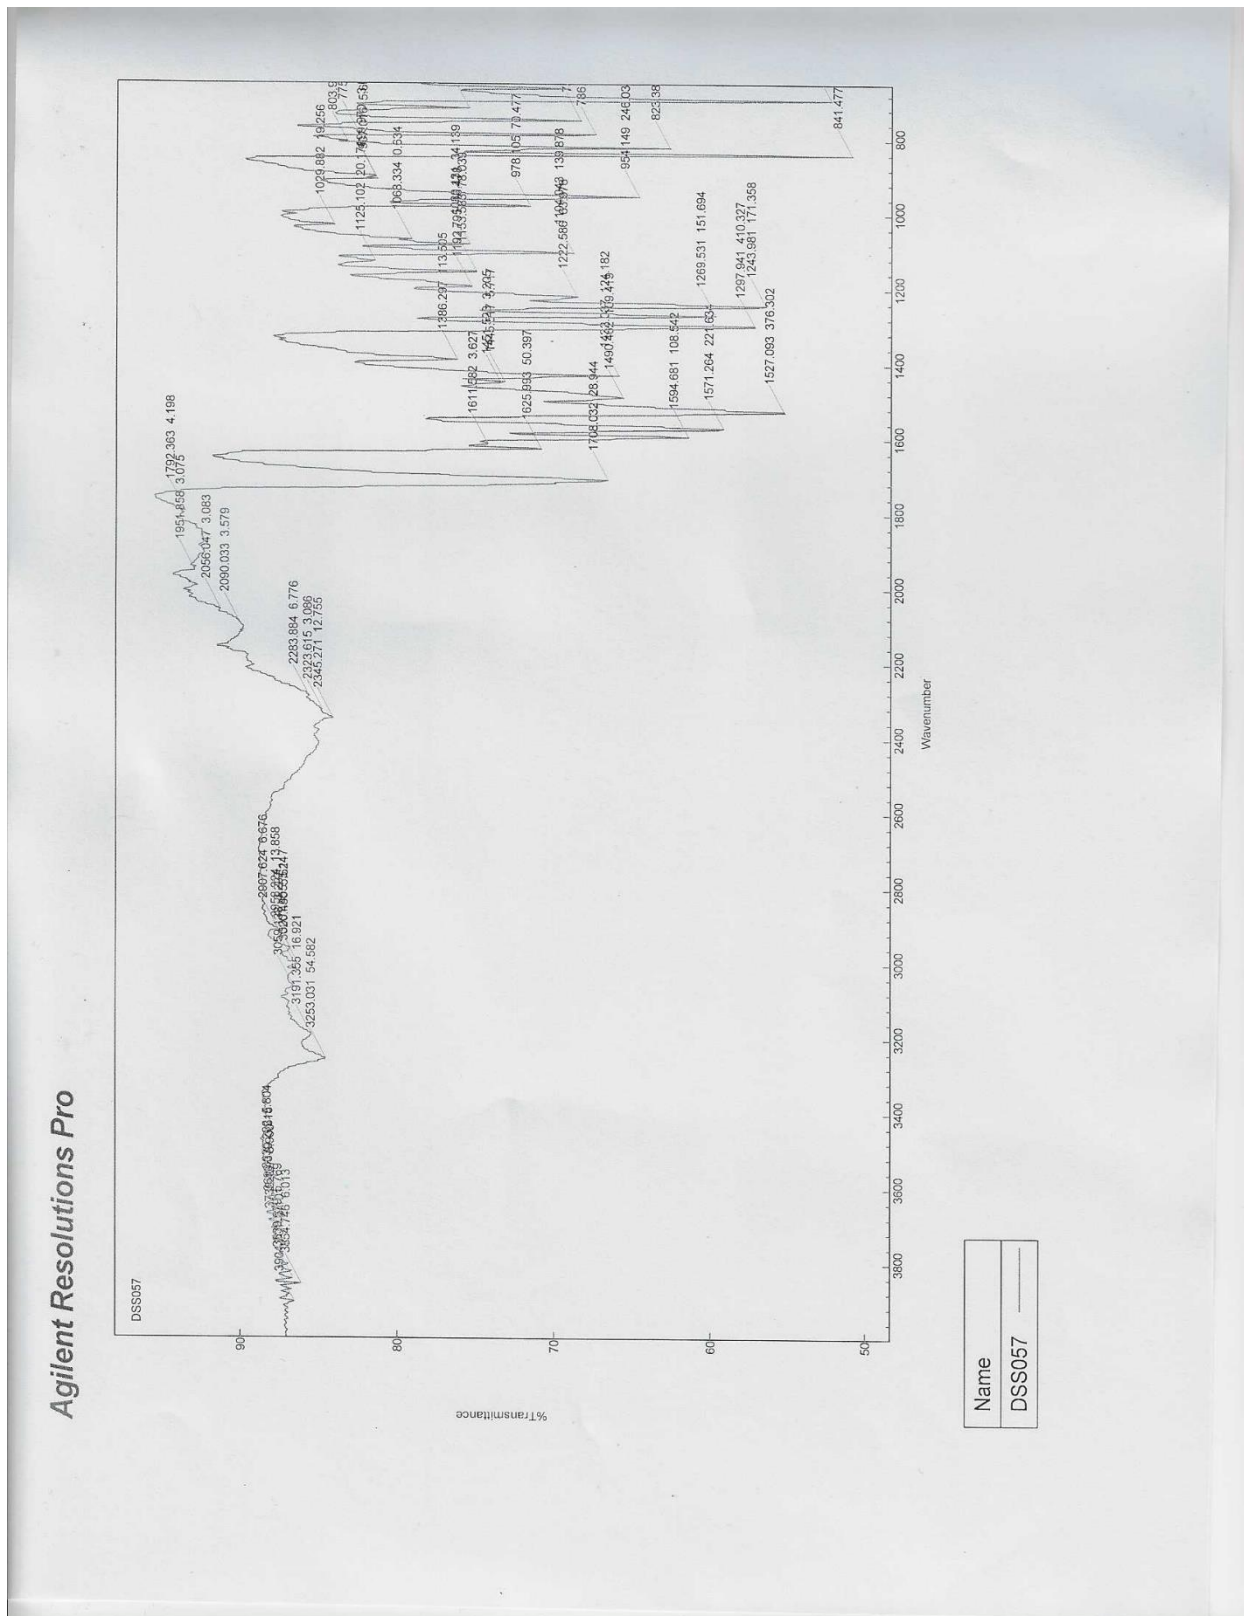

Figure S40. IR chart of compound 9.

## Supporting Information

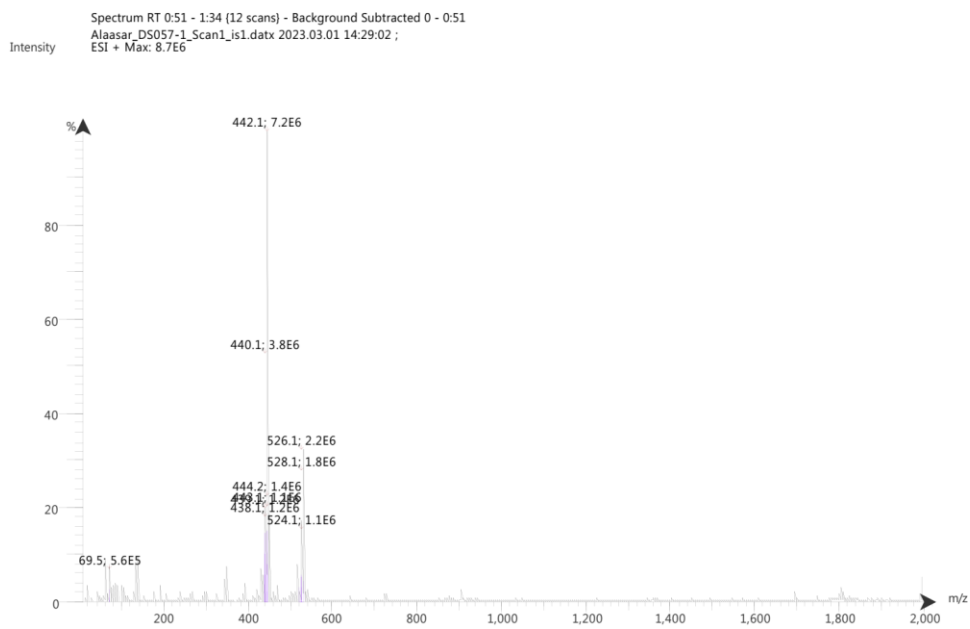

**Figure S41.** MS chart of compound **9**.

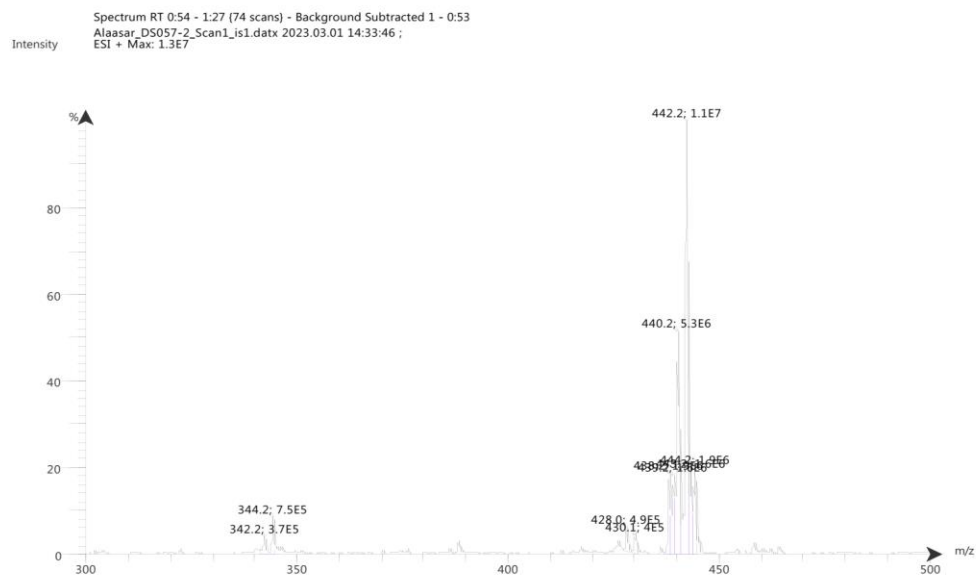

**Figure S42.** MS chart of compound **9**.

## Supporting Information

### 4-((2-(methoxycarbonyl)-4-(methylselanyl)phenyl)amino)-4-oxobut-2-enoic acid (**10**)

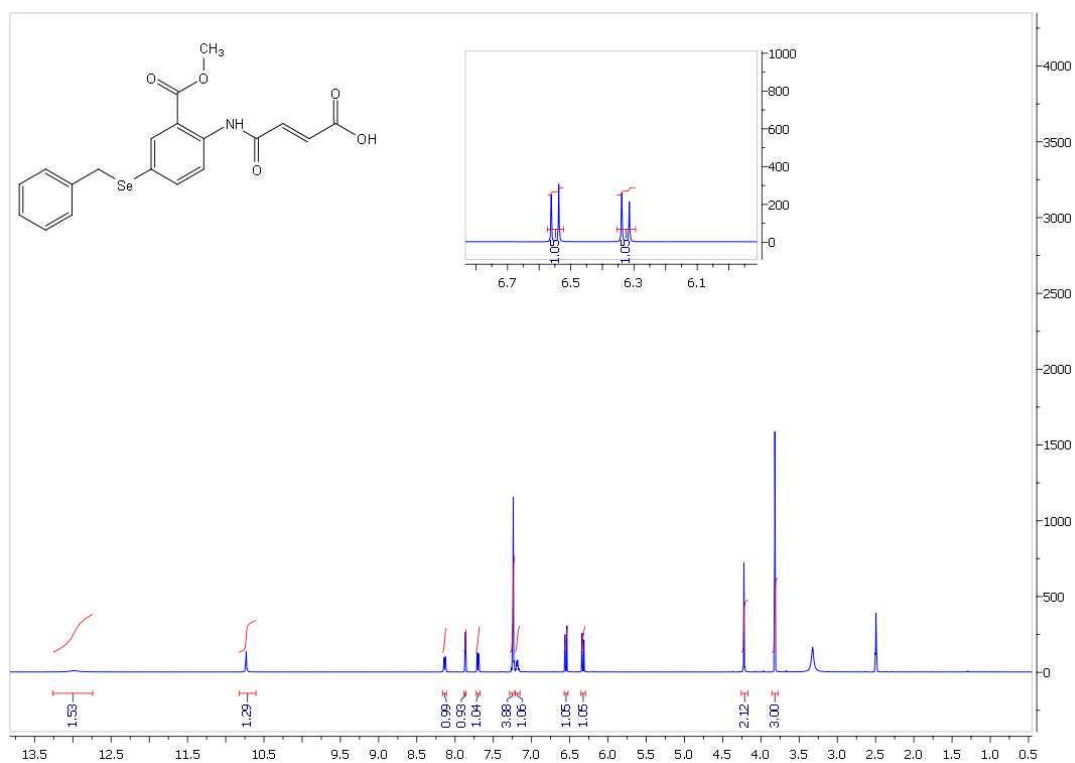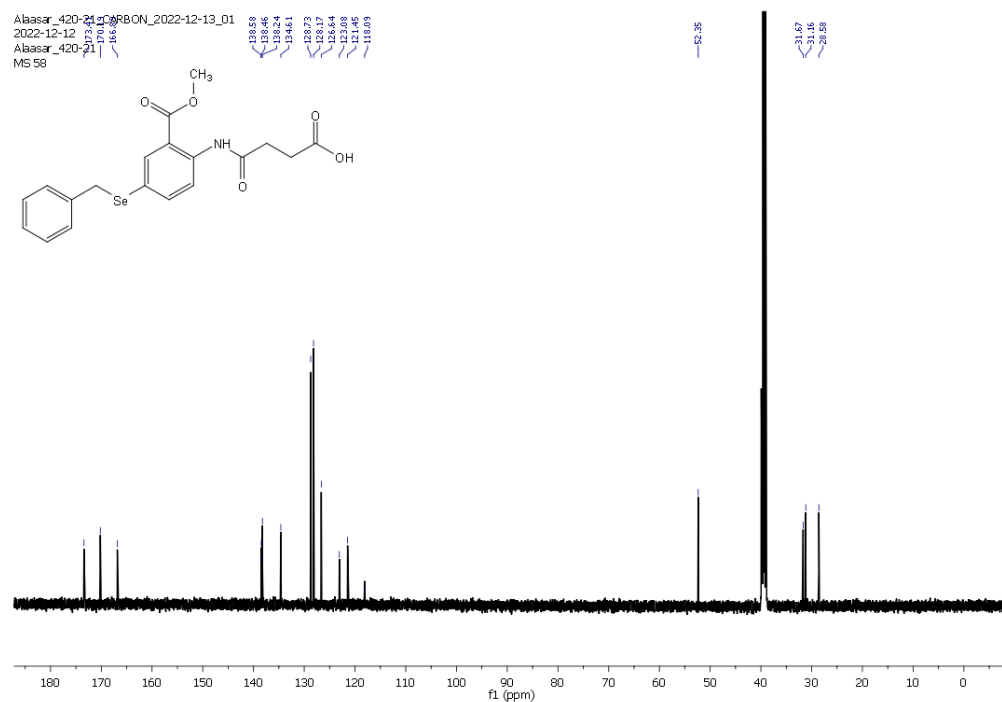

Supporting Information

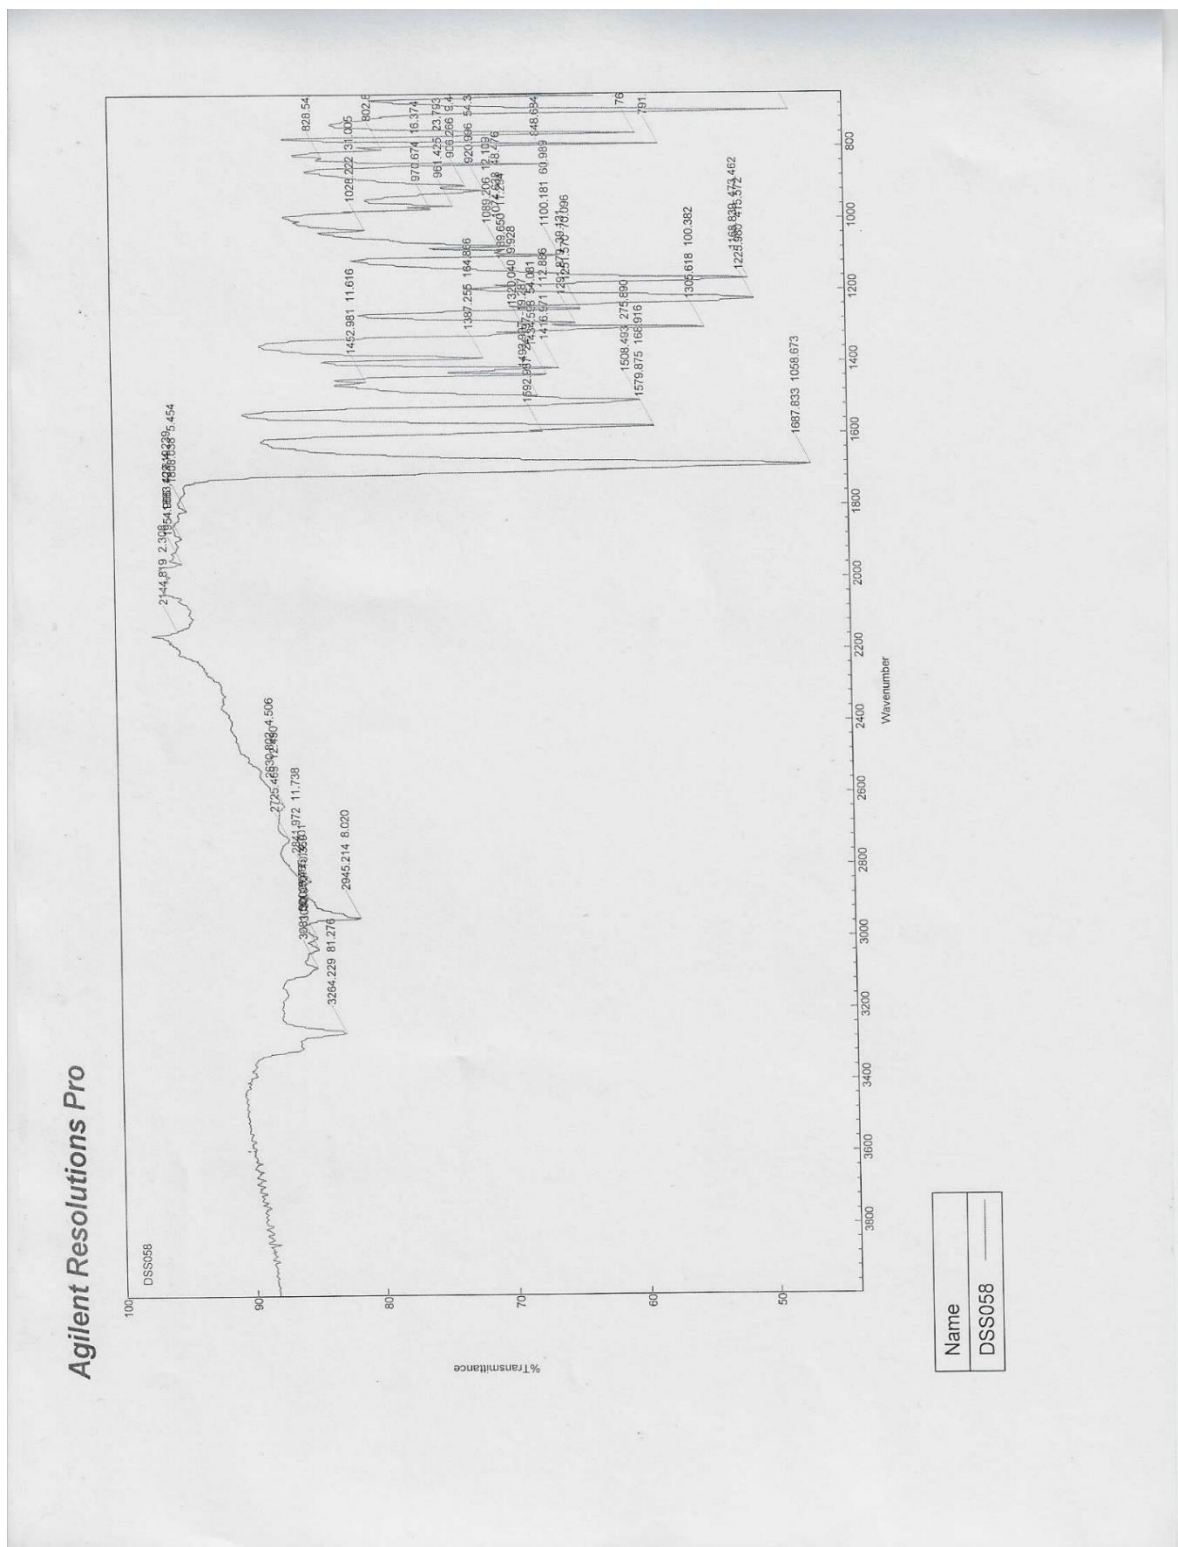

Figure S45. IR chart of compound 10.



## Supporting Information

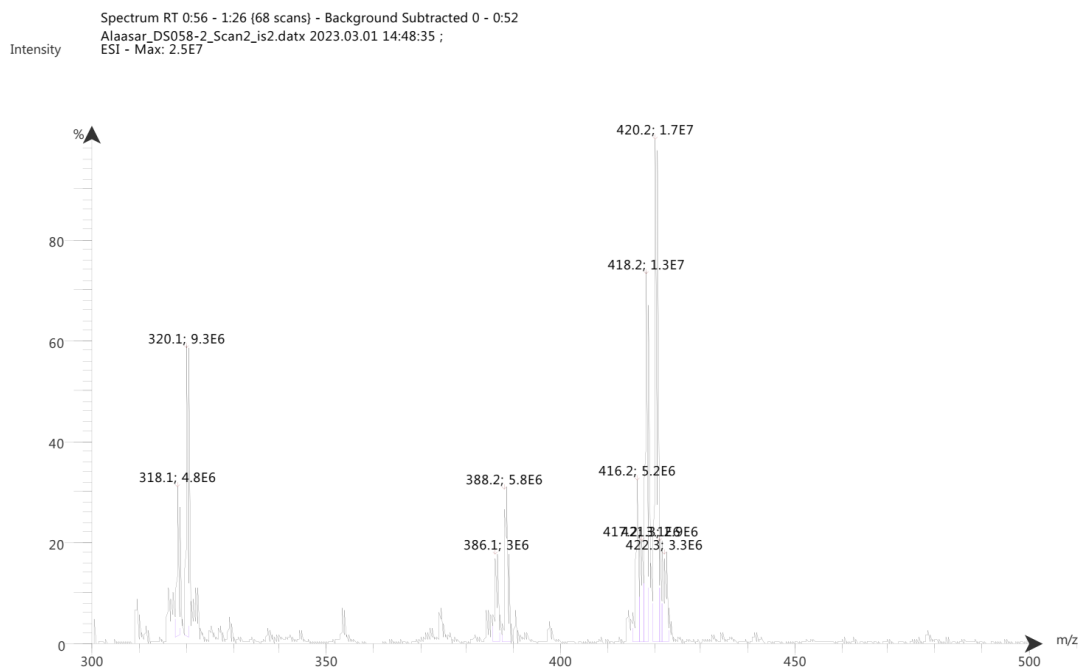

**Figure S46.** MS chart of compound **10**.

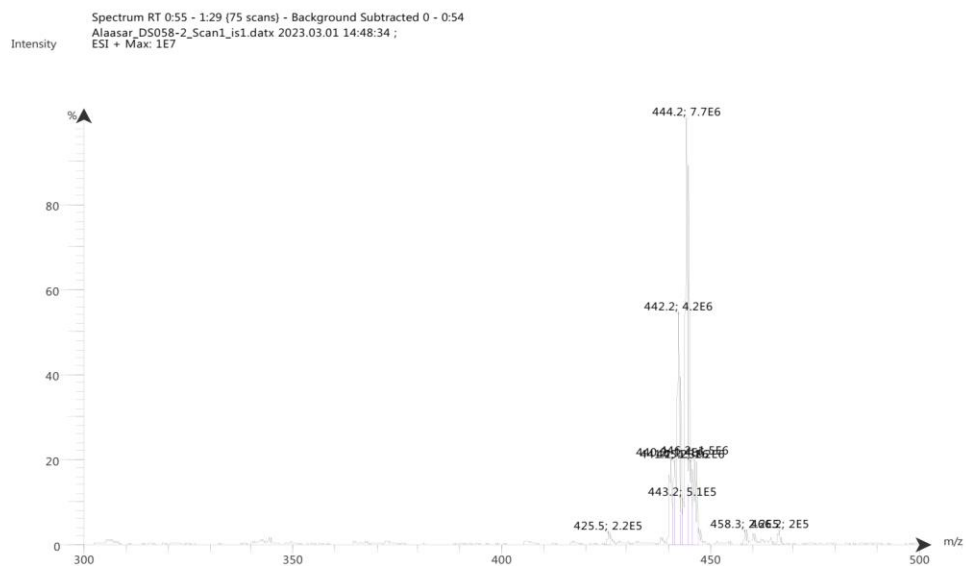

**Figure S47.** MS chart of compound **10**.

## Supporting Information

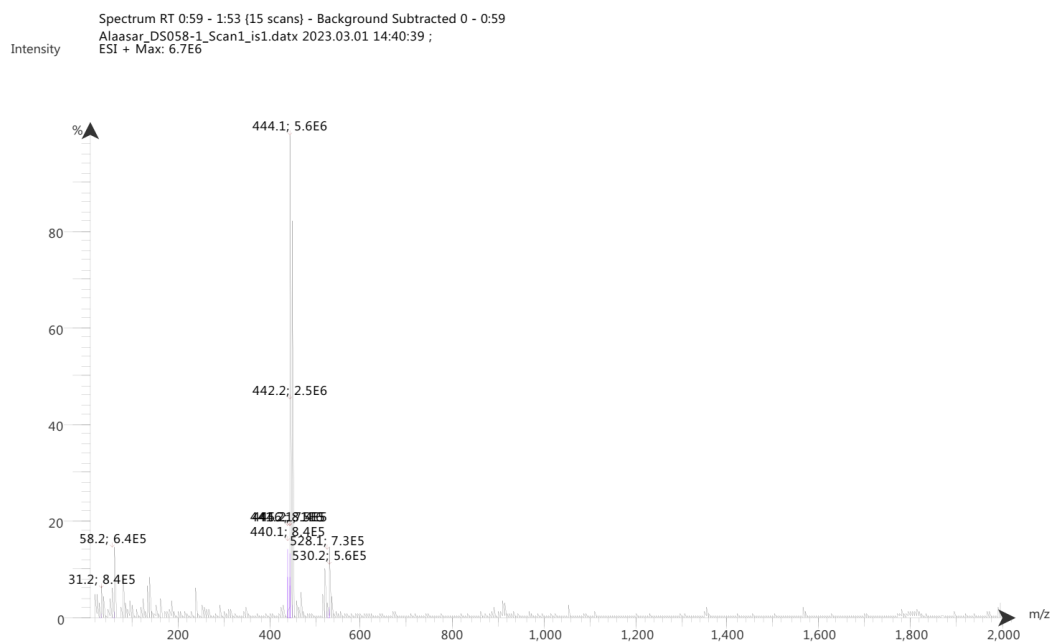

**Figure S48.** MS chart of compound **10**.

## Supporting Information

### 4-((2-(methoxycarbonyl)-4-(methylselanyl)phenyl)amino)-4-oxobut-2-enoic acid (**11**)

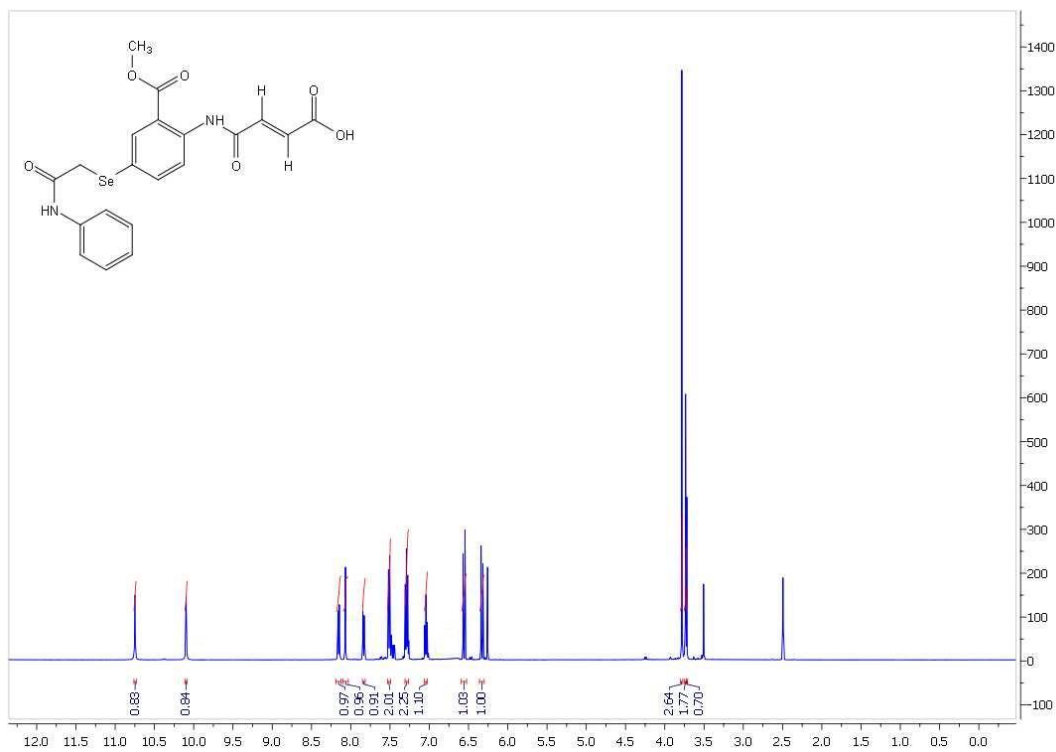

**Figure S49.** <sup>1</sup>H NMR chart of compound **11**.

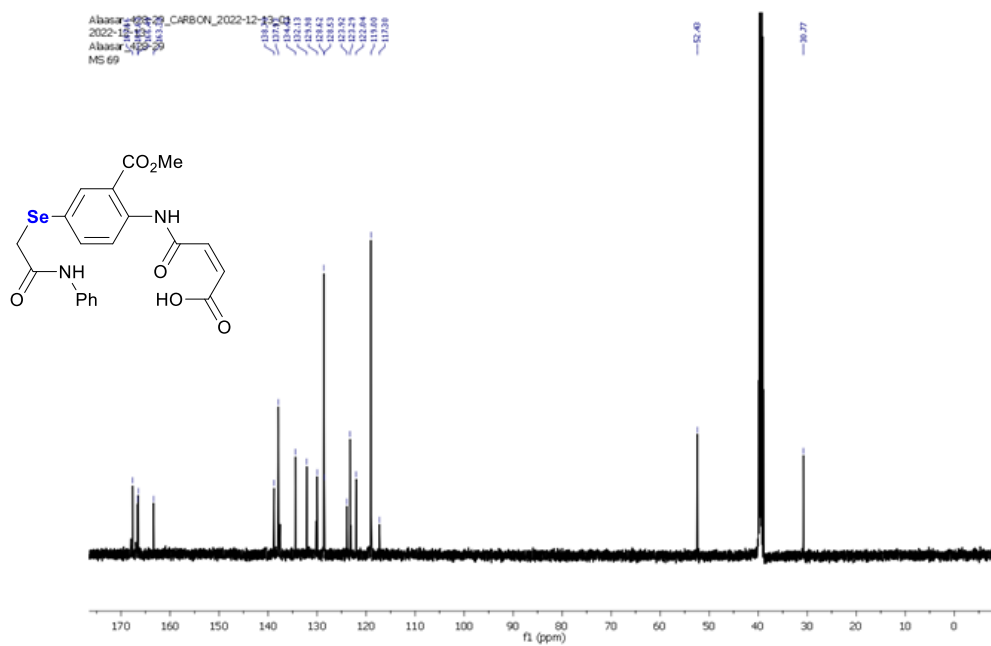

**Figure S50.** <sup>13</sup>C NMR chart of compound **11**.

# Supporting Information

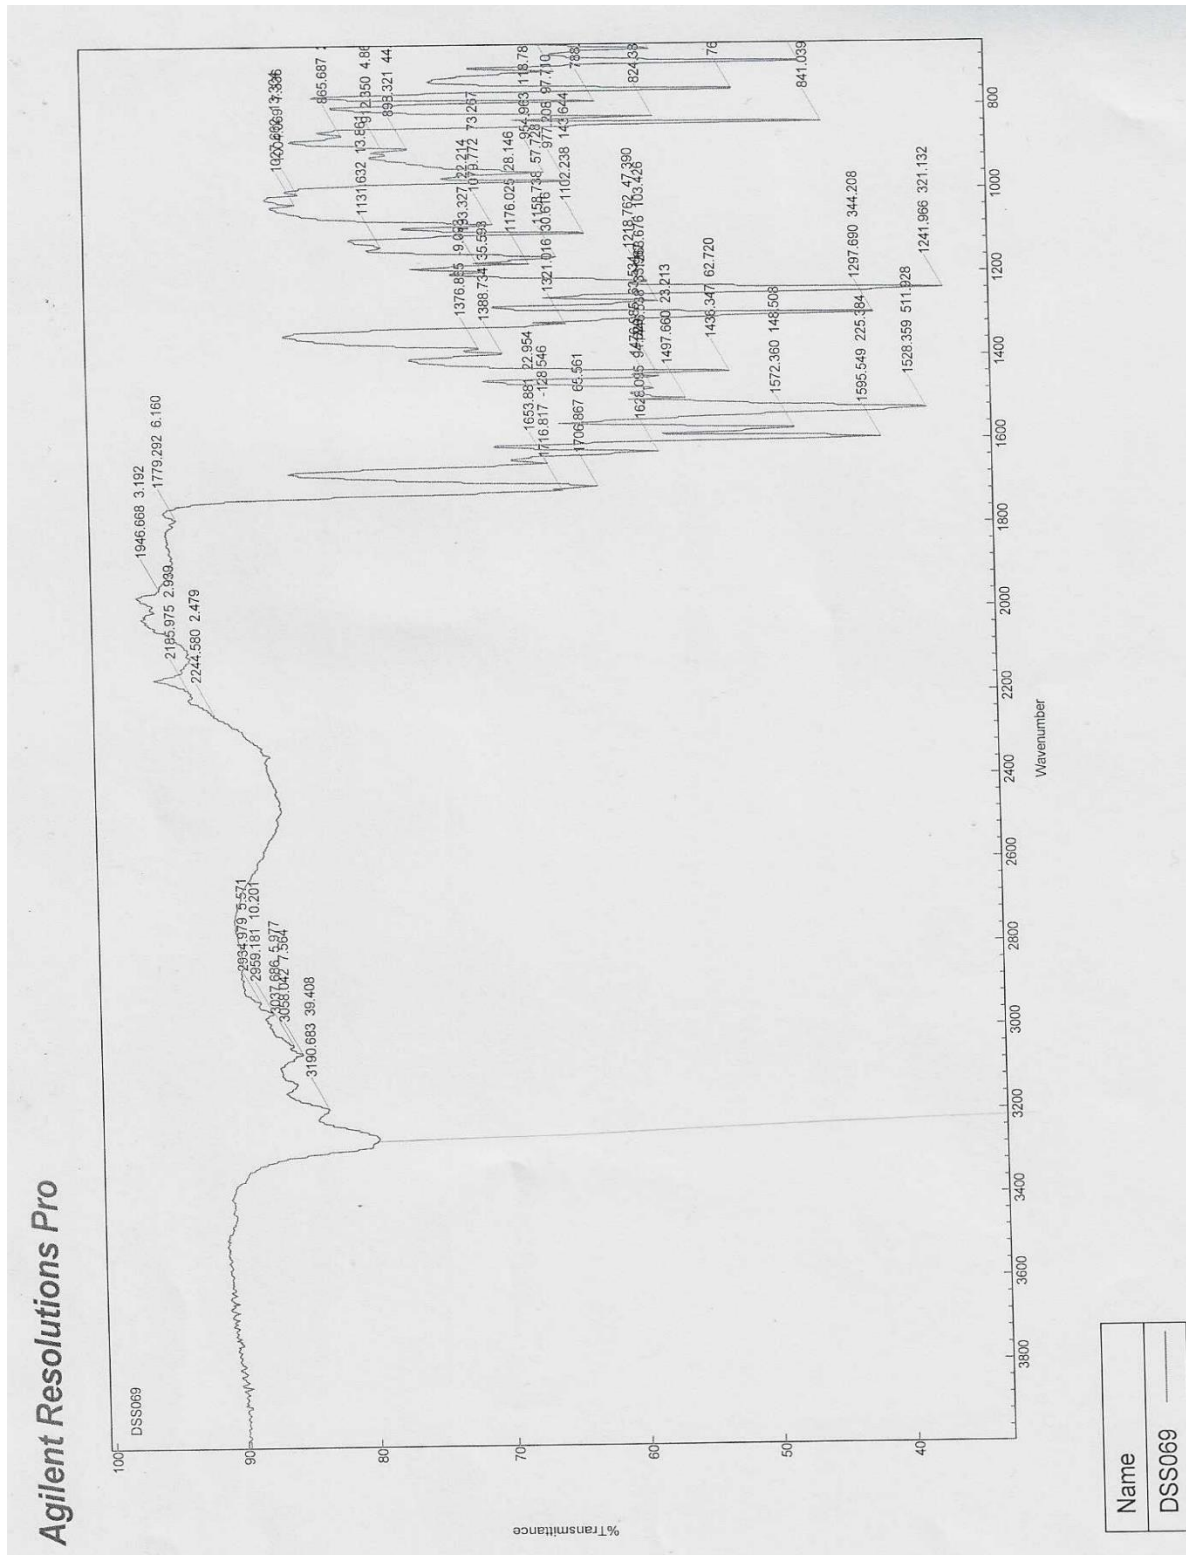

**Figure S51.** IR chart of compound 11.

## Supporting Information

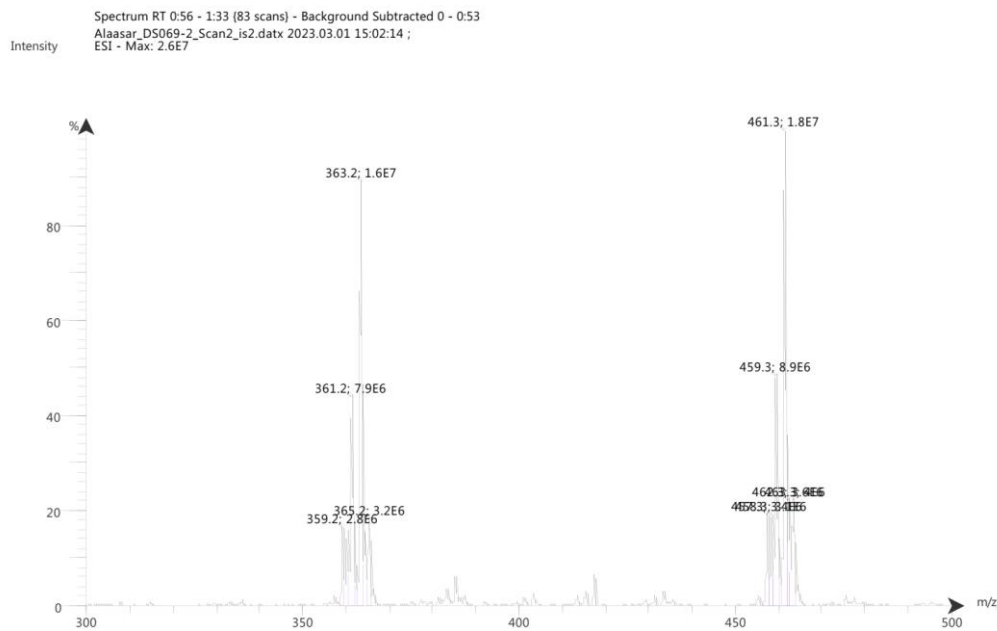

**Figure S52.** MS chart of compound **11**.

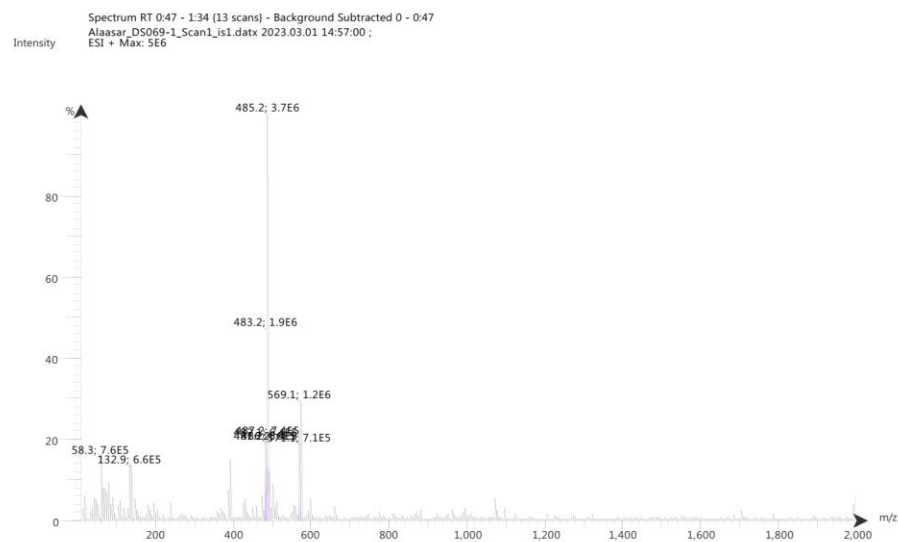

**Figure S53.** MS chart of compound **11**.

## Supporting Information

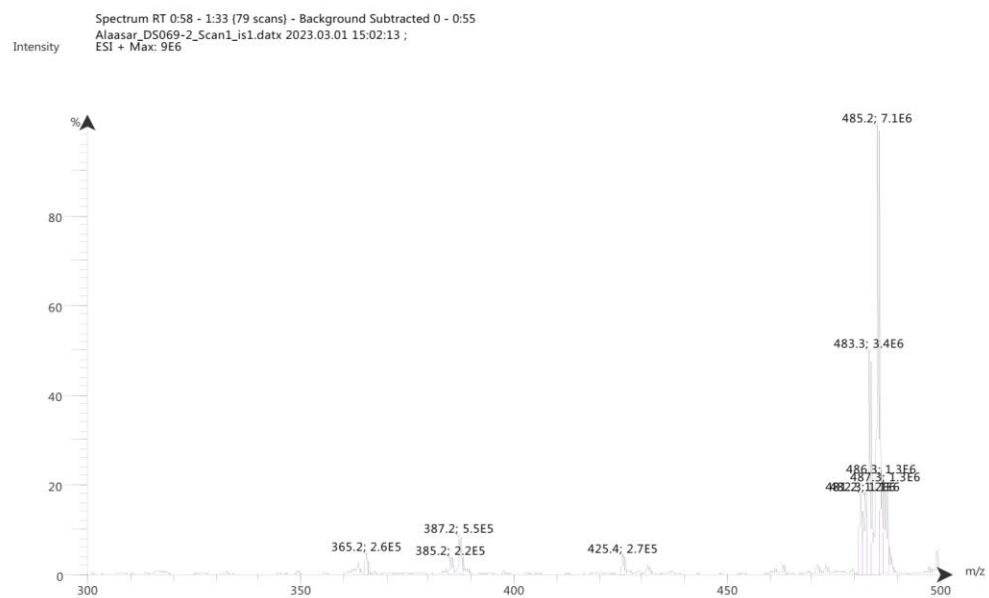

**Figure S54.** MS chart of compound **11**.

## Supporting Information

### 4-((2-(methoxycarbonyl)-4-(methylselanyl)phenyl)amino)-4-oxobut-2-enoic acid (**12**)

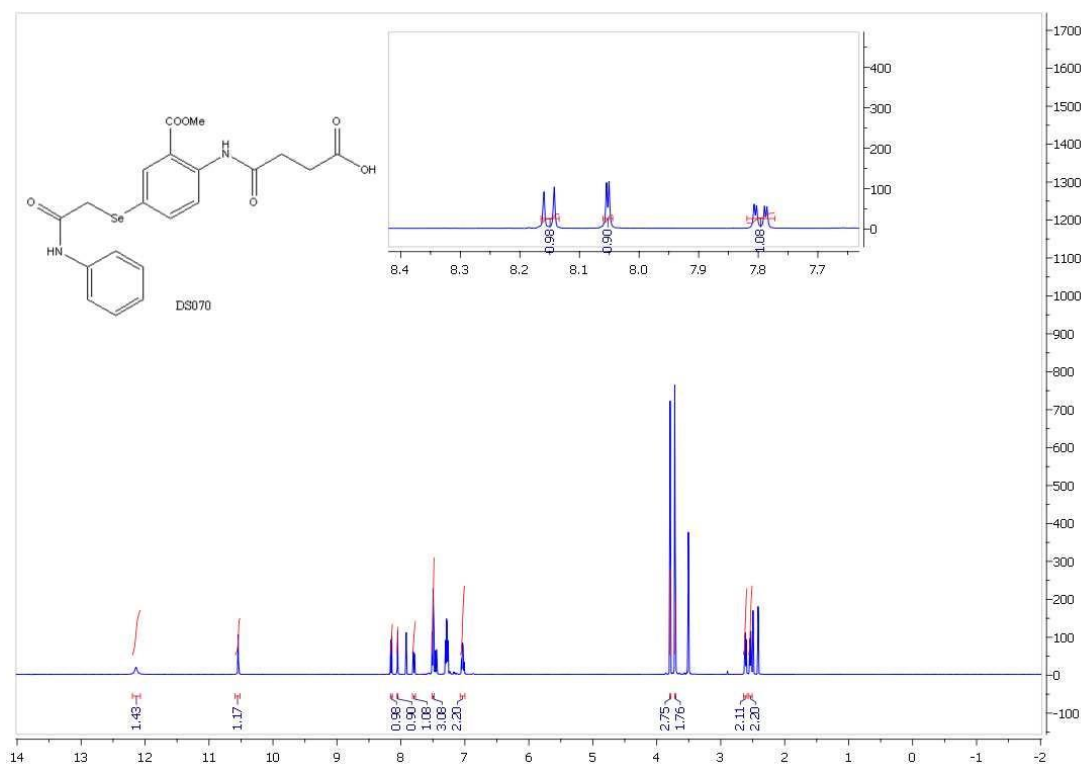

**Figure S55.**  $^1\text{H}$  NMR chart of compound **12**.

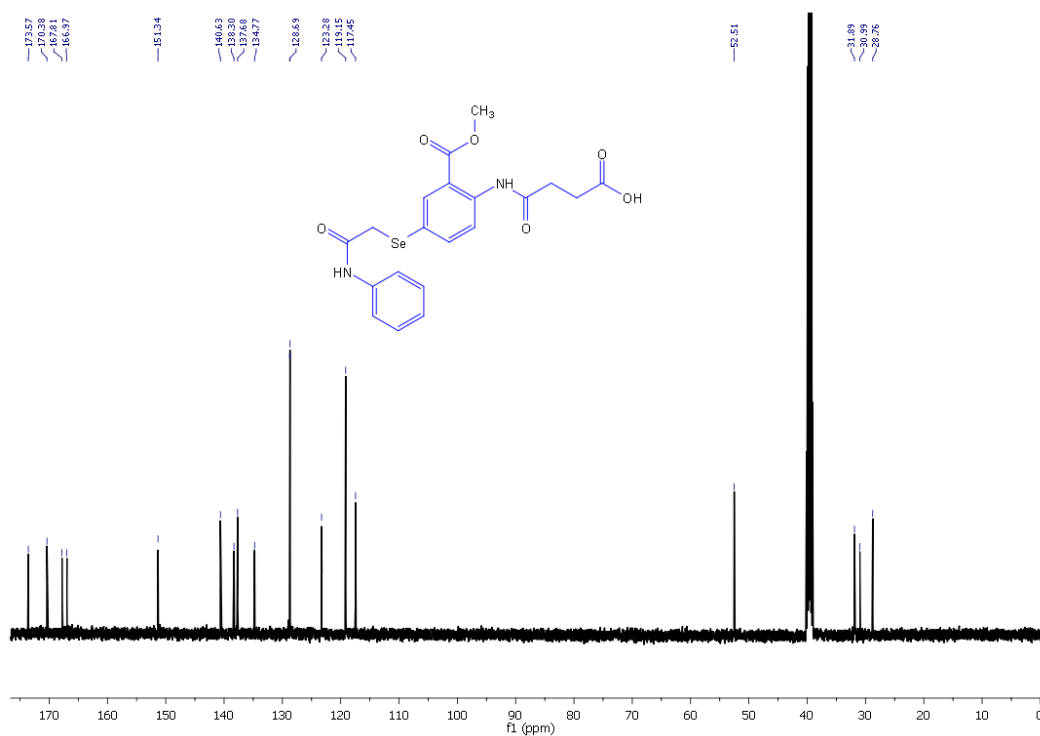

**Figure S56.**  $^{13}\text{C}$  NMR chart of compound **12**.

# Supporting Information

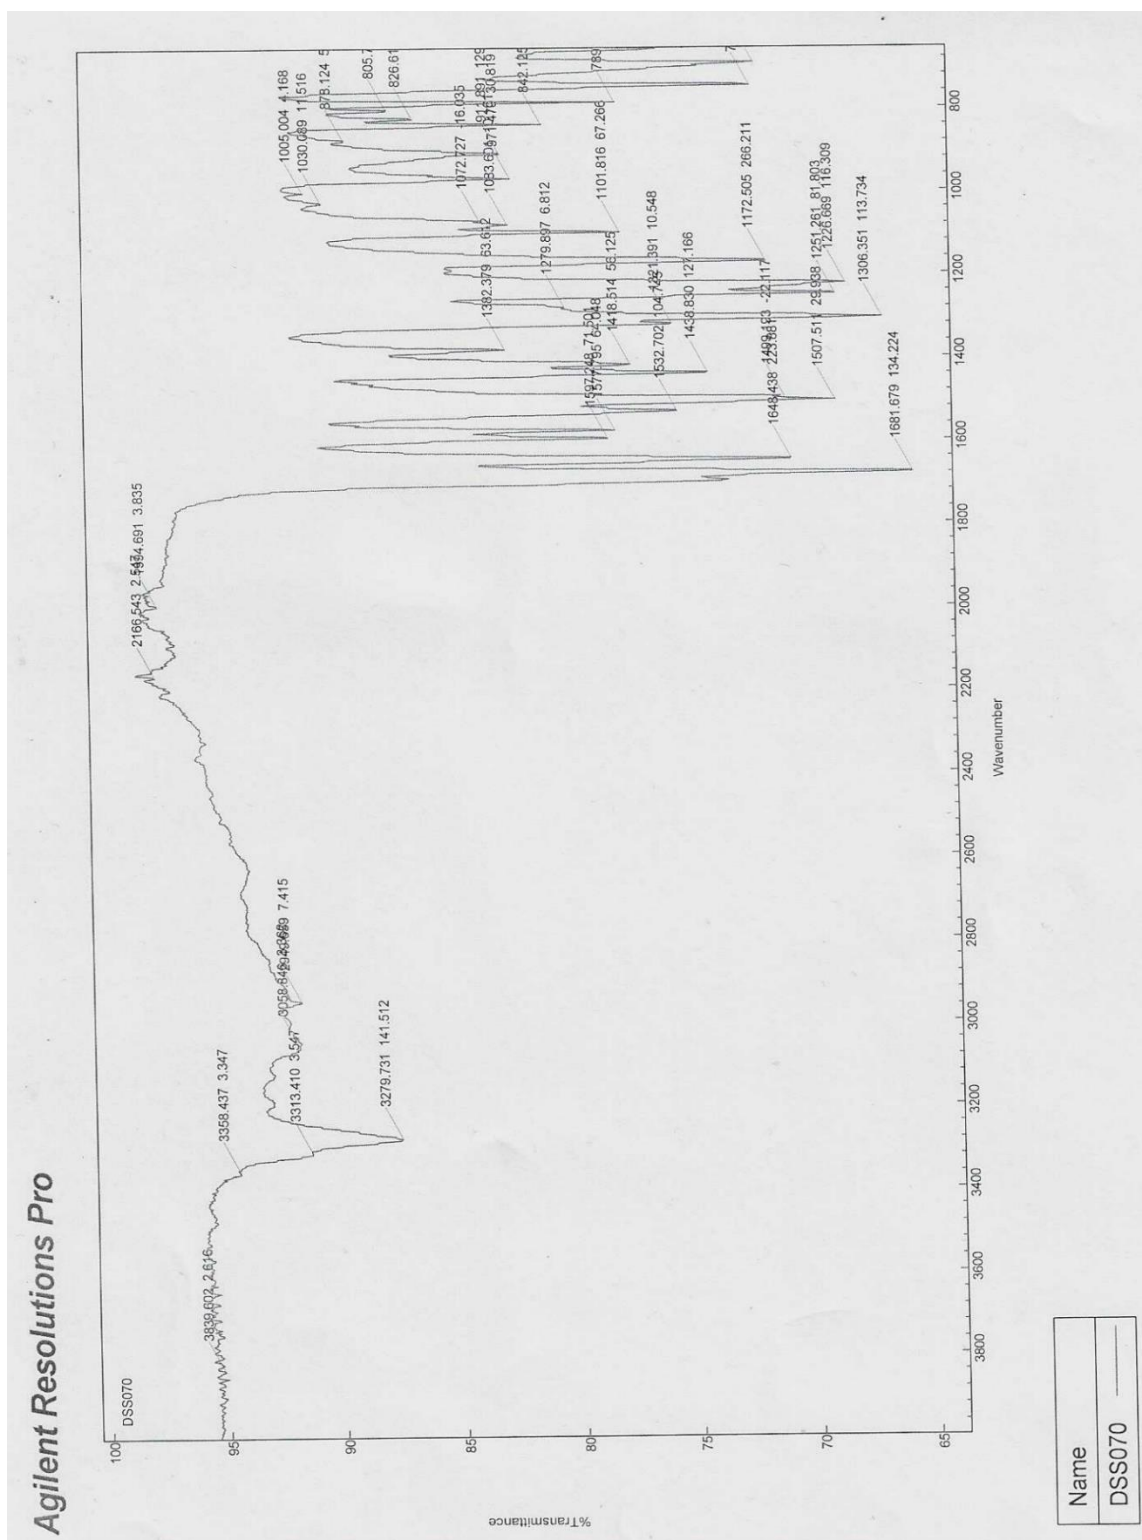

Figure S57. IR chart of compound 12.



## Supporting Information

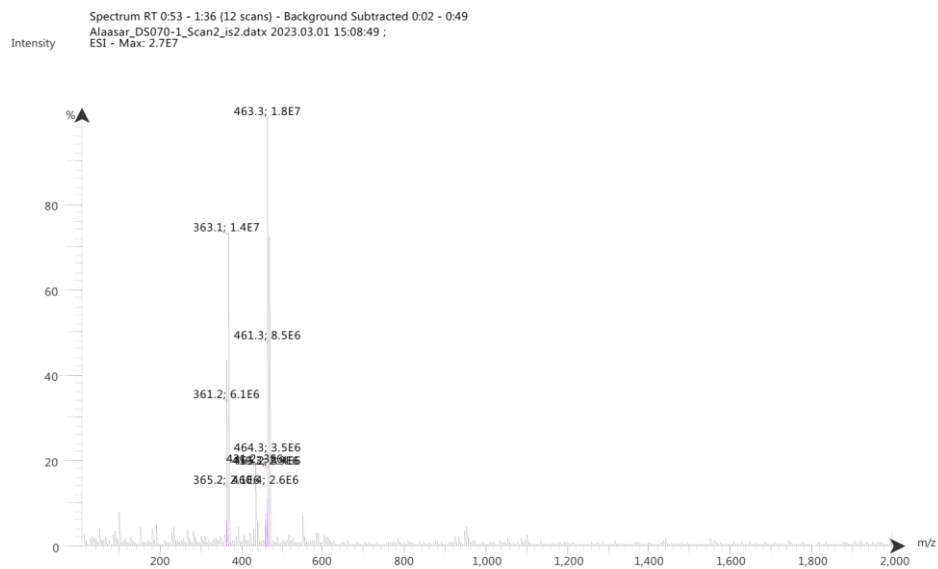

**Figure S58.** MS chart of compound **12**.

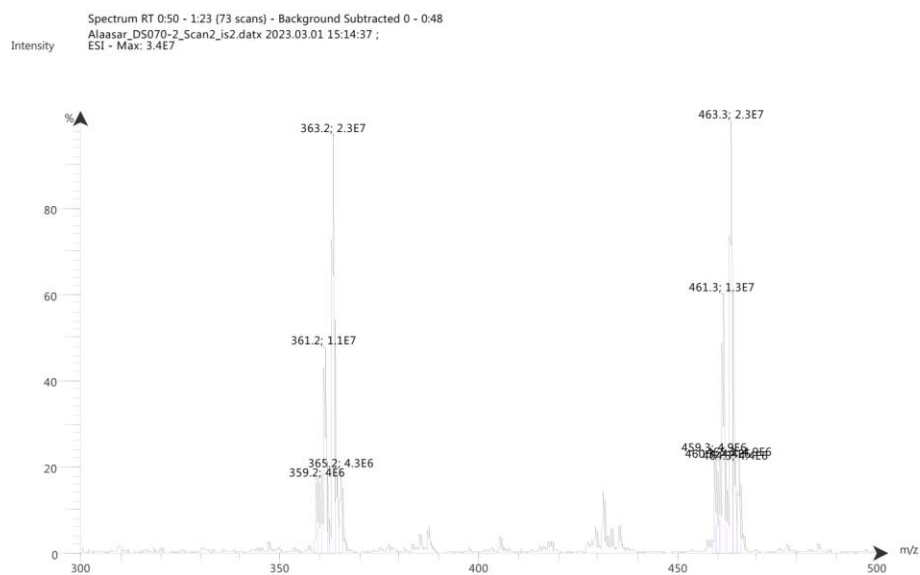

**Figure S59.** MS chart of compound **12**.

## Supporting Information

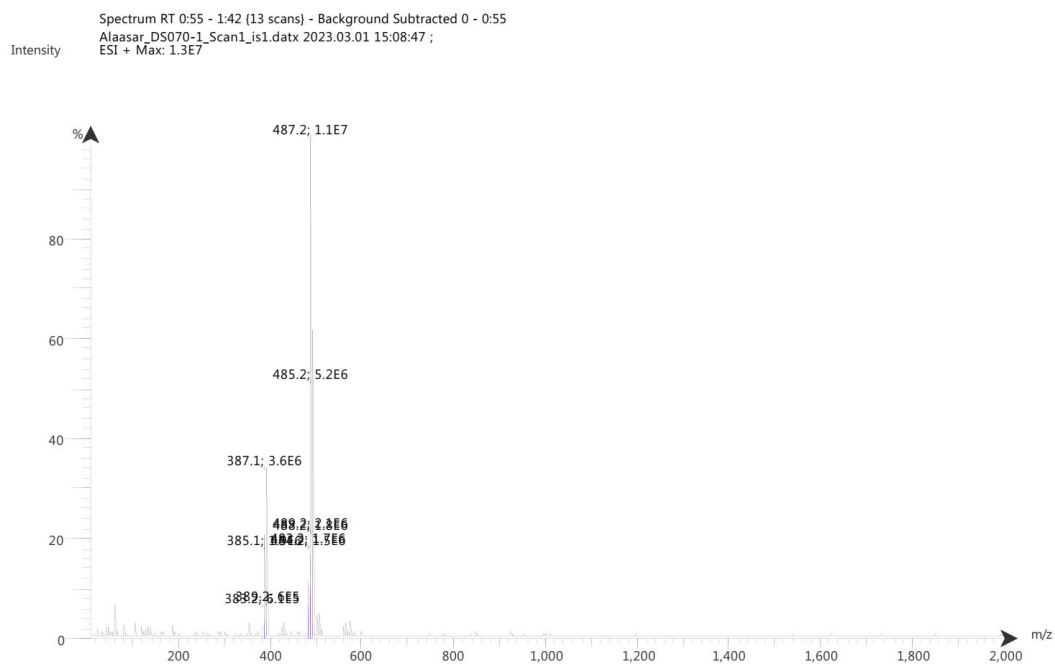

**Figure S60.** MS chart of compound **12**.

## Supporting Information

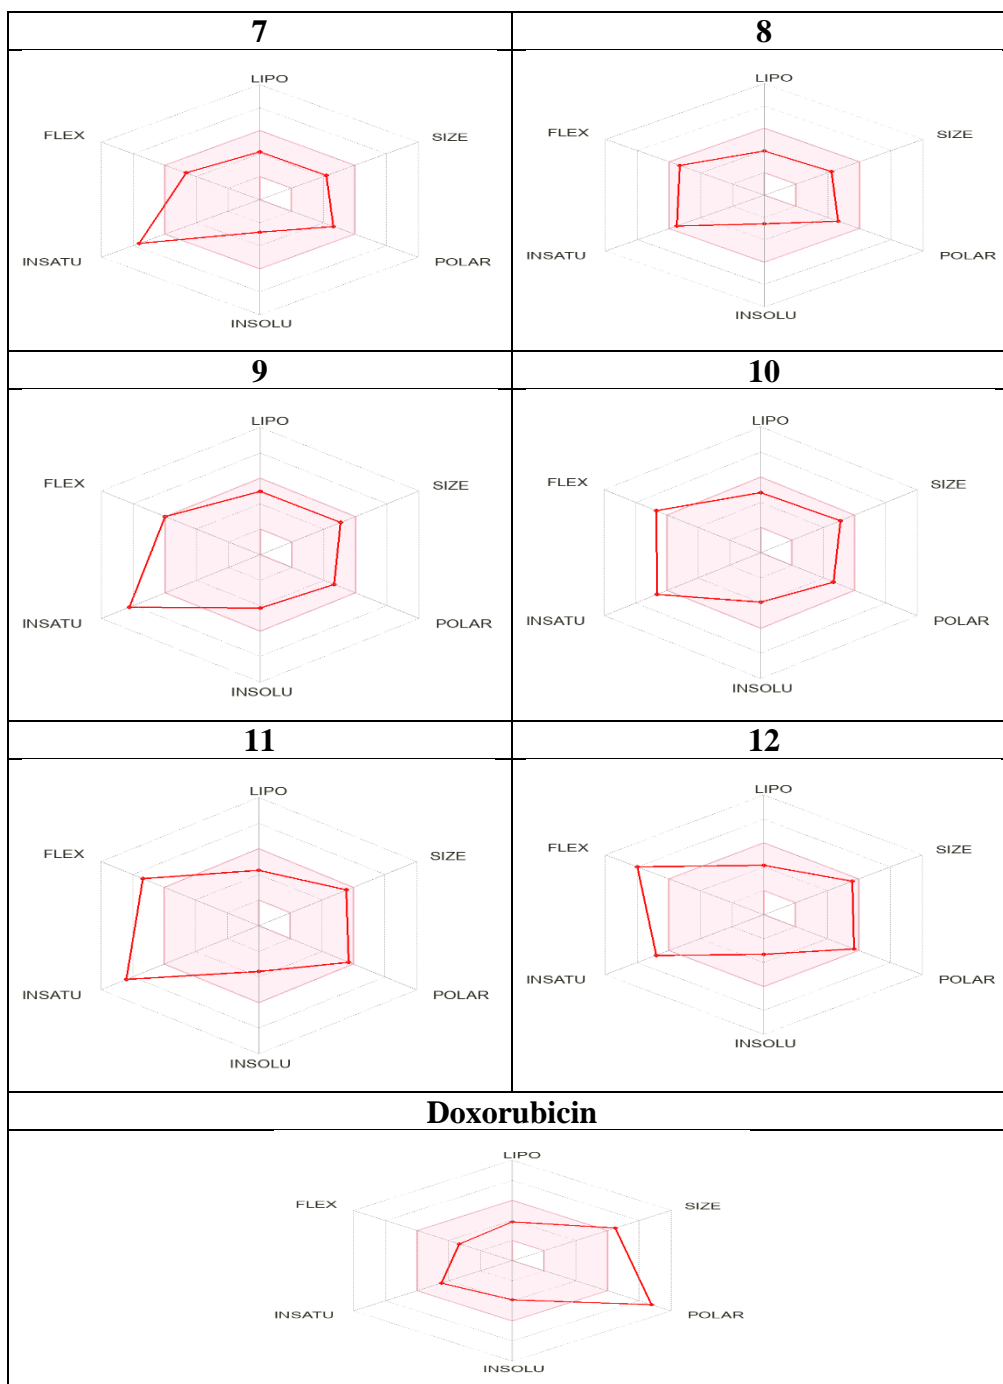

**Figure S61.** Radar bioavailability for studied compounds in which the area in pink displays specific property optimal range. (LIPO = lipophilicity expressed as XLOGP3 (range from -0.7 to 5.0). SIZE= size expressed as molecular weight (range from 150 g/mol to 500 g/mol). POLAR = polarity expressed as TPSA (topological polar surface area) (range from 20 Å<sup>2</sup> to 130 Å<sup>2</sup>). INSOLU = water insolubility by log S (ESOL) (range from -6 to 0). INSATU = insaturation expressed as for each carbons fraction in sp<sup>3</sup> hybridization (range from 0.25 to 1). FLEX = flexibility, expressed as number of rotatable bonds (range from 0 to 9).

## Supporting Information

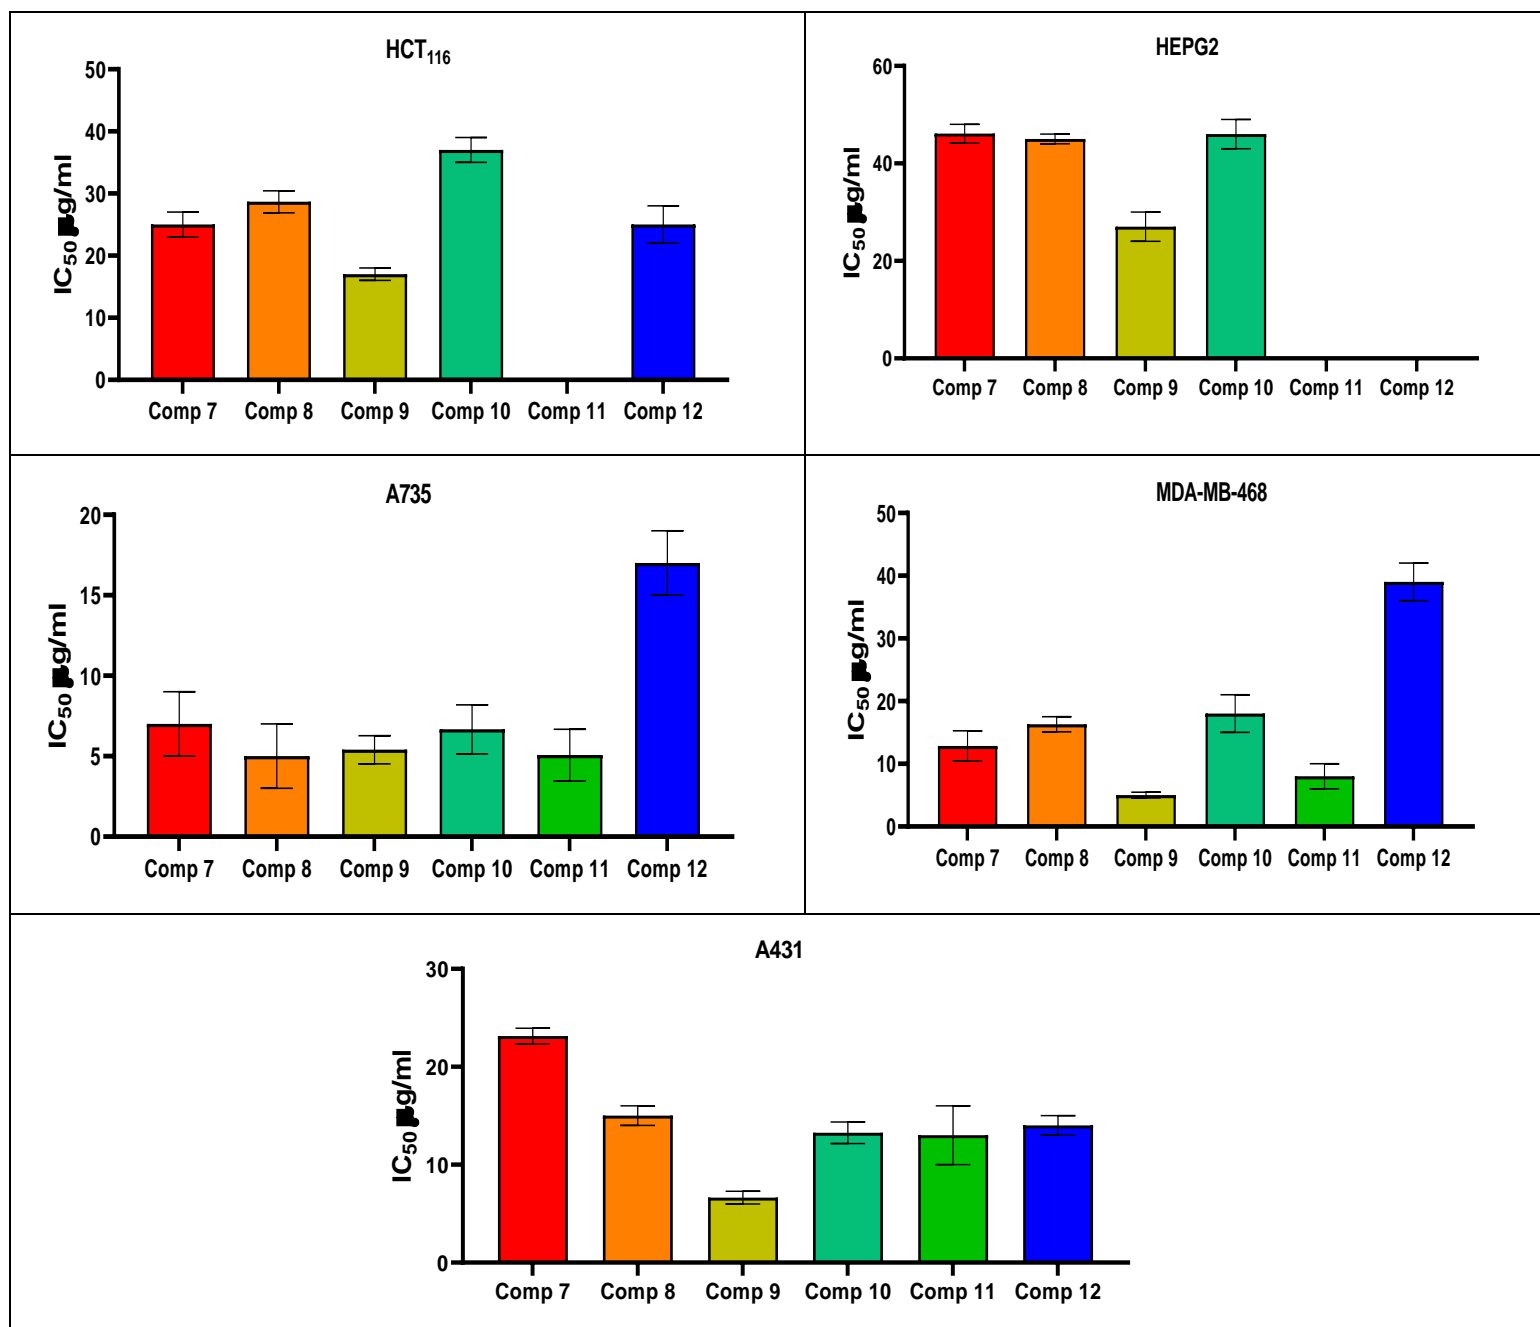

**Figure S62.** Cytotoxic inhibitory concentration 50 ( $IC_{50}$ ) evaluation of the investigated compounds against HCT<sub>116</sub>, HEPG2, A375, MDA-MB-468, and A431 cancer cell lines.

## Supporting Information

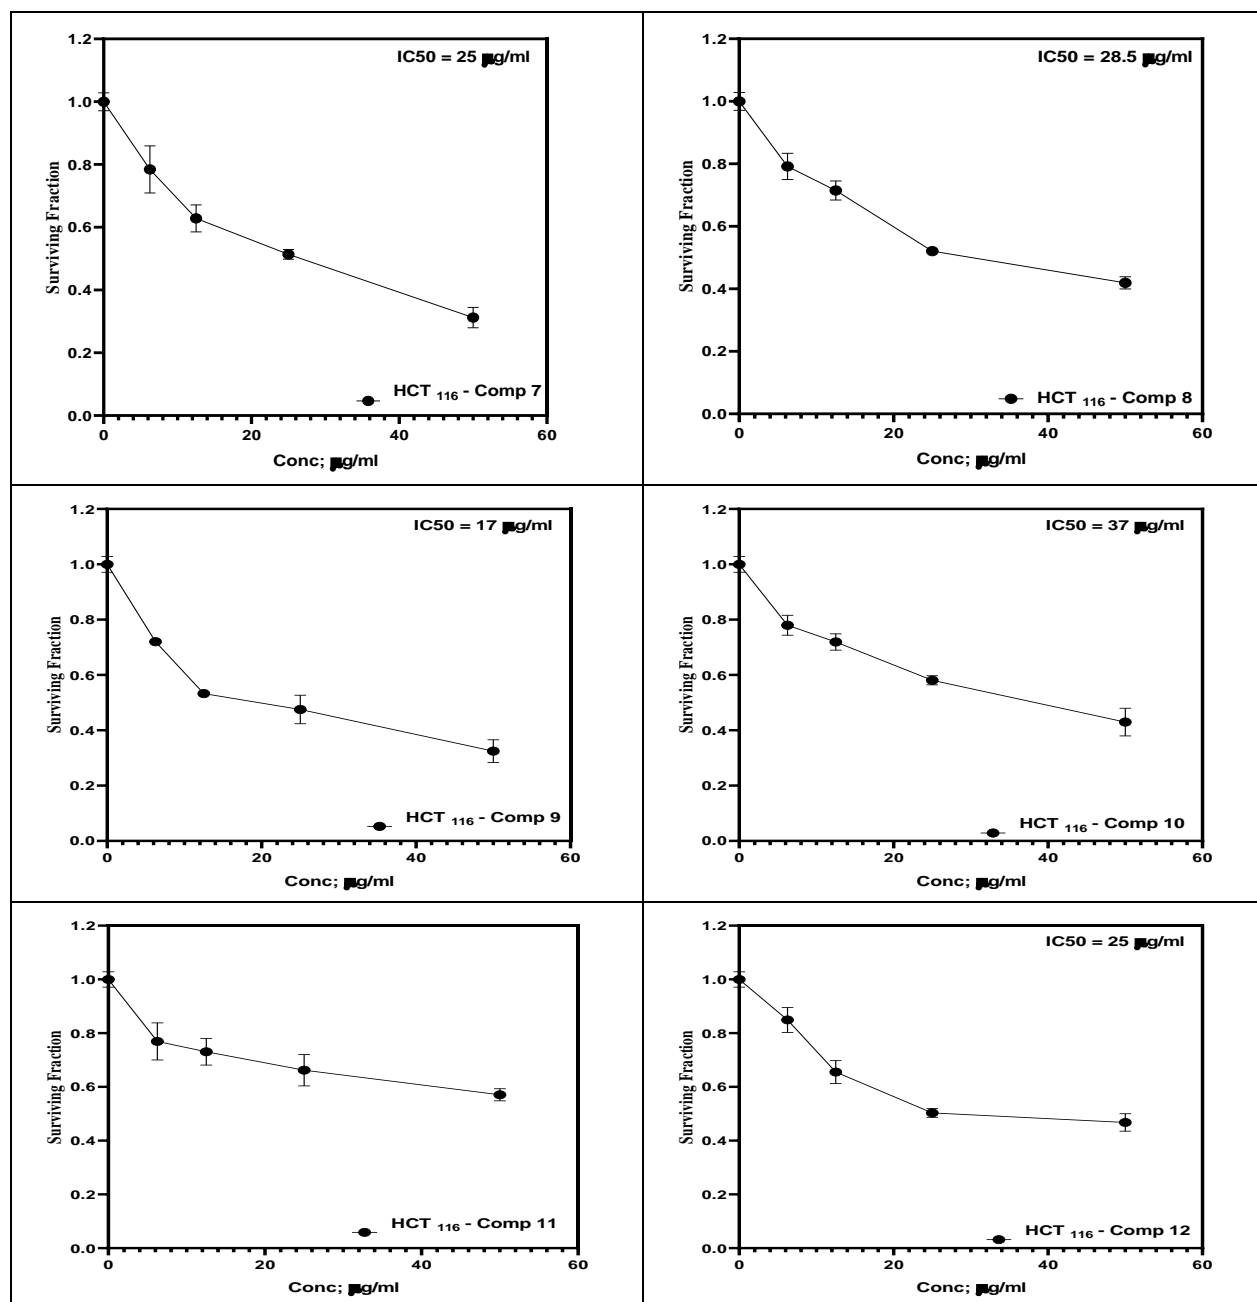

**Figure S63.** Cytotoxic inhibitory concentration 50 (IC<sub>50</sub>) evaluation of the investigated compounds against HCT<sub>116</sub> cancer cell line.

## Supporting Information

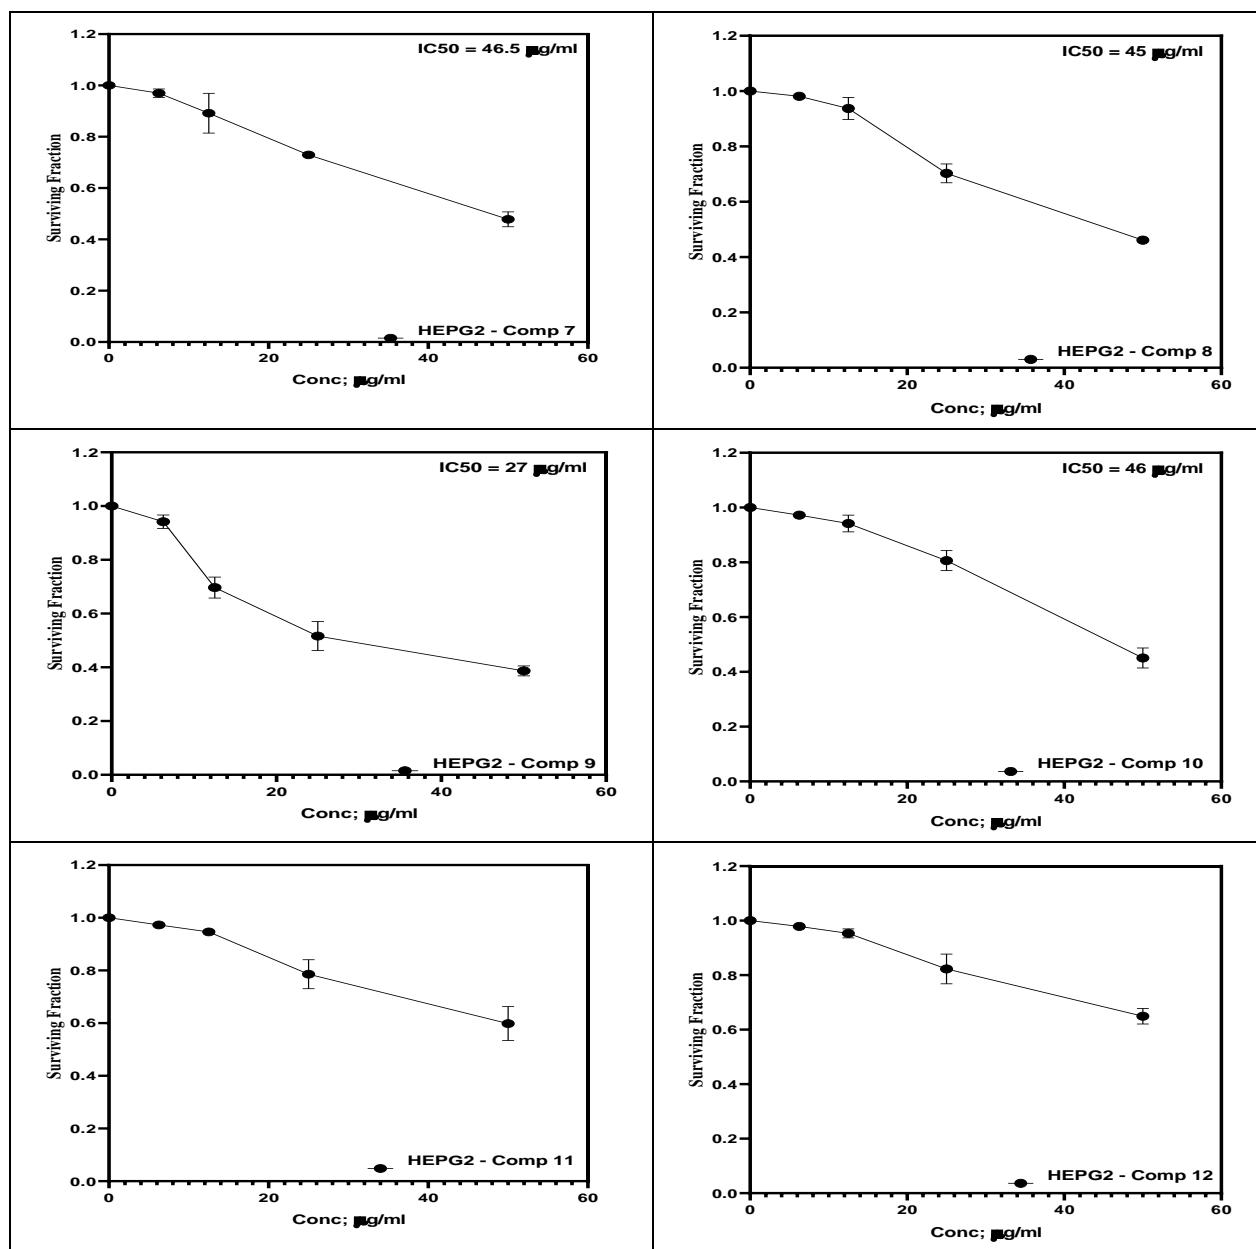

**Figure S64.** Cytotoxic inhibitory concentration 50 (IC<sub>50</sub>) evaluation of the investigated compounds against HEPG2 cancer cell line.

## Supporting Information

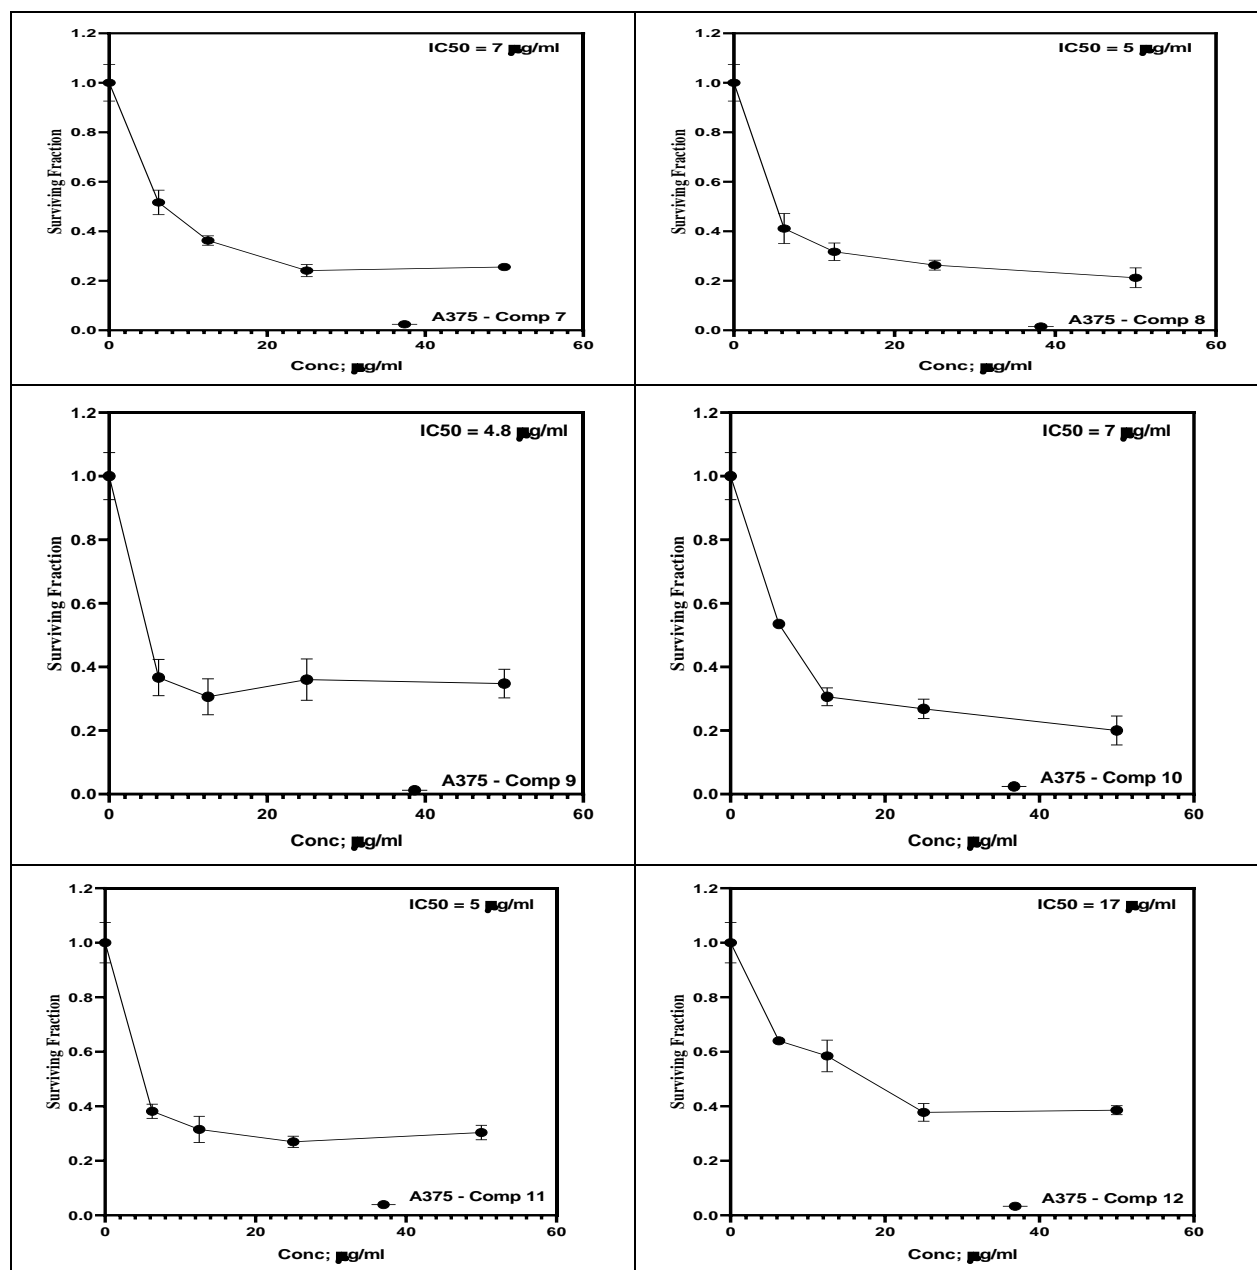

**Figure S65.** Cytotoxic inhibitory concentration 50 (IC<sub>50</sub>) evaluation of the investigated compounds against A375 cancer cell line.

## Supporting Information

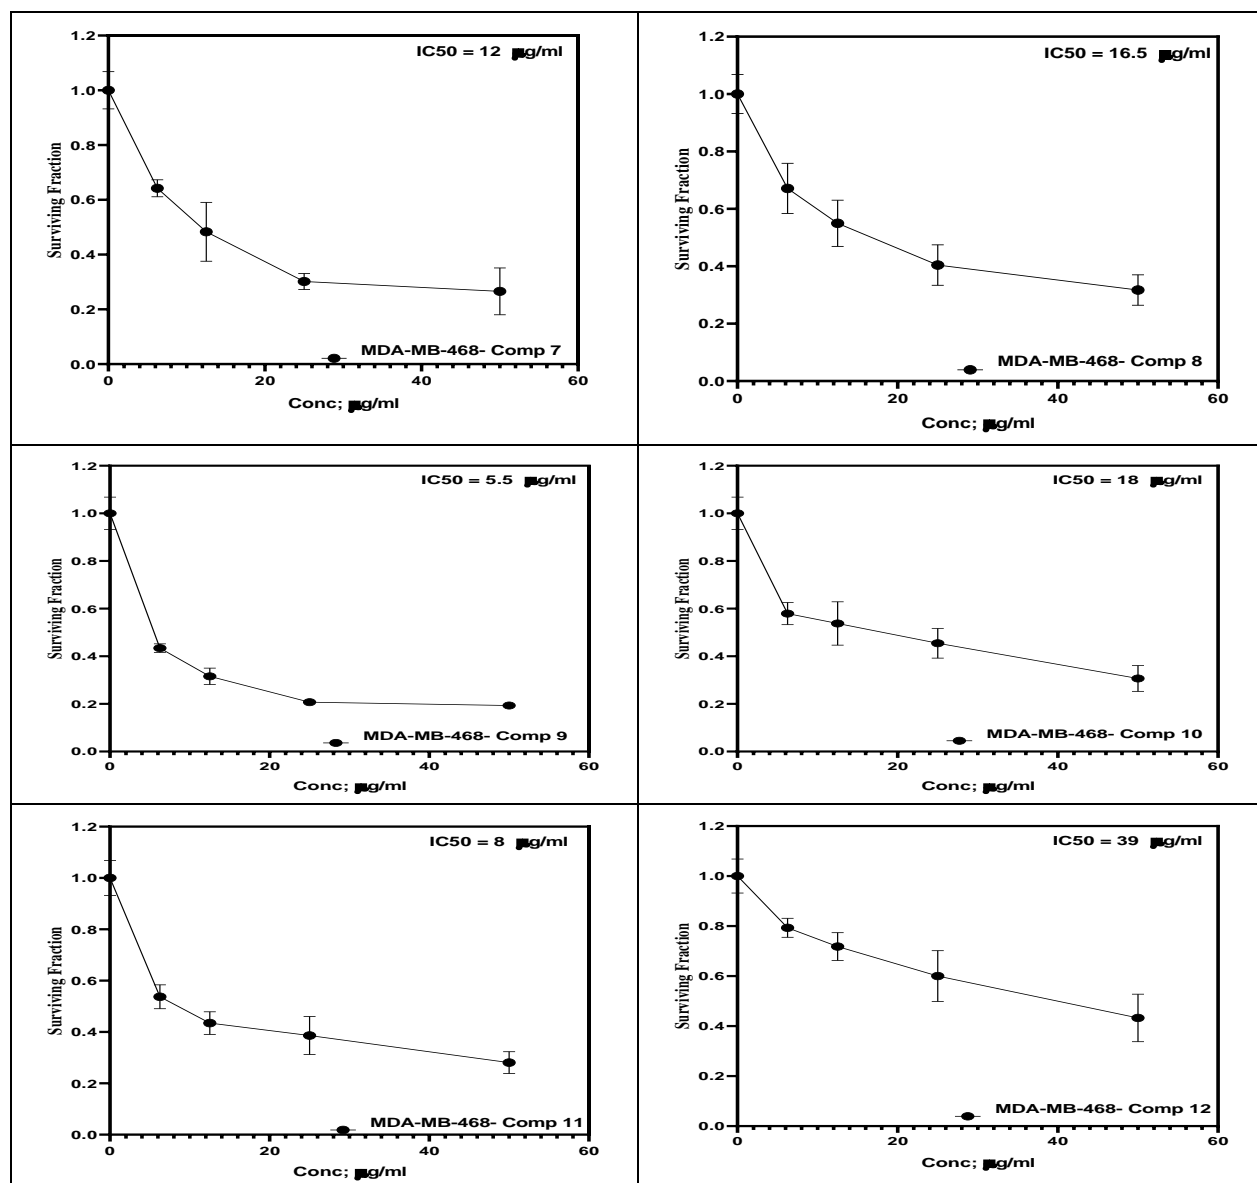

**Figure S66.** Cytotoxic inhibitory concentration 50 (IC<sub>50</sub>) evaluation of the investigated compounds against MDA-MB-468 cancer cell line.



## Supporting Information

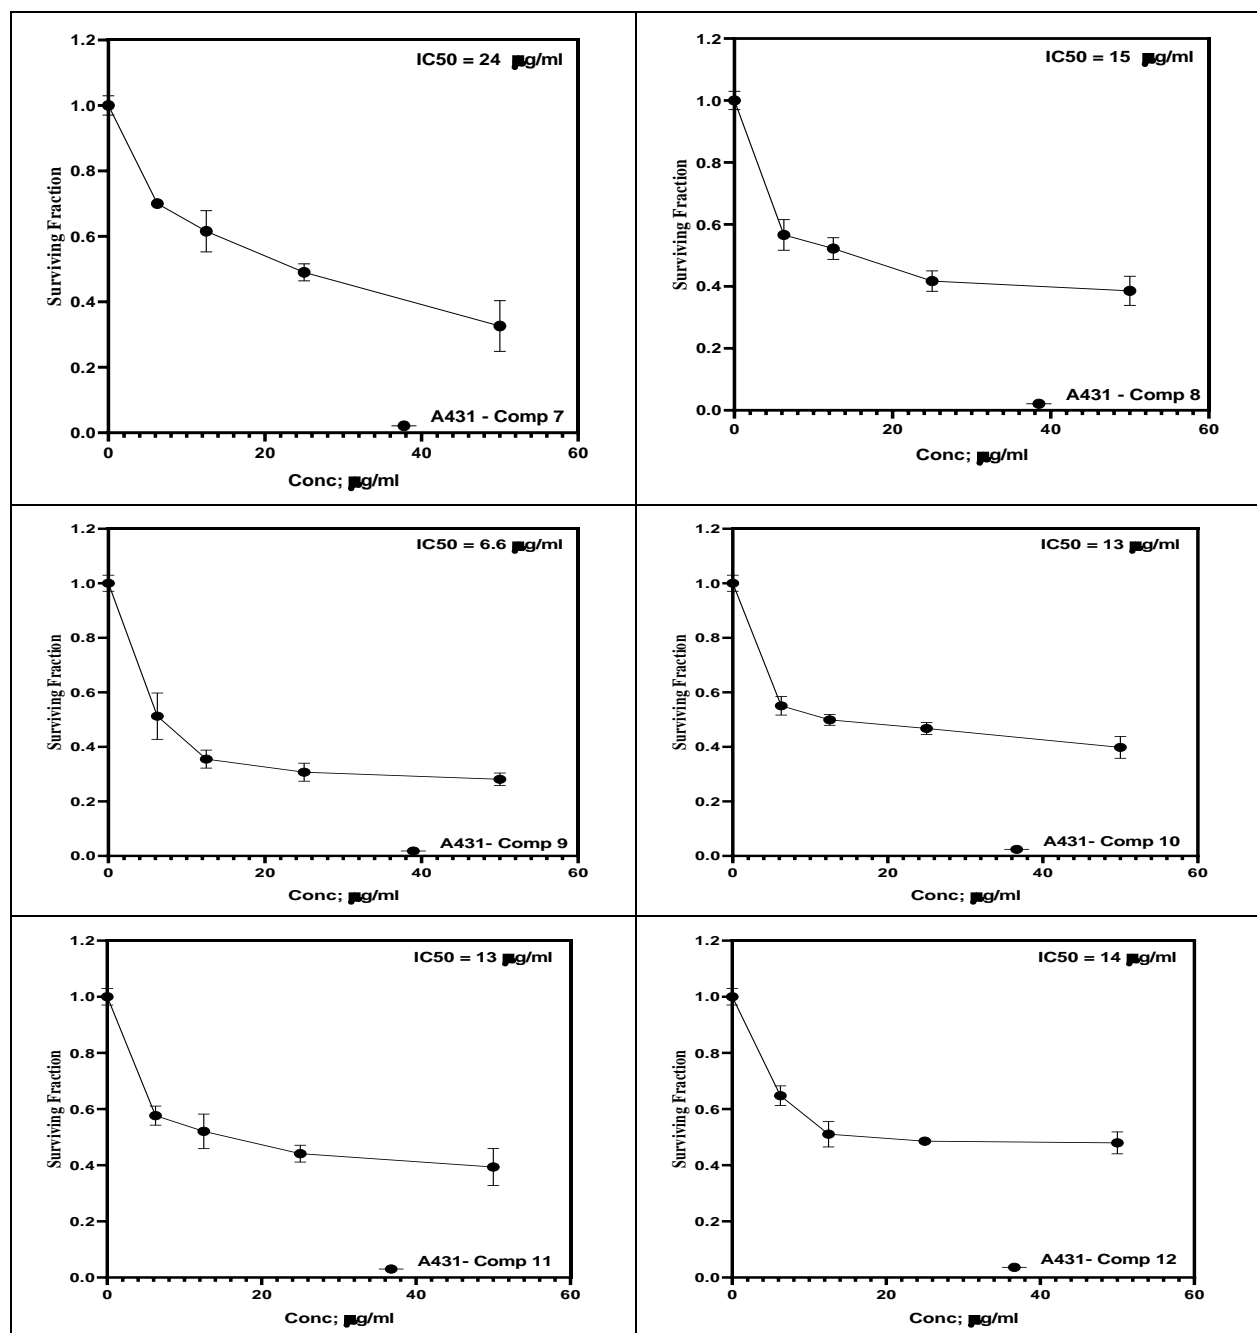

**Figure S67.** Cytotoxic inhibitory concentration 50 (IC<sub>50</sub>) evaluation of the investigated compounds against A431 cancer cell line.

## Supporting Information

### Materials and Methods

#### SI 1. Chemistry

##### SI 1.1. Material and methods

Melting points were recorded in degree centigrade on a Gallenkamp instrument using the standard open capillary method. The IR spectra were recorded on FTIR 5000 Mattson spectrophotometer. The  $^1\text{H}$ - and  $^{13}\text{C}$ -NMR spectra were recorded in  $\text{DMSO}-d_6$  on a Varian 400 and 500 Spectrophotometer ( $^1\text{H}$ : 400 and 500 MHz,  $^{13}\text{C}$ : 101 and 125 MHz) at 295 K. The chemical shifts ( $\delta$ ) are given in parts per million (ppm) downfield relative to tetramethyl silane (TMS). Mass Spectra were recorded on Bruker micrOTOFQ II APPI mass spectrometer. Compounds **2–6** were obtained according to our literature reports<sup>1,2</sup>, and the new compounds **7–12** obtained according to our literature reports<sup>3</sup>.

##### SI 1.2. Synthesis and characterization

###### The synthesis of OSe maleanilic **7, 9, and 11** and succinanilic **8, 10, and 12** derivatives

Maleic or succinic anhydride (1.3 mmol) was added to OSe amine (1.0 mmol) in methylbenzene (3.0 mL). The solution was stirred for 8 hrs. Then, the formed precipitate was filtered and washed with warm methylbenzene and water. The acids were obtained in enough purity, and no further purifications were needed.

###### Synthesis of methyl 2-amino-5-selenocyanatobenzoate (**2**)<sup>1,4</sup>

Methyl 2-amino-5-selenocyanatobenzoate (**2**) was synthesized from methyl 2-aminobenzoate (12.5 mmol, 1.80 g) with triselenium dicyanide prepared *in situ* from malononitrile (15 mmol, 1.00 g) and selenium dioxide (30 mmol, 3.30 g). It was isolated as reddish solid; yield: 3.07 g (96%); m.p. = 118–119 °C; R<sub>f</sub> = 0.4 (petroleum ether / ethyl acetate 4:2, v/v). IR (KBr):  $\nu$  3475 (N-H), 3366 (N-H), 2946 (C<sub>aliph</sub>-H), 2842 (C<sub>aliph</sub>-H), 2148 (CN), 1691 (C=O), 1551 (C=C), 1253 (C<sub>Ar</sub>-N), 1085 (C-O), 910, 815 (C-H bending), 556 (C-Se), 536 (C-H rocking), 460;  $^1\text{H}$  NMR (400 MHz,  $\text{DMSO}-d_6$ )  $\delta$  8.02 (s, 1H, Ar-H), 7.57 (d,  $J$  = 8.8 Hz, 1H, Ar-H), 7.08 (s, br, 2H, NH<sub>2</sub>), 6.84 (d,  $J$  = 8.8 Hz, 1H, Ar-H), 3.82 (s, 3H, OCH<sub>3</sub>).  $^{13}\text{C}$  NMR (101 MHz,  $\text{DMSO}-d_6$ )  $\delta$  166.73, 152.22, 140.09, 137.94, 118.28, 109.59, 105.54, 105.47, 51.73. MS (EI, 70 eV) m/z (%) = 259.35 (M+3H, 2.39), 117 (29.02), 87 (26.6), 75 (2.70), 59 (100.0, base peak).

## Supporting Information

### Synthesis of dimethyl 5,5'-diselanediyylbis(2-aminobenzoate) (**3**)<sup>1,4</sup>

Compound dimethyl 5,5'-diselanediyylbis(2-aminobenzoate) (**3**) was synthesized from methyl 2-amino-5-selenocyanatobenzoate (4 mmol, 1.00 g) and sodium hydroxide (4 mmol, 1.60 g) in anhydrous ethanol (20 mL). Dimethyl 5,5'-diselanediyylbis(2-aminobenzoate) (**3**) appeared as a single compound on TLC and was isolated as a yellow solid; yield: 1.69 g (92%); m.p. = 138–139 °C; R<sub>f</sub> = 0.5 (petroleum ether / ethyl acetate 4:3, v/v). IR (KBr):  $\nu$  3455 (N-H), 3344 (N-H), 2931 (C<sub>aliph</sub>-H), 2890 (C<sub>aliph</sub>-H), 2168 (CN), 1684 (C=O), 1560 (C=C), 1603, 1238 (C<sub>Ar</sub>-N), 1079 (C–O), 811, 784 (C-H bending), 699 (C-H rocking), 533 (C-Se); <sup>1</sup>H NMR (400 MHz, DMSO- d<sub>6</sub>)  $\delta$  7.70 (s, 2H, Ar-H), 7.44 (d, J = 8.6 Hz, 2H, Ar-H), 7.00 (s, 4H, 2NH<sub>2</sub>), 6.77 (d, J = 8.6 Hz, 2H, Ar-H), 3.74 (s, 6H, 2OCH<sub>3</sub>). <sup>13</sup>C NMR (101 MHz, DMSO- d<sub>6</sub>)  $\delta$  167.00, 151.91, 140.57, 138.13, 117.63, 113.57, 108.98, 51.52. MS (EI, 70 ev) m/z (%) = 460.15 (M+H, 20.76), 459.15 (M, 5.20) or 230 (24.42), 119 (9.45), 91 (100.0, base peak), 65 (8.88).

### Synthesis of methyl 2-amino-5-(methylselanyl) benzoate (**4**)<sup>1,4</sup>

Compound **4** was synthesized from dimethyl 5,5'-diselanediyylbis (2-aminobenzoate) (**3**) (2 mmol, 916 mg) and methyl iodide (4.4 mmol, 0.27 mL). It was isolated as brown oil; yield: 402 mg (82%); R<sub>f</sub> = 0.6 (petroleum ether / ethyl acetate 4:2, v/v). IR (KBr):  $\nu$  3474 (N-H), 3364 (N-H), 2948 (C<sub>aliph</sub>-H), 2926 (C<sub>aliph</sub>-H), 1686 (C=O), 1607, 1292 (C<sub>Ar</sub>-N), 1110 (C–O), 815, 789, 696 (C-H bending), 559 (C-Se); <sup>1</sup>H NMR (400 MHz, DMSO- d<sub>6</sub>)  $\delta$  7.82 (s, 1H, Ar-H), 7.40 (d, J = 8.6 Hz, 1H, Ar-H), 6.77 (d, J = 8.6 Hz, 1H, Ar-H), 6.75 (s, 2H, NH<sub>2</sub>), 3.62 (s, 3H, OCH<sub>3</sub>), 2.22 (s, 3H, CH<sub>3</sub>). <sup>13</sup>C NMR (101 MHz, DMSO- d<sub>6</sub>)  $\delta$  167.70, 151.00, 138.90, 135.03, 118.21, 113.98, 109.87, 51.98, 9.17. MS (EI, 70 ev) m/z (%) = 245.10 (M, 100.0, base peak), 230 (38.06), 186 (10.46), 170 (35.08), 91 (91.10).

### Synthesis of methyl 2-amino-5-(benzylselanyl) benzoate (**5**)<sup>1,4</sup>

Compound **5** was synthesized from dimethyl 5,5'-diselanediyylbis(2-aminobenzoate) (**3**) (2 mmol, 916 mg) and benzyl chloride (4.4 mmol, 0.50 mL). It was isolated as light brown solid; yield: 597 mg (93%); m.p. = 78 °C; R<sub>f</sub> = 0.6 (petroleum ether / ethyl acetate 4:3, v/v). IR (KBr):  $\nu$  3462 (N-H), 3353 (N-H), 2977 (C<sub>aliph</sub>-H), 2946 (C<sub>aliph</sub>-H), 1672 (C=O), 1621, 1436, 1234 (C<sub>Ar</sub>-N), 1114 (C-O), 810 (C-H bending), 692 (C-H rocking), 595 (C-Se); <sup>1</sup>H NMR (400 MHz, DMSO- d<sub>6</sub>)  $\delta$  7.70 (s, 1H, Ar-H), 7.30 (d, J = 8.6 Hz, 1H, Ar-H), 7.23 (dd, J = 8.6 Hz, J = 2.1 Hz, 2H, Ar-H),

## Supporting Information

7.19 (d,  $J = 8.7$  Hz, 2H, Ar-H), 7.14 (d,  $J = 8.6$  Hz, 2H, Ar-H), 6.82 (s, 2H, NH<sub>2</sub>), 4.00 (s, 2H, SeCH<sub>2</sub>), 3.77 (s, 3H, OCH<sub>3</sub>); <sup>13</sup>C NMR (101 MHz, DMSO- d<sub>6</sub>)  $\delta$  167.69, 151.53, 141.06, 139.66, 137.95, 129.24, 128.65, 126.98, 117.87, 112.42, 109.68, 51.94, 32.75. MS (EI, 70 eV)  $m/z$  (%) = 321.20 (M, 46.87), 244.10 (2.77), 230 (34.88), 150.15 (1.02), 91.05 (100.0, base peak).

### Synthesis of methyl 2-amino-5-((2-oxo-2-(phenylamino) ethyl) selenyl) benzoate (**6**)<sup>1, 4</sup>

Compound **6** was synthesized from dimethyl 5,5'-diselanyldibis (2-aminobenzoate) (**3**) (2.0 mmol, 916 mg) and 2-chloro-N-phenylacetamide (4.4 mmol, 744 mg). It was isolated as violet solid; yield: 699 mg (96%); m.p. = 126–128 °C; R<sub>f</sub> = 0.50 (petroleum ether / ethyl acetate 4:2, v/v). IR (KBr):  $\nu$  3466 (N-H), 3354 (N-H), 3246 (N-H), 2945 (C<sub>aliph</sub>-H), 1678, 1594 (C=O), 1542 (C=C), 1439, 1238 (C<sub>Ar</sub>-N), 1090 (C-O), 752 (C-H bending), 695, 552 (C-Se), 539 (C-H rocking); <sup>1</sup>H NMR (400 MHz, DMSO- d<sub>6</sub>)  $\delta$  9.99 (s, 1H, NH), 7.96 (s, 1H, Ar-H), 7.53 (d,  $J = 8.6$  Hz, 2H, ArH), 7.48 (d,  $J = 8.6$  Hz, 1H, ArH), 7.30 (dd,  $J = 8.6$  Hz,  $J = 2.1$  Hz, 2H, Ar-H), 7.04 (t, 1H,  $J = 8.6$  Hz, Ar-H), 6.86 (s, 2H, NH<sub>2</sub>), 6.75 (d,  $J = 8.6$  Hz, 1H, Ar-H), 3.74 (s, 3H, OCH<sub>3</sub>), 3.42 (s, 2H, SeCH<sub>2</sub>); <sup>13</sup>C NMR (101 MHz, DMSO- d<sub>6</sub>)  $\delta$  168.65, 167.65, 151.81, 141.13, 139.49, 138.20, 129.14, 123.74, 119.62, 117.89, 111, 109.71, 51.93, 32.33. MS (EI, 70 eV)  $m/z$  (%) = 364.20 (M, 100.0, base peak), 230 (40.48), 91.10 (31), 77.05 (24.13), 59 (14.56).

### SI 2. GI% of the investigated organoselenium compounds (7-12) against a series of cancer and normal cell lines

The antitumor activities of the investigated organoselenium compounds (**7-12**) against all tested cell lines were evaluated by sulphorhodamine-B (SRB) assay<sup>5</sup>. Briefly, cells were seeded at a density of  $3 \times 10^3$  cells/well in 96-well microtiter plates. They were left to attach for 24 h before incubation with the aforementioned compounds. Next, cells were treated with 100  $\mu$ g/mL for **7-12** candidates.

For each concentration, three wells were used and incubation was continued for 48 h. DMSO was used as a control vehicle (1 % v/v). At the end of incubation, cells were fixed with 20% trichloroacetic acid, and stained with 0.4% SRB dye. The optical density (O.D.) of each well was measured spectrophotometrically at 570 nm using an ELISA microplate reader (TECAN sunrise™, Germany). The mean survival fraction at each drug concentration was calculated as follows: O.D. of the treated cells/O.D. of the control cells. The IC<sub>50</sub> (concentration that produces

## Supporting Information

50% of cell growth inhibition) value of each drug was calculated using sigmoidal dose-response curve-fitting models (Graph Pad Prizm software, version 8).

### **SI 3. Cytotoxic inhibitory concentration 50 (IC<sub>50</sub>) evaluation against HCT<sub>116</sub>, HEPG2, A375, MDA-MB-468, and A431 cancer cell lines**

The antitumor activities of the investigated organoselenium compounds (**7-12**) against HCT116, HEPG2, A375, MDA-MB-468, and A431 cells, were evaluated by sulphorhodamine-B (SRB) assay<sup>5</sup>. Briefly, cells were seeded at a density of  $3 \times 10^3$  cells/well in 96-well microtiter plates. They were left to attach for 24 h before incubation with the aforementioned compounds. Next, cells were treated with different concentrations of 62.5, 12.5, 25, and 50  $\mu\text{g/mL}$  for **3-17** candidates.

For each concentration, three wells were used and incubation was continued for 48 h. DMSO was used as a control vehicle (1 % *v/v*). At the end of incubation, cells were fixed with 20% trichloroacetic acid, and stained with 0.4% SRB dye. The optical density (O.D.) of each well was measured spectrophotometrically at 570 nm using an ELISA microplate reader (TECAN sunrise™, Germany). The mean survival fraction at each drug concentration was calculated as follows: O.D. of the treated cells/O.D. of the control cells. The IC<sub>50</sub> (concentration that produces 50% of cell growth inhibition) value of each drug was calculated using sigmoidal dose-response curve-fitting models (Graph Pad Prizm software, version 8).

### **SI 4. Protein expression of the apoptosis-related genes**

The microplate provided in this kit has been pre-coated with an antibody specific to P53, BAX, Caspases 3, 6, 8, and 9, BCL-2, MMP2, and MMP9. Standards or samples are then added to the appropriate microplate wells with a biotin-conjugated antibody specific to P53, BAX, Caspases 3, 6, 8, and 9, BCL-2, MMP2, and MMP9. Next, Avidin conjugated to Horseradish Peroxidase (HRP) is added to each microplate well and incubated. After the TMB substrate solution is added, only those wells that contain P53, BAX, Caspases 3, 6, 8, and 9, BCL-2, MMP2, and MMP9, biotin-conjugated antibody, and enzyme-conjugated Avidin will exhibit a color change. The enzyme-substrate reaction is terminated by the addition of sulphuric acid solution and the color change is measured spectrophotometrically at a wavelength of  $450 \text{ nm} \pm 10 \text{ nm}$ . The concentration of P53, BAX, Caspases 3, 6, 8, and 9, BCL-2, MMP2, and MMP9 in the samples is

## Supporting Information

then determined by comparing the O.D. of the samples to the standard curve. Average the duplicate readings for each standard, control, and sample, and subtract the average zero standard optical density. Construct a standard curve by plotting the mean O.D. and concentration for each standard and draw a best-fit curve through the points on the graph or create a standard curve on log-log graph paper with P53, BAX, Caspases 3, 6, 8, and 9, BCL-2, MMP2, and MMP9 concentration on the y-axis and absorbance on the x-axis. Using some plot software, for instance, Curve Expert 1.30, is also recommended. If samples have been diluted, the concentration read from the standard curve must be multiplied by the dilution factor.

### *Procedure*

1. Determine wells for diluted standard, blank, and samples (**8, 9, 10, and 11**). Prepare 7 wells for standard, 1 well for blank. Add 100  $\mu\text{L}$  each of dilutions of standard, blank, and samples into the appropriate wells. Cover with the Plate sealer. Incubate for 1 h at 37  $^{\circ}\text{C}$ .
2. Remove the liquid from each well, don't wash.
3. Add 100  $\mu\text{L}$  of Detection Reagent A working solution to each well, cover the wells with the plate sealer, and incubate for 1 h at 37  $^{\circ}\text{C}$ .
4. Aspirate the solution and wash with 350  $\mu\text{L}$  of 1 $\times$  Wash Solution to each well using a squirt bottle, multi-channel pipette, manifold dispenser, or autowasher, and let it sit for 1~2 min. Remove the remaining liquid from all wells completely by snapping the plate onto absorbent paper. Totally wash 3 times. After the last wash, remove any remaining Wash Buffer by aspirating or decanting. Invert the plate and blot it against absorbent paper.
5. Add 100  $\mu\text{L}$  of Detection Reagent B working solution to each well, cover the wells with the plate sealer, and incubate for 30 min at 37  $^{\circ}\text{C}$ .
6. Repeat the aspiration/wash process for a total of 5 times as conducted in step 4.
7. Add 90  $\mu\text{L}$  of Substrate Solution to each well. Cover with a new Plate sealer. Incubate for 10-20 min at 37  $^{\circ}\text{C}$  (Don't exceed 30 min). Protect from light. The liquid will turn blue with the addition of a Substrate Solution.

## Supporting Information

8. Add 50  $\mu\text{L}$  of Stop Solution to each well. The liquid will turn yellow with the addition of the stop solution. Mix the liquid by tapping the side of the plate. If the color change does not appear uniform, gently tap the plate to ensure thorough mixing.

9. Remove any drop of water and fingerprint on the bottom of the plate and confirm there is no bubble on the surface of the liquid. Then, run the microplate reader and conduct measurement at 450 nm immediately.

## References

1. B. Al-Abdallah, Y. S. Al-Faiyz and S. Shaaban, *Biomolecules*, 2022, **12**, 1765.
2. M. Sak, Y. S. Al-Faiyz, H. Elsayy and S. Shaaban, *Antioxidants*, 2022, **11**, 1231.
3. S. Shaaban, Y. S. Al-Faiyz, G. M. Alsulaim, M. Alaasar, N. Amri, H. Ba-Ghazal, A. A. Al-Karmalawy and A. Abdou, *Inorganics*, 2023, **11**, 321.
4. B. Al-Abdallah, Y. S. Al-Faiyz and S. Shaaban, *Inorganics*, 2022, **10**, 246.
5. P. Skehan, R. Storeng, D. Scudiero, A. Monks, J. McMahon, D. Vistica, J. T. Warren, H. Bokesch, S. Kenney and M. R. Boyd, *JNCI: Journal of the National Cancer Institute*, 1990, **82**, 1107-1112.
